# Supplementary material for: Complete Genome Sequence of Bradyrhizobium sp. S23321: Insights into Symbiosis Evolution in Soil Oligotrophs
Source: PubMed Central journal article supplement (PMC4036050; doi:10.1264/jsme2.me11321), 2012-03-28
Supplement: 27_306_s1.pdf [file 27_306_s1.pdf]

## Supplementary materials

### Complete Genome Sequence of *Bradyrhizobium* sp. S23321: Insights into Symbiosis Evolution in Soil Oligotrophs

Takashi Okubo<sup>1\*</sup>, Takahiro Tsukui<sup>1\*</sup>, Hiroko Maita<sup>1,2\*</sup>, Shinobu Okamoto<sup>3\*</sup>, Kenshiro Oshima<sup>4</sup>, Takatomo Fujisawa<sup>5</sup>, Akihiro Saito<sup>6</sup>, Hiroyuki Futamata<sup>7</sup>, Reiko Hattori<sup>8</sup>, Yumi Shimomura<sup>9</sup>, Shin Haruta<sup>10</sup>, Sho Morimoto<sup>9</sup>, Yong Wang<sup>9</sup>, Yoriko Sakai<sup>9</sup>, Masahira Hattori<sup>4</sup>, Shin-Ichi Aizawa<sup>11</sup>, Kenji V. P. Nagashima<sup>10</sup>, Sachiko Masuda<sup>1</sup>, Tsutomu Hattori<sup>8</sup>, Akifumi Yamashita<sup>1</sup>, Zhihua Bao<sup>1</sup>, Masahito Hayatsu<sup>9</sup>, Hiromi Kajiya-Kanegae<sup>3</sup>, Ikuo Yoshinaga<sup>12</sup>, Kazunori Sakamoto<sup>13</sup>, Koki Toyota<sup>14</sup>, Mitsuteru Nakao<sup>3</sup>, Mitsuyo Kohara<sup>2</sup>, Mizue Anda<sup>1</sup>, Rieko Niwa<sup>9</sup>, Park, Jung-Hwan<sup>12</sup>, Reiko Sameshima-Saito<sup>15</sup>, Shin-ichi Tokuda<sup>16</sup>, Sumiko Yamamoto<sup>5</sup>, Syuji Yamamoto<sup>7</sup>, Tadashi Yokoyama<sup>17</sup>, Tomoko Akutsu<sup>2</sup>, Yasukazu Nakamura<sup>5</sup>, Yuka Nakahira-Yanaka<sup>18</sup>, Yuko Takada Hoshino<sup>9</sup>, Hideki Hirakawa<sup>2</sup>, Hisayuki Mitsui<sup>1</sup>, Kimihiro Terasawa<sup>1</sup>, Manabu Itakura<sup>1</sup>, Shusei Sato<sup>1,2</sup>, Wakako Ikeda-Ohtsubo<sup>1</sup>, Natsuko Sakakura<sup>5</sup>, Eli Kaminuma<sup>5</sup>, and Kiwamu Minamisawa<sup>1\*\*</sup>

<sup>1</sup>Graduate School of Life Sciences, Tohoku University, 2-1-1 Katahira, Aoba-ku, Sendai, Miyagi 980-8577, Japan; <sup>2</sup>Laboratory for Plant Genome Informatics, Kazusa DNA Research Institute, 2-6-7 Kazusakamatari, Kisarazu, Chiba 292-0818, Japan; <sup>3</sup>Database Center for Life Science (DBCLS), Research Organization of Information and Systems (ROIS), 2-11-16 Yayoi, Bunkyo-ku, Tokyo 113-0032, Japan; <sup>4</sup>Graduate School of Frontier Sciences, University of Tokyo, 5-1-5, Kashiwa-no-ha, Kashiwa, Chiba 277-8561, Japan; <sup>5</sup>Center for Information Biology and DNA Data Bank of Japan, National Institute of Genetics, Research Organization for Information and Systems, Yata, Mishima, Shizuoka 411-85, Japan; <sup>6</sup>Department of Material and Life Science, Faculty of Science and Technology, Shizuoka Institute of Science and Technology 2200-2 Toyosawa, Fukuroi, Shizuoka 437-8555, Japan; <sup>7</sup>Department of Material Science and Chemical Engineering, Shizuoka University, 3-5-1 Jyohoku, Naka-ku, Hamamatsu, Shizuoka, 432-8561, Japan; <sup>8</sup>Attic Lab, 1-6-2-401 Komegafukuro, Aobaku, Sendai, Miyagi 980-0813, Japan; <sup>9</sup>National Institute for Agro-Environmental Sciences, 3-1-3 Kannondai, Tsukuba, Ibaraki 305-8604, Japan; <sup>10</sup>Graduate School of Science and Engineering, Tokyo Metropolitan University, 1-1 Minami-Osawa, Hachioji-shi, Tokyo 192-0397, Japan; <sup>11</sup>Department of Life Sciences, Prefectural University of Hiroshima, 562 Nanatsuka, Shobara, Hiroshima 727-0023, Japan; <sup>12</sup>Graduate School of Agriculture, Kyoto University, Oiwake-cho, Kitashirakawa, Sakyo-ku, Kyoto 606-8502, Japan; <sup>13</sup>Graduate School of Horticulture, Chiba University, 648 Matsudo, Matsudo, Chiba 271-8510, Japan; <sup>14</sup>Tokyo University of Agriculture and Technology, 2-24-16, Naka, Koganei, Tokyo 184-8588, Japan; <sup>15</sup>Faculty of Agriculture, Shizuoka University, 836 Ohya, Suruga-ku, Shizuoka 422-8529, Japan; <sup>16</sup>National Institute of Vegetable and Tea Sciences, National Agriculture and Food Research Organization, 3-1-1 Kannondai, Tsukuba, Ibaraki 305-8666, Japan; <sup>17</sup>Institute of Agriculture, Tokyo university of Agriculture and Technology, 3-5-8 Saiwaicho, Fuchu, Tokyo 183-8509, Japan; and <sup>18</sup>Graduate School of Life and Environment Sciences, University of Tsukuba, 1-1-1 Ten-noudai, Tsukuba, Ibaraki 305-8572, Japan

## **Materials and Methods**

### *Community annotation*

The accuracy of genome annotation was increased by effectively combining automated annotation and community-based manual annotation. To avoid the problems of information duplication and inconsistency that can occur in community annotation work, we used a communication system that made use of a Wiki (user-editable website) and mailing-list system, created standard operating procedures (SOPs), and maintained central control of annotation data. KazusaAnnotation (<http://genome.kazusa.or.jp/rhizobase/>), an annotation support tool, was used to avoid duplication of annotation work. The Kazusa DNA Research Institute supplied an annotation database (cgaRhizoBase) so that a list of all submissions by participating users could be viewed. SOPs were developed to maintain consistency in the annotation work. All cooperative annotation work complied with these procedures. To maintain consistency in the style of annotation data, all submissions of annotation information were made through the KazusaAnnotation entry support tool.

### *Standard operating procedures (SOPs)*

SOP documents were developed detailing the work procedures. These were shared with the community using the Wiki system. The SOPs included methods for using these tools and information, methods for proper use and attribution when making use of annotations from various public databases, a basic list of terminology for genome annotation, *etc.* The objective of the SOPs was to bring together background knowledge for the participants. Initially, a gene set created by automated annotation was provided as a starting point for the manual annotation. The manual annotation work was performed in two stages: primary annotation, which was a manual checking of gene descriptions provided by automated annotation, and secondary annotation, which was functional annotation by specialists in each field.

### *Annotation tools*

Cooperative annotation work was carried out using a combination of cgaRhizoBase, a database that collects and stores genome information such as the

orientation of genes and gene descriptions, and KazusaAnnotation, which stores annotations and annotator information and provides data entry support. cgaRhizoBase has an access control function that is based on the RhizoBase / CyanoBase (<http://genome.kazusa.or.jp/rhizobase/>) (31) interface. This database could be accessed only by the participants in this genome annotation project, but information could be shared among the participants. Information such as gene ID, gene symbol, function, coding sequence length, protein length, gene family, family member designation, and external links is stored in the database. In addition, it is possible to find reference information on protein orthologues and homologues and to carry out sequence homology searches. All of the annotation information submitted by the participants was stored in the database through the web interface for KazusaAnnotation and integrated into the cgaRhizoBase gene information page.

## **Results**

### *Annotation jamboree*

An annotation jamboree was held at the Agriculture, Forestry and Fisheries Research Information Technology Conference Hall on July 20–22, 2010. Thirty-one people, including five students, from six universities and 11 research institutes participated. The results were an improvement in 2068 gene names among 6948 genes identified during the automatic annotation.

Secondary annotation in each of the specialty fields was carried out using a similar system; during this stage, approximately 600 genes were re-annotated. As part of the secondary annotation, ATP-binding cassette (ABC) transporter genes and their related proteins were classified by performing a BLASTN analysis against the ABCISSE database (<http://www.pasteur.fr/recherche/unites/pmtg/abc/index.html>), in which ABC proteins are phylogenetically and functionally classified based on amino acid sequences (6). Pathway analysis was also conducted through BLASTP comparisons against the KEGG PATHWAY database using the KAAS system (30).

### *Putative replication origin and terminus*

A GC skew analysis was performed to locate the probable origin and terminus of DNA replication (15). A shift of GC skew was observed in two regions of the genome, at coordinates 200 kb and 3850 kb, as shown in the innermost circle of Fig 2.

The conserved sequence pattern required to convert a dimer chromosome to monomers after aberrant DNA duplication led to the designation of *dif*, a 28-mer sequence (4). The genome sequence of S23321 revealed that *dif* is located at coordinates 3,722,896–3,722,869 bp, near one side of the GC-skew shift. It is likely that DNA replication terminates in this region. Another shift in GC skew was detected on the opposite side of the circular chromosome from *dif*, which seems to indicate the presence of a putative origin of replication coinciding with other typical origins of replication from the *Bradyrhizobiaceae* (22). In the case of USDA110, the putative origin is positioned between genes *blI0636* and *blR0637*. In S23321, the orthologues of these two genes were S23\_1990 and S23\_02010, respectively. This intergenic region showed nucleotide sequence alignment with 81% identity over 346 bp (S23321 coordinates 207,956–208,301 bp) with the corresponding region of the USDA110 sequence. This suggests that the sequence corresponding to the origin of replication is conserved in this region.

#### *Photosynthetic genes bchE and bchJ*

A BLAST search analysis of the genome sequence of S23321 identified no candidates for *bchE* and *bchJ*. This was unexpected because all of the genomic DNAs reported so far for photosynthetic proteobacteria contain these genes. *R. palustris* has *bchE* and *bchJ* in a tandem arrangement, although its location is far from the PGC. The gene product of *bchE* is a Mg-protoporphyrin IX monomethyl ester cyclase that functions under anaerobic conditions (52). However, this function can be compensated for by the presence of *acsF* under semi-aerobic conditions (36), and the S23321 PGC does contain *acsF*. The gene product of *bchJ* is a reductase that converts the 8-vinyl group of chlorophyll to an ethyl group (52). However, it has been reported that bacteriochlorophyll biosynthesis can be completed even when *bchJ* is knocked out, although the yield is reduced (46). These previous reports suggest that conservation of *bchE* and *bchJ* is not essential for bacteriochlorophyll biosynthesis, and that lack of

*bchE* and *bchJ* in S23321 does not eliminate the possibility of photosynthetic ability in this bacterium.

### *Respiratory chain*

The genome analyses demonstrated that S23321 harbors complexes I, II, III, IV, and V of the respiratory chain (Table S5). All these genes showed the highest similarity (78–96% amino acid identity) to those of USDA110 in BLASTP analysis against the NCBI nr database. Bacterial complex I usually contains either a *nuo* or *nqr* operon containing 14 genes (53). In S23321, the genes encoding complex I (NADH dehydrogenase) consist of a *nuo* operon (S23\_32620–32770) containing 14 genes. The operons of S23321 encoding complex II (succinate dehydrogenase), complex III (cytochrome *bc*<sub>1</sub> complex), and complex V (F<sub>0</sub>F<sub>1</sub> ATPase), were similar to those in the USDA110 genome.

However, there are a number of differences between S23321 and USDA110 in the structure of complex IV (terminal oxidase). Six terminal oxidase complexes were found in the S23321 genome: three of these six were cytochrome *c* oxidases, whereas the other three were quinol oxidases (Table S5). The members of these six oxidase complexes shared a high degree of amino acid sequence identity with *B. japonicum* USDA110. On the other hand, no operons closely related to the *cydAB*-like genes of USDA110 (blr3728–3729) (14) were found in S23321 (5). USDA110 harbors eight terminal oxidase complexes (14), giving it one of the most highly branched respiratory chains of all aerobic prokaryotes and making it capable of functioning throughout a wide range of oxygen tensions. Of the six terminal oxidase complexes in S23321, the S23\_52330–52360 operon most likely corresponds to the *fixNOQP* gene cluster in USDA110, which encodes an oxidase with an extremely high affinity for O<sub>2</sub> that is expressed microaerobically, *i.e.*, under extremely low oxygen levels (24, 33, 34, 37). The S23\_52770–52800 operon is most closely related to the *coxWXYZ* gene cluster, which encodes a microaerobically expressed *bb*<sub>3</sub>-type ubiquinol oxidase (45). The S23\_06500–06530 and S23\_07900–07930 operons are closely related to *cyoABCD* and *coxABCD*, respectively, which are expressed under aerobic conditions.

Low oxygen concentrations induce *fixNOQP* expression in USDA110 (14). It

has been reported that the *fixNOQP* operon and denitrification genes are regulated by the FixLJ two-component regulatory system and FixK<sub>2</sub> (2, 28, 32). S23\_52400, 52410, and 52430 in S23321 are closely related to *fixL*, *fixJ*, and *fixK<sub>2</sub>* in USDA110, respectively (identity of 85.0%, 85.9%, and 89.7%, respectively). These facts suggest that S23321 is capable of functioning throughout a wide range of oxygen tensions. A detailed analysis of metabolic processes would be needed to explain why S23321 is a slow-growing bacterium in the DNB test system, since it appears from the genome analysis that S23321 has multiple energy-producing mechanisms.

It is also interesting that S23321 harbors a *fixNOQP* operon, which plays a role in symbiotic nitrogen fixation (25), because this strain is not capable of inducing nodules on siratro roots roots. Genes orthologous to *fixNOQP* of USDA110 have been identified in other Gram-negative bacteria; these have been designated *ccoNOQP* genes. CcoNOQP has been extensively studied in *Rhodobacter sphaeroides*, where it functions not only as a terminal oxidase (12), but also as a redox sensor in a signal transduction pathway controlling the expression of genes involved in photosynthesis (19, 35).

### *Chemotaxis*

There are three clusters of chemotaxis genes in S23321: the first located at 450 kb, the second at 5876 kb, and the third at 6030 kb. The second cluster comprises a complete set of general chemotaxis genes: *cheB* (methylase), *cheR* (methyltransferase), two copies of *mcp* (methyl-accepting chemotaxis protein, or sensory receptor), two copies of *cheW* (a connector between Mcp and CheA), *cheA* (histidine kinase), and *cheY* (sensory response regulator). However, *cheZ* (phosphatase) is missing in this organism (43), and the first and third *che* clusters of S23321 are incomplete.

In addition to the two *mcp* genes in the second cluster, there are at least 31 other *mcp* genes scattered throughout the genome. There are two *cheA* homologues between positions 4000 and 5000 kb and one *aer* (receptor for aerotaxis) gene at 5085 kb. It is not clear at the moment whether these genes are expressed.

### *Protein secretion systems*

Among the types of protein secretion systems known in other species, genes corresponding to a type II secretion system (T2SS) and a type III secretion system

(T3SS) were found in S23321, but no genes were found for a type I secretion system (T1SS) or a type IV secretion system (T4SS).

There are two types of secretion systems that use the signal peptidase: the general secretion pathway (GSP) and the type IV pilus assembly system. Within the GSP, the *secA*, *secB*, *secD*, *secE*, *secF*, *secG*, and *secY* genes were found scattered throughout the genome (Fig. S5). On the other hand, the genes required for type IV pilus assembly, *ctpA* to *ctpI*, are clustered at 1,062 kb. Several *pilA* genes, which encode the major component of the pilus, are found at several sites in the genome (Fig. S5). The three *pilA* genes are likely intact, because of the presence of typical SD (Shine-Dalgarno) sequences (Fig. S10). However, biochemical tests are necessary to determine whether these genes are used for construction of the pilus. It should be noted that two other *Bradyrhizobium* strains, ORS278 and BTAi1, possess only one *pilA* gene.

There is only one type of T3SS in S23321, the flagellar assembly system. Other T3SS, *e.g.*, for pathogenicity or nodule formation, are missing from this species, though the complete set of T3SS genes is found in *B. japonicum*.

Genes for the twin-arginine translocation (TAT) system are clustered within the *secDFG* gene cluster at 3,507 kb: these genes include *tatA*, *tatB*, and *tatC* (Fig. S5).

#### *ABC transporters and macromolecule biodegradation*

ABC systems constitute one of the most abundant superfamilies of proteins. They are involved not only in the import and export of a wide variety of substances but also in many other cellular processes. The S23321 genome contains 492 ORFs for ABC proteins and their interacting partners. Of these 492 ORFs, 455 and 27 ORFs are predicted to be involved in uptake and efflux, respectively. As in other prokaryotes, most of the putative importer genes form clusters, each of which encodes the components for a particular import system (Table S6).

The composition of the ABC systems in S23321 is similar to that in *B. japonicum* USDA110, which possesses orthologues of 382 of the 492 ORFs for ABC systems found in the S23321 genome (Table S6). The ABC systems of these two *Bradyrhizobium* species, in contrast to those of the typical saprophytic soil bacterium *Streptomyces coelicolor* A3(1) (3), have few uptake systems for oligosaccharides and polyols (Table S7), which would be produced via degradation of polysaccharides by

secreted glycosyl hydrolases. As in other members of the *Rhizobiaceae*, S23321 seems to have relatively few genes for glycosyl hydrolases (GH) compared with *S. coelicolor* A3(1). S23321 has only one putative alpha-amylase gene (S23\_15430), which is surrounded by genes for a putative glycosyl hydrolase (S23\_15420) belonging to GH family 13, and for putative glycogen-debranching and -branching enzymes (S23\_15440 and 15450, respectively).

The ABC system of S23321, like that of USDA110, is relatively rich in genes encoding HAA (hydrophobic amino acids and amides) and OPN (oligopeptides and nickel) family transporters (which might be involved in uptake of amino acids and oligopeptides, respectively), when compared to those of *Pseudomonas putida* KT24440 and *S. coelicolor* A3(1) (Table S7). S23321 contains putative genes for 35 proteases, 15 of which are predicted to be secreted. S23321 might thus prefer proteins, oligopeptides, and amino acids to saccharides as a source of energy. Alternatively, S23321 might preferentially inhabit the rhizoplane (root surface) and/or rhizosphere, where amino acids, monosaccharides, and other low-molecular-weight substances would be supplied from plant roots, and may directly utilize those compounds by uptake via ABC transporters.

### *Carbon and nitrogen metabolism*

S23321 possesses all of the genes required for glycolysis and gluconeogenesis, the citrate cycle (TCA cycle, Krebs cycle), the pentose phosphate pathway, the glyoxylate cycle, fatty acid biosynthesis, and fatty acid metabolism (Table S8), suggesting that this bacterium is able to use many carbon substrates through multiple catabolic pathways to adapt to a free-living life in the soil environment.

For monosaccharide transport, there is one predicted ABC transporter in the S23321 genome: a ribose transporter encoded by S23\_46840 to S23\_46870. However, since a multiple-sugar ABC transporter encoded by the *chvE* operon in *Brucella suis* had the ability to transport many types of monosaccharides (1), it is possible that S23321 also takes in monosaccharides through the same strategy.

Compared with *B. japonicum* USDA110, S23321 lacks genes for several enzymes involved in nitrogen metabolism, such as L-asparaginase, asparagine synthase, glutamate dehydrogenase, and nitrilase (Table S9). Thus, S23321 has fewer genes



involved in nitrogen metabolism than its close relatives USDA110, BTai1, and ORS278. The absence of these genes in S23321 includes the lack of a *nosZ* gene for the final step of denitrification, and it is thus unable to consume nitrile or synthesize L-asparagine. It is likely that L-Asn-tRNA<sup>Asn</sup> is produced from L-Asp-tRNA<sup>Asn</sup> by aspartyl-tRNA amidotransferase encoded by *gatA*, *gatB*, and *gatC*, but not directly synthesized from L-asparagine (Table S10), as has been shown for *Deinococcus radiodurans* (29). It is likely that *B. japonicum* USDA110 and *Bradyrhizobium* sp. BTai1 and ORS278 have also evolved the same mechanism to produce L-Asn-tRNA<sup>Asn</sup> (Table S10). S23321 probably senses the level of environmental nitrogen via two NtrC-family two-component systems (S23\_36930–36940 and S23\_36910–36920), and takes in ammonia through two transporters encoded by S23\_02240 and S23\_02290. In addition, three genes were predicted to encode PII proteins (S23\_02250, S23\_02300 and S23\_32340), which regulate nitrogen assimilation (8, 11).

#### *Degradation of aromatics*

In soil, microorganisms usually compete for nutrients, including aromatic compounds, to help them survive. There are many reports of utilization of aromatics by *Bradyrhizobium* spp. for growth (21, 42, 49). *B. japonicum* USDA110 is able to degrade and utilize 4-hydroxybenzoate and vanillate, both of which are intermediates in the degradation of humic substances and lignin (16, 44). In the S23321 genome, there are several sets of gene homologues for degrading 4-hydroxybenzoate and vanillate (Table S11). Thus, S23321 is likely able to degrade vanillate and 4-hydroxybenzoate (Fig. S6).

When vanillate is oxidized to protocatechuate, formaldehyde is produced as a byproduct (Fig. S6). USDA110 metabolizes formaldehyde via a glutathione-dependent pathway (16). The S23321 genome contains genes whose predicted amino acid sequences are at least 84–96% identical to those of the genes for metabolizing formaldehyde in USDA110 (Table S11). This result indicates that S23321 has the same metabolic pathway for formaldehyde as USDA110.

The chromosomal organization of genes for degrading vanillate, 4-hydroxybenzoate, and formaldehyde is well conserved between S23321 and USDA110 (Fig. S7), supporting the hypothesis that S23321 has the same metabolic pathways for these substrates as USDA110.

From genome data analysis performed with the KEGG PATHWAY database (30), gene homologues for the degradation of toluene and 4-chlorocatechol were found in S23321 (Fig. S8). In fact, some toluene-degrading *Bradyrhizobium* spp. have been isolated from groundwater polluted with toluene (7), and utilization of 4-chlorocatechol by *B. japonicum* has been reported (42).

### *Chemoautotrophy*

Genes for chemoautotrophy were surveyed in the S23321 genome because *B. japonicum* USDA110 is able to grow chemoautotrophically. Thiosulfate-oxidizing *sox* genes were found at four loci (I, II, III, and IV) in the USDA110 genome. The cells of USDA110 were able to grow chemoautotrophically using thiosulfate as an electron donor. Thiosulfate oxidation in USDA110 likely depends on *sox* locus I. When we searched the genome of S23321, we found homologues to *sox* loci II and III, but not to locus I or IV (Fig. S9A). The gene organization at *sox* loci II and III in S23321 was very similar to that of photosynthetic stem-nodulating *Bradyrhizobium* sp. BTAi1 and ORS278 and to *B. japonicum* USDA110 (Fig. S9A).

In USDA110, a *soxY*<sub>2</sub> deletion mutation gene at *sox* locus II, which is homologous to the Sox system in green sulfur bacteria, showed phenotypes similar to wild-type USDA110 (26). In the amino acid sequences of SoxY in USDA110, the GGCGG motif, essential for the binding of thiosulfate to SoxY, was not conserved in the C terminus of the predicted protein product of *soxY*<sub>3</sub> (part of locus III). Although the product of *soxY*<sub>3</sub> of S23321 is predicted to contain the GGCGG motif at the C terminus (Fig. S9A), the complete *soxWXYZABCD* gene cluster, essential for thiosulfate oxidation in the Sox system, was not found at *sox* locus III. In addition, no genes for uptake hydrogenase genes were found in the S23321 genome. These results suggest that S23321 is unable to grow chemoautotrophically using either thiosulfate or H<sub>2</sub> as an electron donor.

Carbon monoxide dehydrogenase (*cox*) gene homologues were found clustered in the S23321 genome (Fig. S9C). USDA110, which also contains *cox* genes, has carbon monoxide dehydrogenase activity (23). Although it has not yet been determined whether CO oxidation in USDA110 depends on *cox* genes, we predict that S23321 could grow chemoautotrophically using CO as an electron donor. In USDA110, a

mutant of *cbbL*, which encodes the large subunit of ribulose 1,5-bisphosphate carboxylase/oxygenase (RuBisCO), was unable to grow chemoautotrophically (27). A *cbb* cluster was found in the S23321 genome, with gene organization identical to that of USDA110 (Fig. S9B). Therefore, it is likely that S23321 has the capability to fix CO<sub>2</sub> via RuBisCO using CO as an electron donor.

### *Non-coding RNAs*

Non-coding RNAs that have homology with those of *B. japonicum* USDA110 were found in the S23321 genome (Table S12). These include predicted genes for a ribozyme, a class A RNase P, and putative RNA sensors such as glycine riboswitches (three copies), cobalamin riboswitches (four copies), *S*-adenosylmethionine (SAM) riboswitches (two copies), a thiamine pyrophosphate (TPP) riboswitch (one copy), a flavin mononucleotide (FMN) riboswitch (FMN element) (one copy), and a repression of heat shock gene expression (ROSE) element (one copy). The S23321 genome also contains a gene for 6S RNA, which binds to bacterial RNA polymerase holoenzyme and modulates promoter use (51), and one for the RNA component of a bacterial signal recognition particle (SRP), which plays an important role in membrane targeting. The S23321 SRP RNA is 97 bp in length and has the same sequence as that of USDA110, which has a predicted secondary structure similar to that of *E. coli* (38). Several predicted regulatory regions such as *subB* RNA elements (three copies), a *speF* element (one copy), and a *serC* element (one copy), which have been identified in the intergenic regions of many *Alphaproteobacteria*, were also found in the S23321 genome (9). These results indicate that S23321 may use the same functions of non-coding RNAs as *B. japonicum* to modulate gene expression and tRNA processing.

### References

1. Alvarez-Martinez, M. T., J. Machold, C. Weise, H. Schmidt-Eisenlohr, C. Baron, and B. Rouot. 2001. The *Brucella suis* homologue of the *Agrobacterium tumefaciens* chromosomal virulence operon *chvE* is essential for sugar utilization but not for survival in macrophages. *J. Bacteriol.* 183:5343-5351.
2. Bedmar, E. J., E. F. Robles, and M. J. Delgado. 2005. The complete

- denitrification pathway of the symbiotic, nitrogen-fixing bacterium *Bradyrhizobium japonicum*. *Biochem. Soc. Trans.* 33:141-144.
3. Bentley, S. D., K. F. Chater, A. M. Cerdeno-Tarraga, et al. 2002. Complete genome sequence of the model actinomycete *Streptomyces coelicolor* A3(2). *Nature* 417:141-7.
  4. Blakely, G. W., Davidson, A. O., and Sherratt, D. J. 2000. Sequential strand exchange by XerC and XerD during site-specific recombination at *dif*, *J. Biol.Chem.* 275:9930-9936
  5. Bott, M., M. Bolliger, and H. Hennecke. 1990. Genetic analysis of the cytochrome *c-aa<sub>3</sub>* branch of the *Bradyrhizobium japonicum* respiratory chain. *Mol. Microbiol.* 4:2147-2157.
  6. Bouige, P., D. Laurent, L. Piloyan, and E. Dassa. 2002. Phylogenetic and functional classification of ATP-binding cassette (ABC) systems. *Curr. Protein. Pept. Sci.* 3:541-59.
  7. Cavalca, L., E. Dell'Amico, and V. Andreoni. 2004. Intrinsic bioremediability of an aromatic hydrocarbon-polluted groundwater: diversity of bacterial population and toluene monooxygenase genes. *Appl. Microbiol. Biotechnol.* 64:576-87.
  8. Commichau, F. M., K. Forchhammer, and J. Stulke. 2006. Regulatory links between carbon and nitrogen metabolism. *Curr. Opin. Microbiol.* 9:167-72.
  9. Corbino, K. A., J. E. Barrick, J. Lim, R. Welz, B. J. Tucker, I. Puskarz, M. Mandal, N. D. Rudnick, and R. R. Breaker. 2005. Evidence for a second class of S-adenosylmethionine riboswitches and other regulatory RNA motifs in alpha-proteobacteria. *Genome Biol.* 6(8):R70.
  10. Elsik, C. G., K. C. Worley, L. Zhang, N. V. Milshina, H. Jiang, J. T. Reese, K. L. Childs, A. Venkatraman, C. M. Dickens, G. M. Weinstock, and R. A. Gibbs. 2006. Community annotation: procedures, protocols, and supporting tools. *Genome Res.* 16:1329-33.
  11. Forchhammer, K. 2004. Global carbon/nitrogen control by PII signal transduction in cyanobacteria: from signals to targets. *FEMS Microbiol. Rev.* 28:319-33.
  12. Garcia-Horsman, J. A., E. Berry, J. P. Shapleigh, J. O. Alben, and R. B. Gennis. 1994. A novel cytochrome c oxidase from *Rhodobacter sphaeroides* that lacks CuA. *Biochemistry* 33:3113-9.
  13. Giraud, E., L. Moulin, D. Vallenet et al. 2007. Legumes symbioses: absence of Nod genes in photosynthetic bradyrhizobia. *Science* 316:1307-12.
  14. Gottfert, M., H. Hennecke, and S. Tabata. 2005. Facets of the *Bradyrhizobium japonicum* 110 genome. (ed.) R. Palacios, and W.E. Newton. In *Genomes and Genomics of Nitrogen-fixing Organisms.* 99-111.
  15. Grant, J. R., and P. Stothard. 2008. The CGView Server: a comparative genomics tool for circular genomes. *Nucleic Acids Res.* 36:W181-4.
  16. Ito, N., M. Itakura, S. Eda et al. 2006. Global gene expression in *Bradyrhizobium japonicum* cultured with vanillin, vanillate, 4-hydroxybenzoate and protocatechuate. *Microbes Environ.* 21:240-250.

17. Kamagata Y, Fulthorpe RR, Tamura K, Takami H, Forney LJ, TieJe JM. (1997). Pristine environments harbor a new group of oligotrophic 2,4-dichlorophenoxyacetic acid-degrading bacteria. *Appl Environ Microbiol* 63: 2266–2272.
18. Kaneko, T., Y. Nakamura, S. Sato et al. 2000. Complete genome structure of the nitrogen-fixing symbiotic bacterium *Mesorhizobium loti*. *DNA Res.* 7:331-338.
19. Kim, Y. J., I. J. Ko, J. M. Lee, H. Y. Kang, Y. M. Kim, S. Kaplan, and J. I. Oh. 2007. Dominant role of the *cbb3* oxidase in regulation of photosynthesis gene expression through the PrrBA system in *Rhodobacter sphaeroides* 2.4.1. *J. Bacteriol.* 189:5617-25.
20. Larimer, F. W., P. Chain, L. Hauser et al. 2004. Complete genome sequence of the metabolically versatile photosynthetic bacterium *Rhodospseudomonas palustris*. *Nat. Biotechnol* 22:55-61.
21. Latha, S., and A. Mahadevan. 1997. Role of rhizobia in the degradation of aromatic substances. *World J. Microbiol. Biotechnol.* 13:601-607.
22. Lee, K.B. de Backer, P. Aono, T. Liu, C.T. Suzuki, S. Suzuki, T. Kaneko, T. Yamada, M. Tabata, S. Kupfer, D.M. et al. 2008. The genome of the versatile nitrogen fixer *Azorhizobium caulinodans* ORS571. *BMC Genomics* 9:271.
23. Lorite, M. J., J. Tachil, J. Sanjuan, O. Meyer, and E. J. Bedmar. 2000. Carbon monoxide dehydrogenase activity in *Bradyrhizobium japonicum*. *Appl. Environ. Microbiol.* 66:1871-6.
24. Maier, R. J., and D. M. Merberg. 1982. *Rhizobium japonicum* mutants that are hypersensitive to repression of H<sub>2</sub> uptake by oxygen. *J. Bacteriol.* 150:161-7.
25. Mandon, K., P. A. Kaminski, and C. Elmerich. 1994. Functional analysis of the *fixNOQP* region of *Azorhizobium caulinodans*. *J. Bacteriol.* 176:2560-2568.
26. Masuda, S., S. Eda, S. Ikeda, H. Mitsui, and K. Minamisawa. 2010. Thiosulfate-dependent chemolithoautotrophic growth of *Bradyrhizobium japonicum*. *Appl. Environ. Microbiol.* 76:2402-9.
27. Masuda, S., S. Eda, C. Sugawara, H. Mitsui, and K. Minamisawa. 2010. The *cbbL* gene is required for thiosulfate-dependent autotrophic growth of *Bradyrhizobium japonicum*. *Microbes. Environ.* 25:220-3.
28. Mesa, S., F. Hauser, M. Friberg, E. Malaguti, H. M. Fischer, and H. Hennecke. 2008. Comprehensive assessment of the regulons controlled by the FixLJ-FixK2-FixK1 cascade in *Bradyrhizobium japonicum*. *J. Bacteriol.* 190:6568-79.
29. Min, B., J. T. Pelaschier, D. E. Graham, D. Tumbula-Hansen, and D. Soll. 2002. Transfer RNA-dependent amino acid biosynthesis: an essential route to asparagine formation. *Proc. Natl. Acad. Sci. U S A* 99:2678-83.
30. Moriya, Y., M. Itoh, S. Okuda, A. C. Yoshizawa, and M. Kanehisa. 2007. KAAS: an automatic genome annotation and pathway reconstruction server. *Nucleic Acids Res.* 35:W182-5.
31. Nakao, M., S. Okamoto, M. Kohara, T. Fujishiro, T. Fujisawa, S. Sato, S. Tabata, T. Kaneko, and Y. Nakamura. CyanoBase: the cyanobacteria genome database

- update 2010. *Nucleic Acids Res.* 38:D379-81.
32. Nellen-Anthamatten, D., P. Rossi, O. Preisig, I. Kullik, M. Babst, H. M. Fischer, and H. Hennecke. 1998. *Bradyrhizobium japonicum* FixK2, a crucial distributor in the FixLJ-dependent regulatory cascade for control of genes inducible by low oxygen levels. *J. Bacteriol.* 180:5251-5.
  33. O'Brian, M. R., and R. J. Maier. 1982. Electron transport components involved in hydrogen oxidation in free-living *Rhizobium japonicum*. *J. Bacteriol.* 152:422-30.
  34. O'Brian, M. R., and R. J. Maier. 1983. Involvement of cytochromes and a flavoprotein in hydrogen oxidation in *Rhizobium japonicum* bacteroids. *J. Bacteriol.* 155:481-7.
  35. Oh, J. I., and S. Kaplan. 2002. Oxygen adaptation. The role of the CcoQ subunit of the *cbb<sub>3</sub>* cytochrome *c* oxidase of *Rhodobacter sphaeroides* 2.4.1. *J. Biol. Chem.* 277:16220-8.
  36. Pinta, V., M. Picaud, F. Reiss-Husson, and C. Astier. 2002. *Rubrivivax gelatinosus* *acsF* (previously orf358) codes for a conserved, putative binuclear-iron-cluster-containing protein involved in aerobic oxidative cyclization of Mg-protoporphyrin IX monomethylester. *J. Bacteriol.* 184:746-53.
  37. Preisig, O., D. Anthamatten, and H. Hennecke. 1993. Genes for a microaerobically induced oxidase complex in *Bradyrhizobium japonicum* are essential for a nitrogen-fixing endosymbiosis. *Proc. Natl. Acad. Sci. U S A* 90:3309-13.
  38. Regalia, M., M. A. Rosenblad, and T. Samuelsson. 2002. Prediction of signal recognition particle RNA genes. *Nucleic Acids Res.* 30:3368-77.
  39. Saito, A., H. Mitsui, R. Hattori, K. Minamisawa, and T. Hattori. 1998. Slow-growing and oligotrophic soil bacteria phylogenetically close to *Bradyrhizobium japonicum*. *FEMS Microbiol. Ecol.* 25:277-286.
  40. Sameshima R, Isawa T, Sadowsky MJ, Hamada T, Kasai H, Shutsrirung A et al. 2003. Phylogeny and distribution of extra-slow-growing *Bradyrhizobium japonicum* harboring high copy numbers of RSa, RSb and IS1631. *FEMS Microbiol Ecol* 44: 191–202.
  41. Sameshima-Saito R, Chiba K, Minamisawa K. 2006. Correlation of denitrifying capability with the existence of *nap*, *nir*, *nor* and *nos* genes in diverse strains of soybean bradyrhizobia. *Microbes Environ* 21:174–184.
  42. Sonia, V., M. Häggblom, and L. Young. 2002. Biodegradation of aromatic and aliphatic compounds by rhizobial species. *Soil Science* 167:802-810.
  43. Sourjik, V., and J. P. Armitage. Spatial organization in bacterial chemotaxis. *EMBO J.* 29:2724-33.
  44. Sudtachat, N., N. Ito, M. Itakura, S. Masuda, S. Eda, H. Mitsui, Y. Kawaharada, and K. Minamisawa. 2009. Aerobic vanillate degradation and C1 compound metabolism in *Bradyrhizobium japonicum*. *Appl. Environ. Microbiol.* 75:5012-7.
  45. Surpin, M. A., M. Lubben, and R. J. Maier. 1996. The *Bradyrhizobium japonicum* *coxWXYZ* gene cluster encodes a *bb<sub>3</sub>*-type ubiquinol oxidase. *Gene*

- 183:201-6.
46. Suzuki, J. Y., and C. E. Bauer. 1995. Altered monovinyl and divinyl protochlorophyllide pools in *bchJ* mutants of *Rhodobacter capsulatus*. Possible monovinyl substrate discrimination of light-independent protochlorophyllide reductase. *J. Biol. Chem.* 270:3732-40.
  47. Tamura, K., D. Peterson, N. Peterson, G. Stecher, M. Nei, and S. Kumar. MEGA5: Molecular evolutionary genetics analysis using maximum likelihood, evolutionary distance, and maximum parsimony methods. *Mol. Biol. Evol.*
  48. Thompson, J. D., D. G. Higgins, and T. J. Gibson. 1994. CLUSTAL W: improving the sensitivity of progressive multiple sequence alignment through sequence weighting, position-specific gap penalties and weight matrix choice. *Nucleic Acids Res.* 22:4673-80.
  49. Van Rossum, D., F. P. Schuurmans, M. Gillis, A. Muyotcha, H. W. Van Verseveld, A. H. Stouthamer, and F. C. Boogerd. 1995. Genetic and phenetic analyses of *Bradyrhizobium* strains nodulating peanut (*Arachis hypogaea* L.) roots. *Appl. Environ. Microbiol.* 61:1599-609.
  50. Van Berkum P, Fuhrmann JJ. 2000. Evolutionary relationships among the soybean bradyrhizobia reconstructed from 16S rRNA gene and internally transcribed spacer region sequence divergence. *Int J Syst Evol Microbiol* 50: 2165–2172.
  51. Wassarman, K. M., and G. Storz. 2000. 6S RNA regulates *E. coli* RNA polymerase activity. *Cell* 101:613-23.
  52. Willows, R. D., and A. M. Kriegel. 2009. Biosynthesis of bacteriochlorophylls in purple bacteria, p. 57-79. In C. N. Hunter, F. Daldal, M. C. Thurnauer and J. T. Beatty (ed.), *The purple phototrophic bacteria*. Springer, Dordrecht, The Netherlands.
  53. Yagi, T., T. Yano, S. Di Bernardo, and A. Matsuno-Yagi. 1998. Procaryotic complex I (NDH-1), an overview. *Biochim. Biophys. Acta.* 1364:125-33.

Legends of supplementary figures and tables:

Fig. S1. Inoculation of *Bradyrhizobium* sp. S23321 and *B. japonicum* USDA110 onto *Macroptilium atropurpureum* ‘Siratro’. Plants inoculated with *Bradyrhizobium* sp. S23321 or *B. japonicum* USDA110 were grown at 25 °C using nitrogen-free nutrient-solution (see text). Plant phenotypes were photographed. Nodule numbers and nodule weight were determined in triplicate (values are means  $\pm$  standard deviation (SD)). *Bradyrhizobium* sp. S23321 formed no nodules on a host legume (*M. atropurpureum* ‘Siratro’) for a broad range of symbiotic bradyrhizobia.

Fig. S2. Comparison of the genome sequences of strains S23321 and USDA110. The genome of *Bradyrhizobium* sp. S23321 was compared with that of *B. japonicum* USDA110 by the MUMmer (a) and GenomeMatcher programs (b–d). (a) Syntenic dot plot of *Bradyrhizobium* sp. strain S23321 (*x*-axis) and strain USDA110 (*y*-axis). The symbiosis islands in USDA110 are shown. Regions marked (b)–(d) are shown in detail below. (b) Alignment of the genome sequences of strains S23321 (6.47–6.64 Mb) and USDA110 (1.52–1.69 Mb). (c) Alignment of the genome sequences of strains S23321 (6.00–6.08 Mb) and USDA110 (2.32–2.40 Mb). (d) Alignment of the genome sequences of strains S23321 (4.70–6.50 Mb) and USDA110 (2.25–8.50 Mb).

Fig. S3. Comparison of the S23321, USDA110, and USDA6 genome regions corresponding to the symbiosis island “Locus C” in the *B. japonicum* genome. The Locus C region of *B. japonicum* was highly conserved between USDA110 (8,974,971–0–70,365 bp) and USDA6 (9,113,996–0–70,356 bp). However, *Bradyrhizobium* sp. S23321 lacks the Locus C region even though the boundary regions of Locus C are conserved at coordinate 775 kb. These results suggest that the ancestor of USDA110 and USDA6 acquired the Locus C region during its evolution.

Fig. S4. Phylogenetic tree based on amino acid sequences of the bacteriochlorophyll biosynthesis enzyme BchH. The programs ClustalX (48) and MEGA (47) were used for the analysis. The tree was constructed by the neighbor-joining method, applying the p-distance parameter as a distance estimator. Gaps were omitted from the calculations. Bootstrap values are shown in the figure.

Fig. S5. Physical maps of genes for flagella (A), chemotaxis (B), and secretion (C) in the S23321 genome. The *pilA* gene (C) encodes a protein for type IV pilus. Asterisks denote ORFs encoding proteins with unknown function.

Fig. S6. Pathways and gene homologues from S23322 involved in the degradation of vanillate and 4-hydroxybenzoate.

Fig. S7. Organization of genes involved in degrading vanillate, 4-hydroxybenzoate, and formaldehyde in the genomes of *Bradyrhizobium* sp. S23321 and *B. japonicum* USDA110. Gray and black arrows show degradation genes and regulatory genes, respectively.



Fig. S8. Pathways and gene homologues from S23321 involved in the degradation of toluene and 4-chlorocatechol.

Fig. S9. Physical maps of the genes related to chemoautotrophic growth in the genome of *Bradyrhizobium* sp. S23321 and other members of the *Bradyrhizobiaceae* (*B. japonicum* USDA110, *Bradyrhizobium* sp. BTAi1, *Bradyrhizobium* sp. ORS278, and *Rhodopseudomonas palustris* CGA009). (A) *sox* genes, (B) *cbb* genes, (C) *cox* genes.

Fig. S10. Putative SD (Shine-Dalgarno) sequences (underlined) of the three *pilA* genes in the S23321 genome. Start codons of the *pilA* genes are shown in red.

Table S1. Bacterial strains used for phylogenetic analysis.

Table S2. Comparison of flagella genes in several bradyrhizobial genomes

Table S3. List of genes in S23321 found on the symbiosis islands of the USDA110 genome

Table S4. Comparison of genes related to stress response in S23321 and its relatives.

Table S5. Genes for respiratory chains in the S23321 genome.

Table S6. Genes for ABC (ATP-binding cassette) proteins and their interacting partners in the *Bradyrhizobium* sp. S23321 genome.

Table S7. Compositions of ABC systems in the genomes of *Bradyrhizobium* sp. S23321 and related species.

Table S8. Genes for major carbon metabolism pathways in the genome of *Bradyrhizobium* sp. S23321.

Table S9. Comparison of the genes for nitrogen metabolism between *Bradyrhizobium* sp. S23321 and its close relatives.

Table S10. Comparison of the genes for L-Asn-tRNA biosynthesis between S23321 and its close relatives.

Table S11. Comparison of genes for degradation of vanillin and related compounds between *Bradyrhizobium* sp. S23321 and *B. japonicum* USDA110.

Table S12. Non-coding RNA in *Bradyrhizobium* sp. S23321

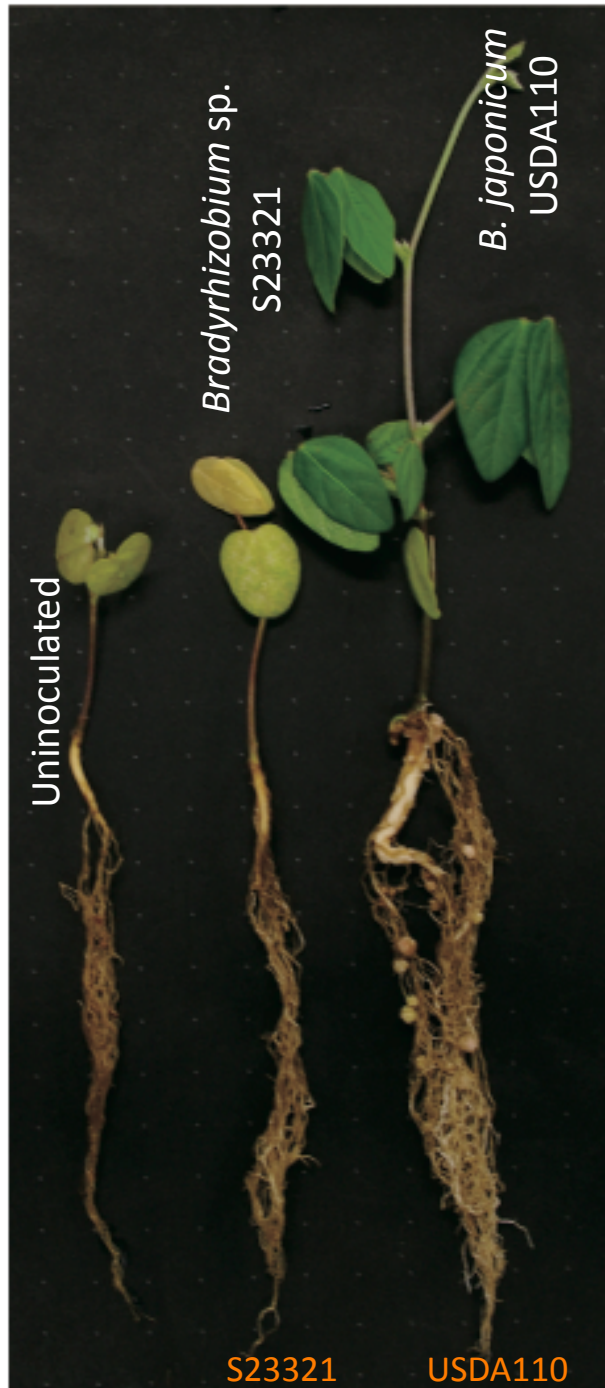

### Nodulated root system

| Uninoculated | <i>Bradyrhizobium</i> sp.<br>S23321 | <i>B. japonicum</i><br>USDA110 |
|--------------|-------------------------------------|--------------------------------|
|--------------|-------------------------------------|--------------------------------|

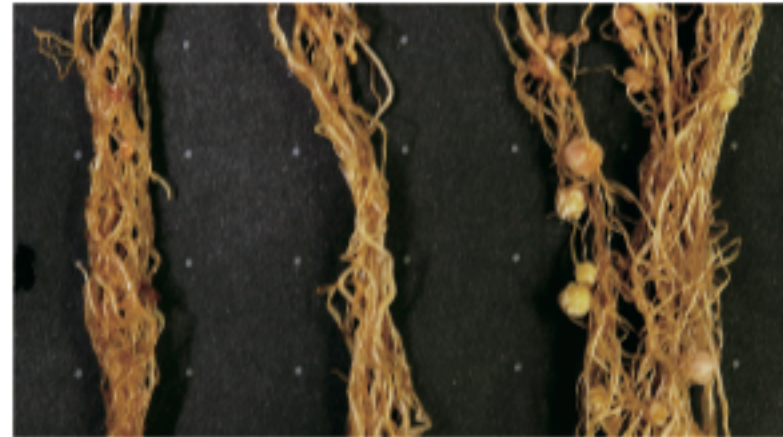

|                                               |   |           |
|-----------------------------------------------|---|-----------|
| Number of nodules<br>(plant <sup>-1</sup> )   | 0 | 44 ± 10   |
| Nodule fresh weight<br>(plant <sup>-1</sup> ) | 0 | 219 ± 151 |

Fig. S1. Inoculation of *Bradyrhizobium* sp. S23321 and *B. japonicum* USDA110 to *Macroptilium atropurpureum* cv. Siratro. Plants inoculated with *Bradyrhizobium* sp. S23321 or *B. japonicum* USDA110 were grown at 25°C using nitrogen-free nutrient-solution (see text). Plant phenotypes were photographed. Nodule numbers and nodule weight were determined with triplicates (means ± SD). *Bradyrhizobium* sp. S23321 formed no nodule to a broad-range legume (*Macroptilium atropurpureum* cv. Siratro) for symbiotic bradyrhizobia.

(a)

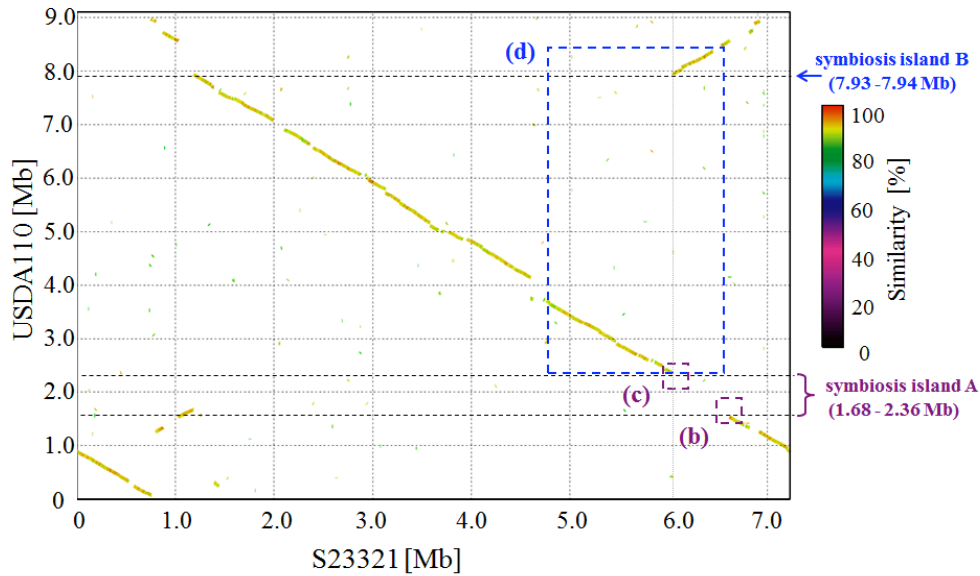

(b)

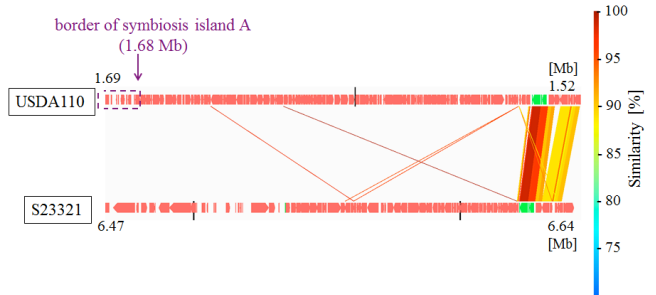

(c)

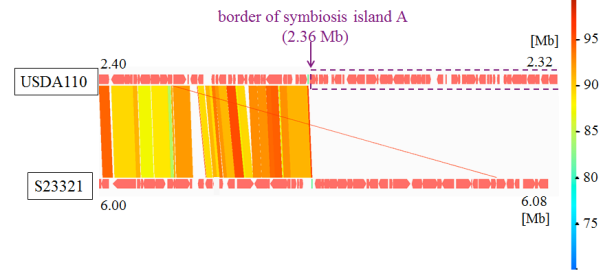

(d)

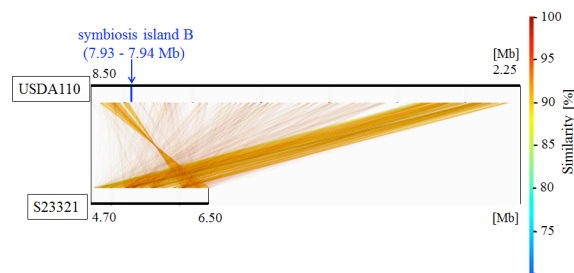

Fig. S2. Comparison of the genome sequences of strains S23321 and USDA110. The genome of *Bradyrhizobium* sp. S23321 was compared with that of *B. japonicum* USDA110 by the MUMmer (a) and GenomeMatcher programs (b–d). (a) Syntenic dot plot of *Bradyrhizobium* sp. strain S23321 (x-axis) and strain USDA110 (y-axis). The symbiosis islands in USDA110 are shown. Regions marked (b)–(d) are shown in detail below. (b) Alignment of the genome sequences of strains S23321 (6.47–6.64 Mb) and USDA110 (1.52–1.69 Mb). (c) Alignment of the genome sequences of strains S23321 (6.00–6.08 Mb) and USDA110 (2.32–2.40 Mb). (d) Alignment of the genome sequences of strains S23321 (4.70–6.50 Mb) and USDA110 (2.25–8.50 Mb).

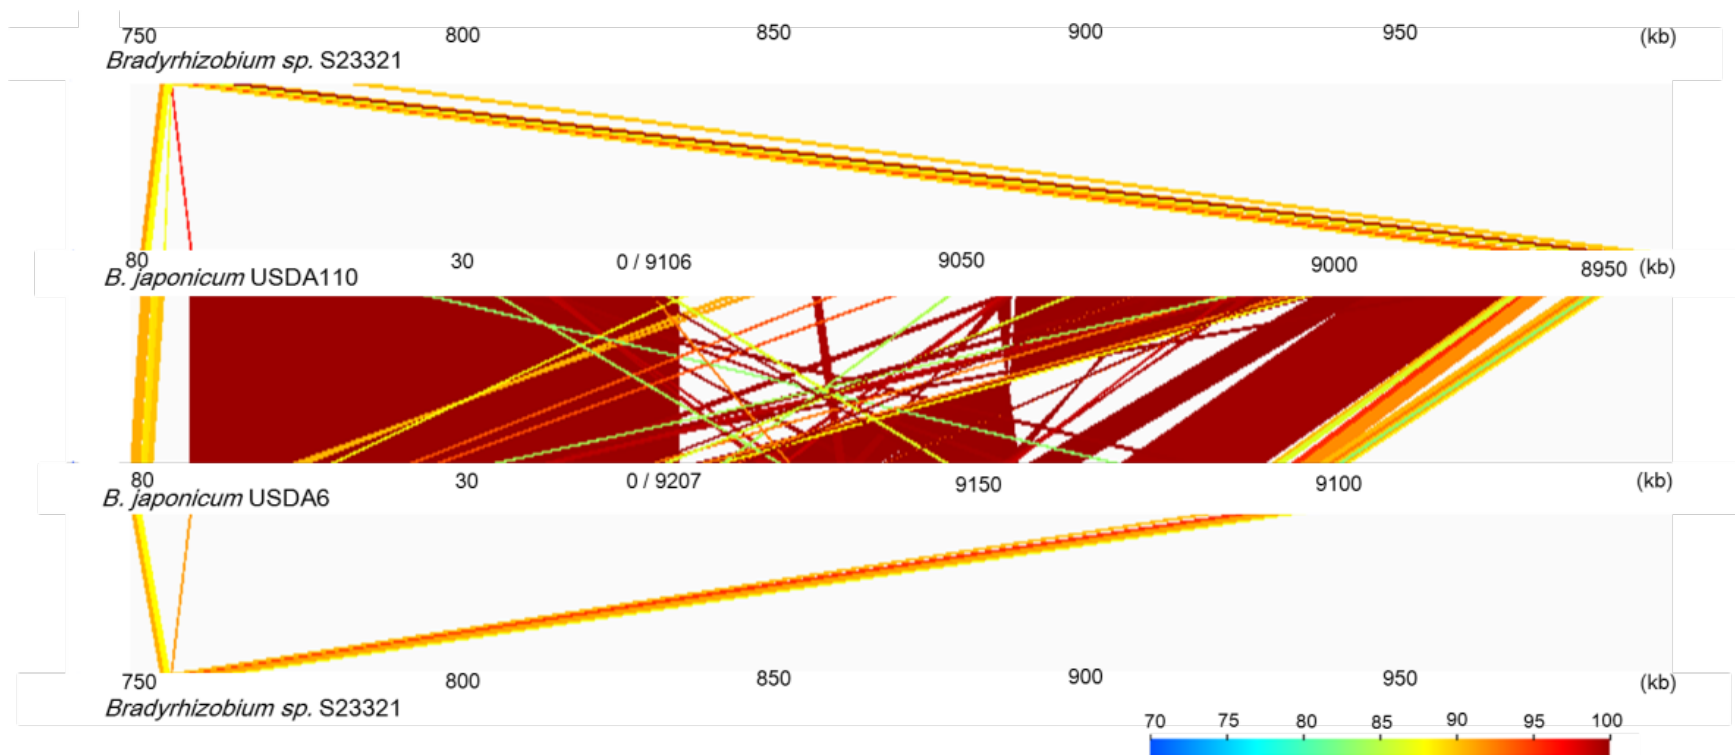

Fig. S3. Comparison of the S23321, USDA110, and USDA6 genome regions corresponding to the symbiosis island “Locus C” in the *B. japonicum* genome. The Locus C region of *B. japonicum* was highly conserved between USDA110 (8,974,971–0–70,365 bp) and USDA6 (9,113,996–0–70,356 bp). However, *Bradyrhizobium sp. S23321* lacks the Locus C region even though the boundary regions of Locus C are conserved at coordinate 775 kb. These results suggest that the ancestor of USDA110 and USDA6 acquired the Locus C region during its evolution.

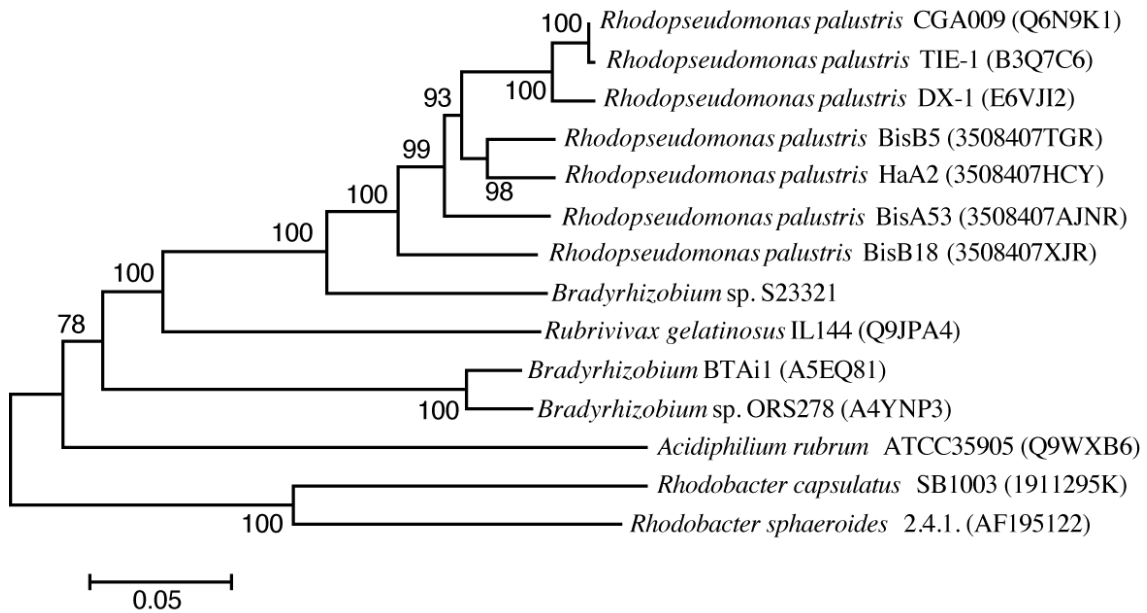

Fig. S4. Phylogenetic tree based on amino acid sequences of the bacteriochlorophyll biosynthesis enzyme BchH. The programs ClustalX (48) and MEGA (47) were used for the analysis. The tree was constructed by the neighbor-joining method, applying the p-distance parameter as a distance estimator. Gaps were omitted from the calculations. Bootstrap values are shown in the figure.

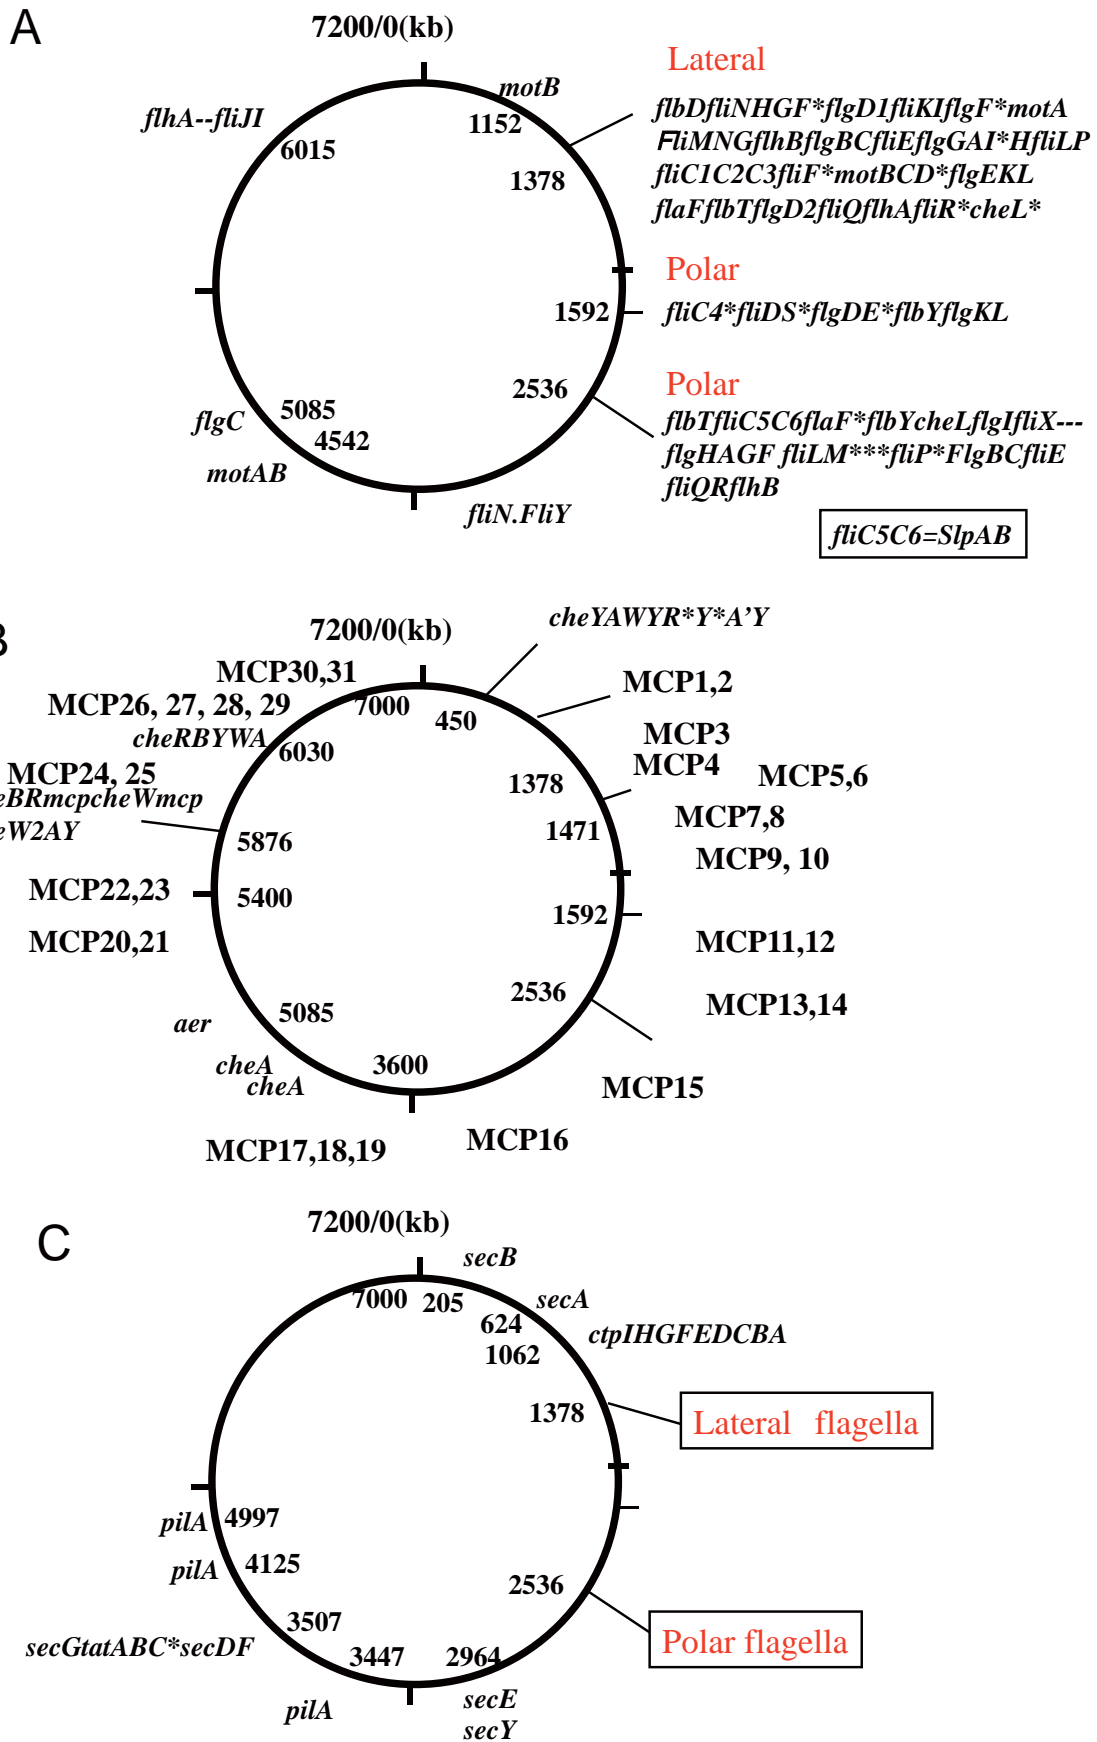

Fig. S5. Physical maps of genes for flagella (A), chemotaxis (B), and secretion (C) in the S23321 genome. The *pilA* gene (C) encodes a protein for type IV pilus. Asterisks denote ORFs encoding proteins with unknown function.

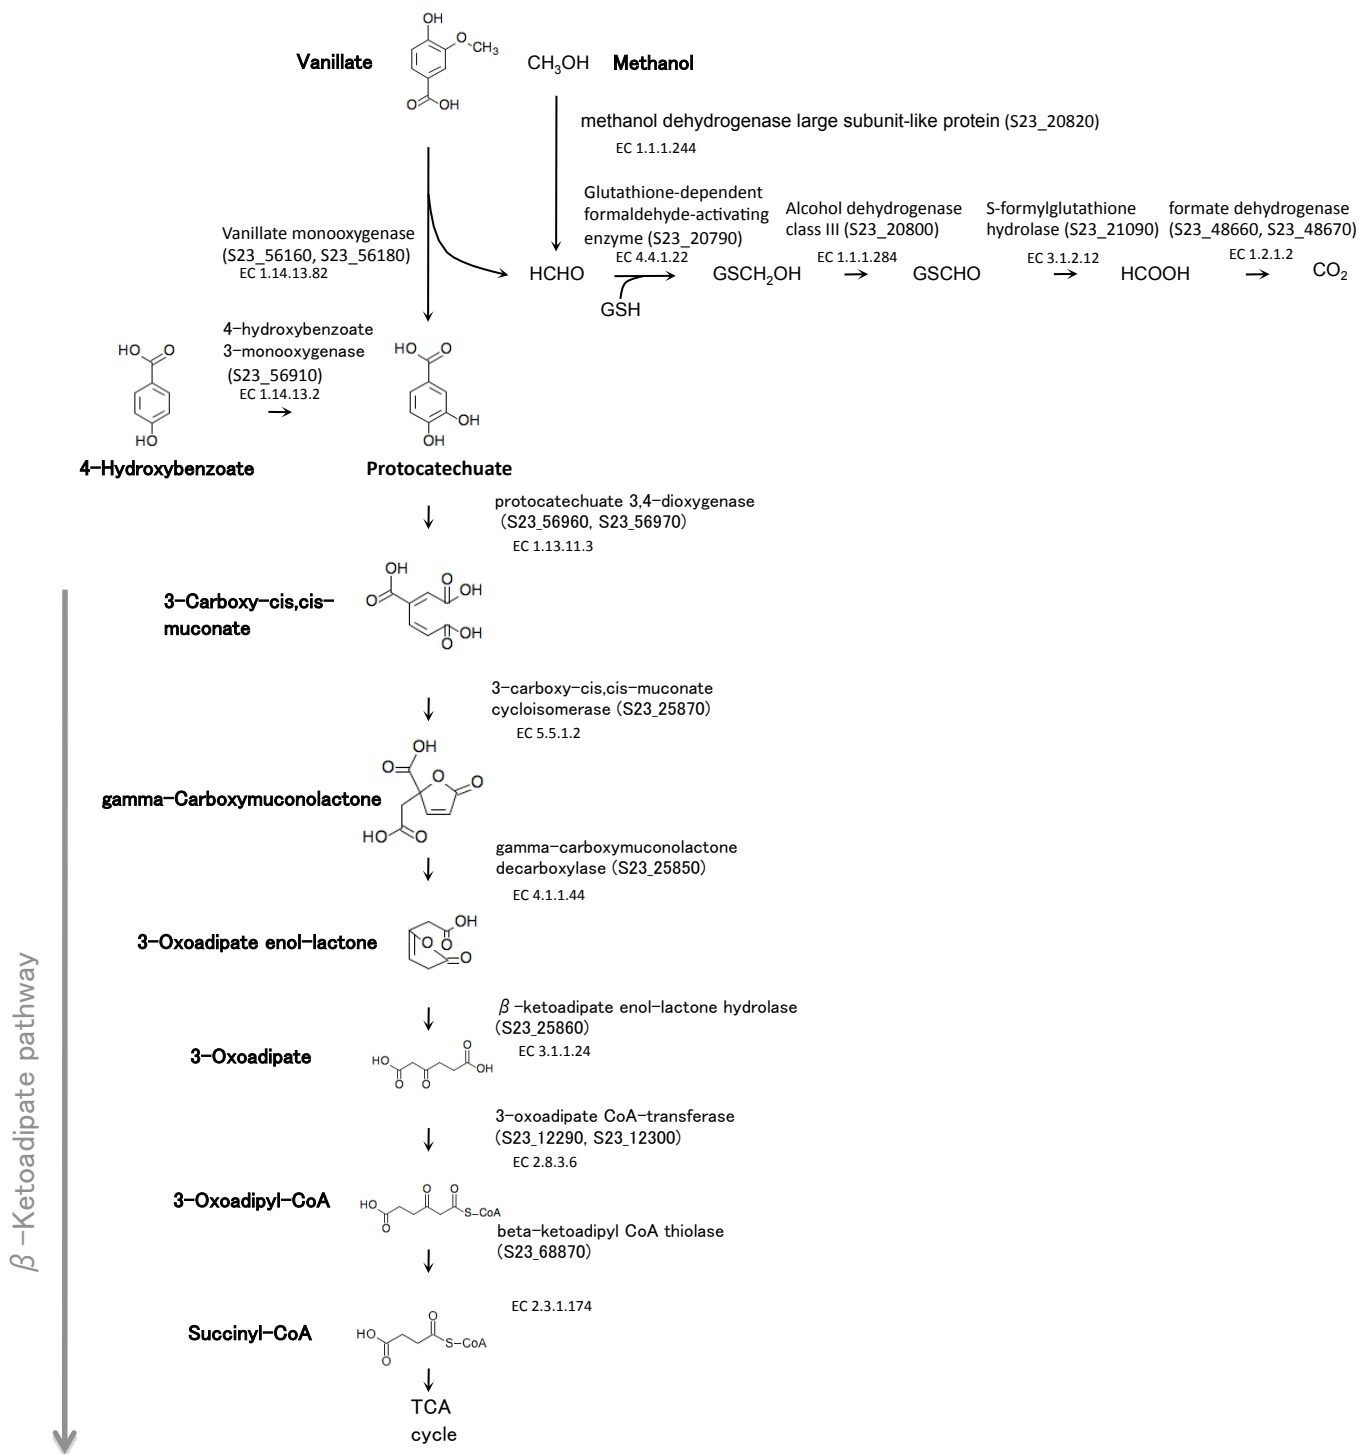

Fig. S6. Pathways and gene homologues from S23322 involved in the degradation of vanillate and 4-hydroxybenzoate.

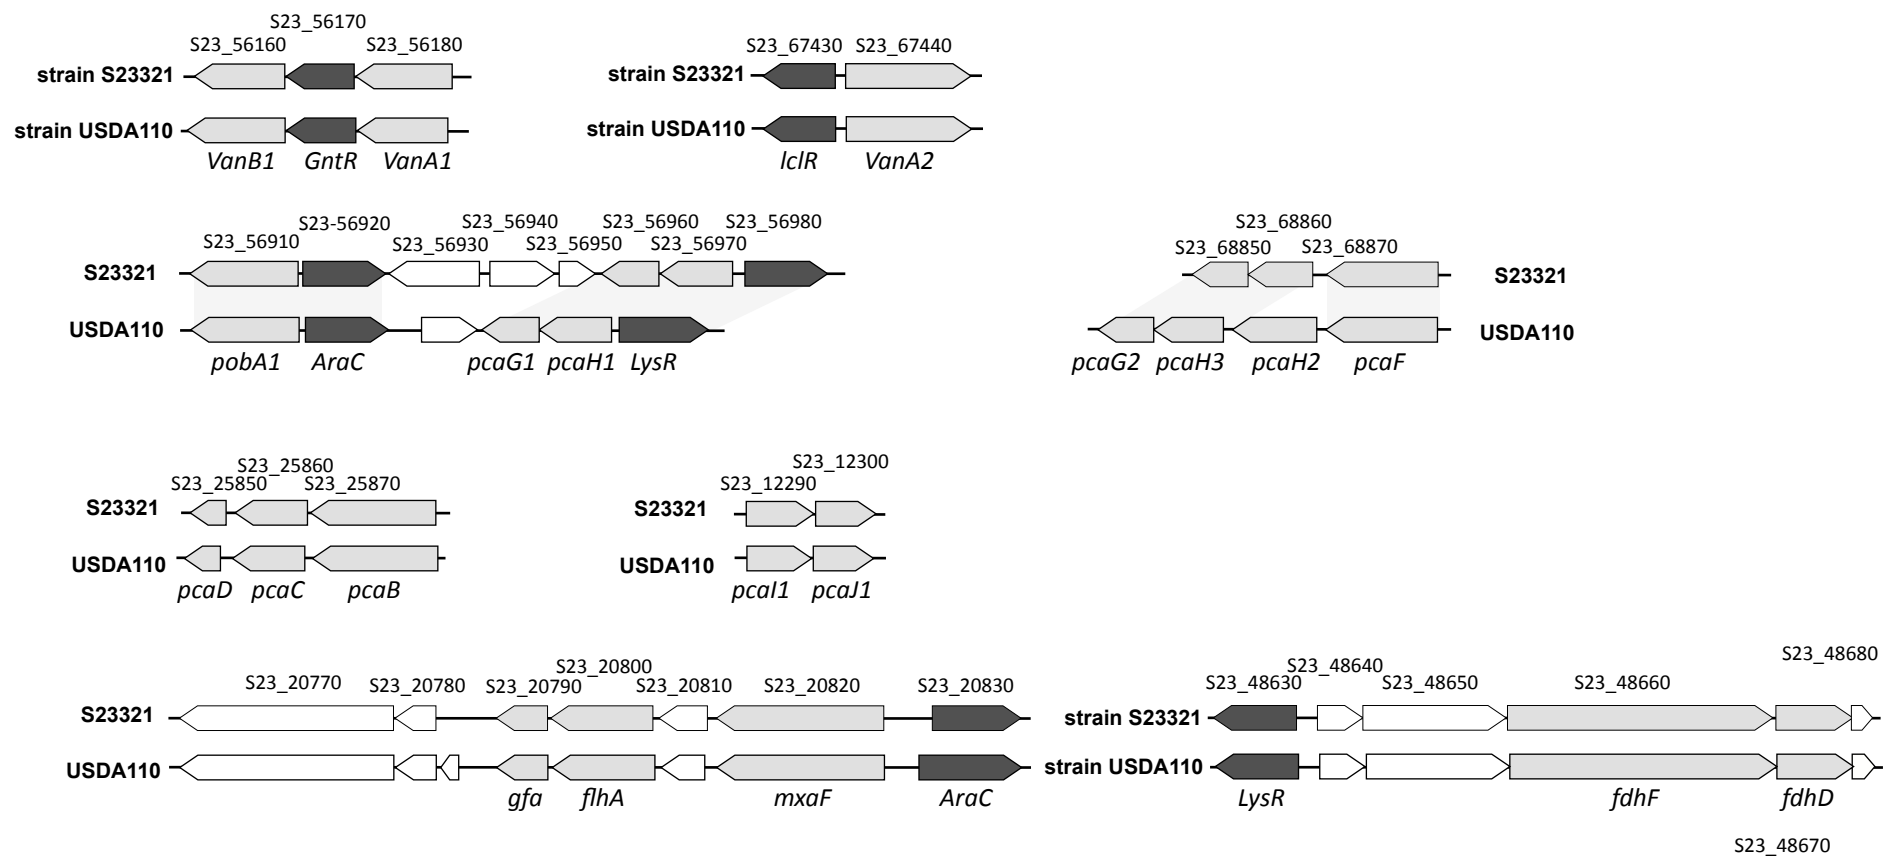

Fig. S7. Organization of genes involved in degrading vanillate, 4-hydroxybenzoate, and formaldehyde in the genomes of *Bradyrhizobium* sp. S23321 and *B. japonicum* USDA110. Gray and black arrows show degradation genes and regulatory genes, respectively.



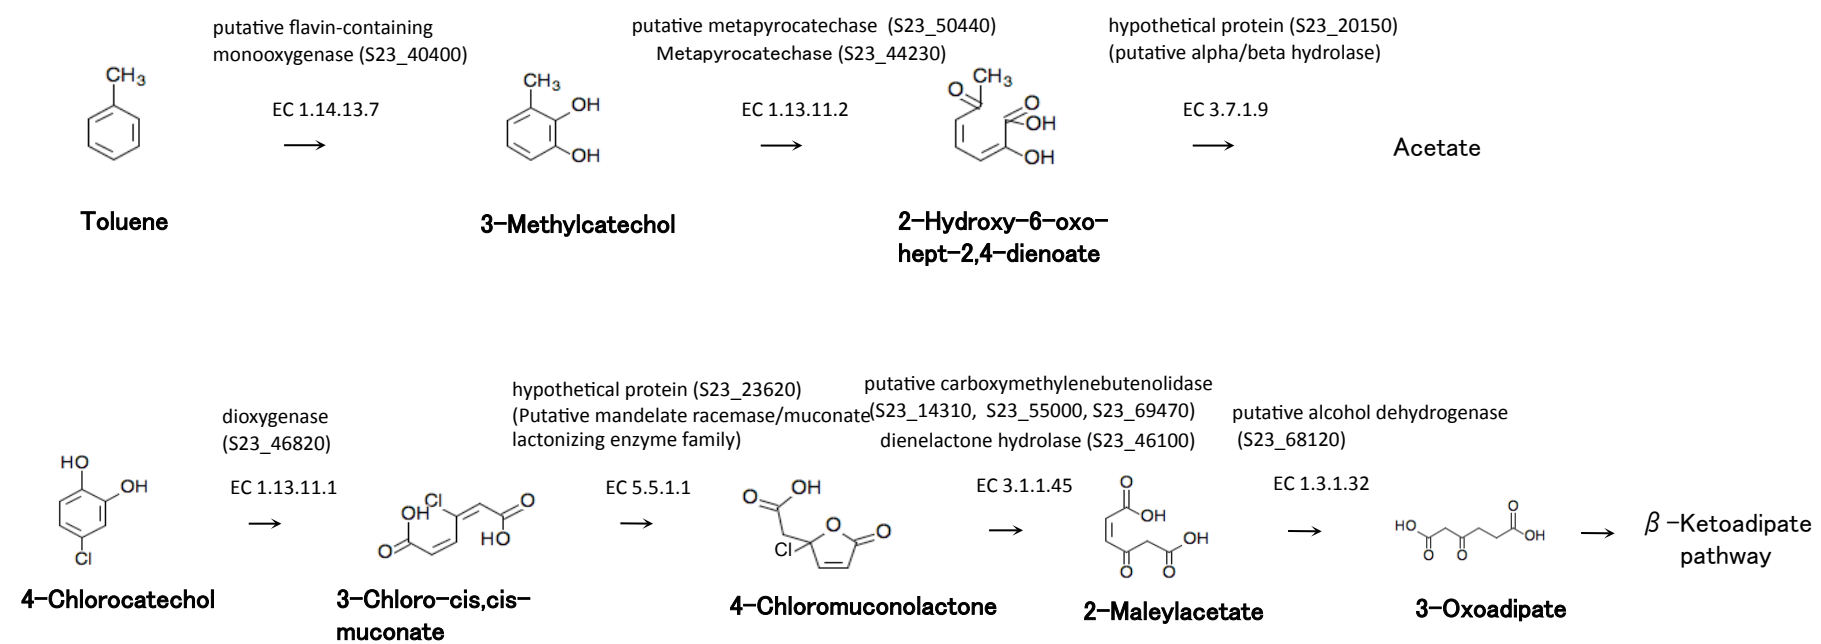

Fig. S8. Pathways and gene homologues from S23321 involved in the degradation of toluene and 4-chlorocatechol.

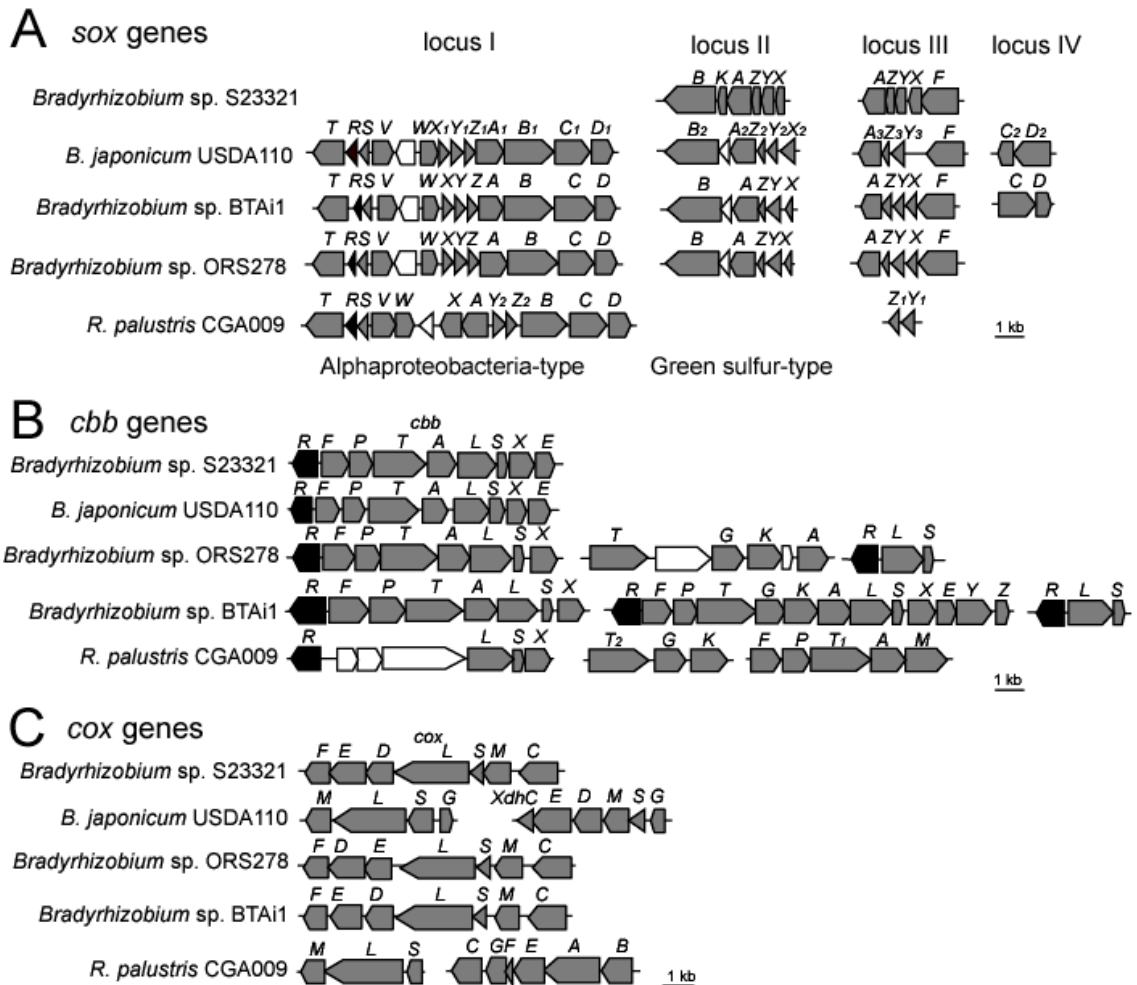

Fig. S9. Physical maps of the genes related to chemoautotrophic growth in the genome of *Bradyrhizobium* sp. S23321 and other members of the *Bradyrhizobiaceae* (*B. japonicum* USDA110, *Bradyrhizobium* sp. BTAi1, *Bradyrhizobium* sp. ORS278, and *Rhodopseudomonas palustris* CGA009). (A) *sox* genes, (B) *cbb* genes, (C) *cox* genes.

*Bradyrhizobium* sp. S23321 from=3447153, to=3447367  S23\_33590  
GGCACGCGATTTGCGACCATGCCTGCCAACGACACAGTGAGGATACGATC**ATG**AGAAACATTCTGAAGAA  
GTTTCATTGCCGACGAATCCGGGGCGACCGCGATCGAATACGGCCTGATCGCCGCCGGCATCGCGCTGGCG  
ATCATCACCGTCATCAACGGCATGGGCACCCGGCTCAGCACGAAATTCGGGTGATCAGCACGTCGCTGAA  
GTAG

*Bradyrhizobium* sp. S23321 from=4124816, to=4124596  S23\_40290  
CATTCTCGTGCGCCGGCAACGTCTGGTAGAGTTGGGAAAGGACACGGACT**GTG**AAATTGAAATGCCTGTT  
GGCCGAGTTTGCCGCCGATGAATCCGGCGCCACCGCGATCGAATACGGCCTGATCGCAGCGGCGATCGCG  
CTTGCGATCATCGAAGTGATCTATGCGCTCGGCACCAATCTCGTCGCCAAGCTGCAAGCGCTGGCGACGGC  
GCTGAAATAG

*Bradyrhizobium* sp. S23321 from=4995253, to=4995467  S23\_48860  
TCCGGAAACGATGCGGCCATGGATTTGGGCCGGATGAACAGGAGTTGGCA**ATG**CGTTTGATTAGGTCTTT  
CTTGCCGATGAGGCTGGCGCCACCGCCATCGAGTACGGCCTGATCGCCGCCGGCATTGCGCTTGCCATCG  
TGACCGTCGTGAACAACACGGGCAGCGCGCTCCTCAACAACAAATTCAACTCGATCAGTACGTCGCTGAAG  
TAG

Fig. S10. Putative SD (Shine-Dalgarno) sequences (underlined) of the three *pilA* genes in the S23321 genome. Start codons of the *pilA* genes are shown in red.

Table S1. Bacterial strains used for phylogenetic analysis.

| Strain                            | Accession no. of DNA sequence |          |             | Host plant or source          | Relevant characteristics                                                 | Reference |
|-----------------------------------|-------------------------------|----------|-------------|-------------------------------|--------------------------------------------------------------------------|-----------|
|                                   | 16S rRNA gene                 | ITS      | <i>nifH</i> |                               |                                                                          |           |
| <i>Bradyrhizobium japonicum</i>   |                               |          |             |                               |                                                                          |           |
| USDA110                           | AP005940                      | AB100749 | BA000040    | <i>Glycine max</i>            | Sovbean bradvrhizobia. <i>huv</i> <sup>+</sup> . <i>nos</i> <sup>+</sup> | 18        |
| NC6                               | AB231918                      | AB278126 | -           | <i>Glycine max</i>            | Sovbean bradvrhizobia. <i>huv</i> <sup>+</sup> . <i>nos</i> <sup>+</sup> | 41        |
| USDA122                           | AF208503                      | AB100751 | AB685466    | <i>Glycine max</i>            | Sovbean bradvrhizobia. <i>huv</i> <sup>+</sup> . <i>nos</i> <sup>+</sup> | 50        |
| NK2                               | AB070567                      | AB278127 | -           | <i>Glycine max</i>            | Sovbean bradvrhizobia. <i>huv</i> <sup>+</sup> . <i>nos</i> <sup>+</sup> | 40        |
| NC4                               | AB231917                      | AB278125 | -           | <i>Glycine max</i>            | Sovbean bradvrhizobia. <i>huv</i> <sup>+</sup> . <i>nos</i> <sup>+</sup> | 41        |
| USDA124                           | AF208505                      | AB100753 | -           | <i>Glycine max</i>            | Sovbean bradvrhizobia. <i>huv</i> <sup>-</sup> . <i>nos</i> <sup>-</sup> | 50        |
| USDA6 <sup>T</sup>                | U69638                        | AB100741 | AP012206    | <i>Glycine max</i>            | Sovbean bradvrhizobia. <i>huv</i> <sup>-</sup> . <i>nos</i> <sup>-</sup> | 50        |
| T7                                | AB231929                      | AB278128 | -           | <i>Glycine max</i>            | Sovbean bradvrhizobia. <i>huv</i> <sup>-</sup> . <i>nos</i> <sup>-</sup> | 41        |
| T9                                | AB231930                      | AB278129 | -           | <i>Glycine max</i>            | Sovbean bradvrhizobia. <i>huv</i> <sup>-</sup> . <i>nos</i> <sup>-</sup> | 41        |
| <i>Agromonas oligotrophica</i>    |                               |          |             |                               |                                                                          |           |
| S58                               | D78366                        | -        | -           | Rice rhizosphere              | Slow-growing oligotrophic bacteria                                       | 39        |
| G14130                            | AB003457                      | -        | -           | Pasture soil                  | Slow-growing oligotrophic bacteria                                       | 39        |
| <i>Bradyrhizobium</i> sp.         |                               |          |             |                               |                                                                          |           |
| BTAi1                             | D86354                        | -        | CP000494    | <i>Aeschynomene sensitiva</i> | Photosynthetic stem-nodulating bacteria                                  | 13        |
| ORS278                            | AJ133779                      | -        | CU234118    | <i>Aeschynomene indica</i>    | Photosynthetic stem-nodulating bacteria                                  | 13        |
| HW13                              | D89027                        | -        | -           | Hawaiian soil                 | 2.4-D-degrading bacteria <sup>1)</sup>                                   | 17        |
| HWK12                             | D89028                        | -        | -           | Hawaiian soil                 | 2.4-D-degrading bacteria <sup>1)</sup>                                   | 17        |
| <i>Rhodopseudomonas palustris</i> |                               |          |             |                               |                                                                          |           |
| CGA009                            | BX572607                      | -        | -           |                               | Photosynthetic bacteria                                                  | 20        |
| <i>Bradyrhizobium elkanii</i>     |                               |          |             |                               |                                                                          |           |
| USDA76 <sup>T</sup>               | U35000                        | -        | AB094963    | <i>Glycine max</i>            | Soybean bradyrhizobia                                                    | 50        |
| <i>Nitrobacter winogradskyi</i>   |                               |          |             |                               |                                                                          |           |
| Nb-255                            | CP000115                      | -        | -           |                               |                                                                          |           |
| <i>Blastobacter denitrificans</i> |                               |          |             |                               |                                                                          |           |
|                                   | AF338176                      | -        | -           |                               |                                                                          |           |

<sup>1)</sup> 2.4-D: 2.4-dichlorophenoxyacetic acid

Table S2. Comparison of flagella genes in several bradyrhizobial genomes

|                                        | gene  | S23321    | <i>Bradyrhizobium japonicum</i><br>USDA110 | <i>Bradyrhizobium</i> sp.<br>BTai1 | <i>Bradyrhizobium</i> sp.<br>ORS278 |
|----------------------------------------|-------|-----------|--------------------------------------------|------------------------------------|-------------------------------------|
| motor protein                          | MotB2 | S23_10870 | bl11510                                    | BBta_6939                          | BRADO1110                           |
| <b>Lateral flagella proteins</b>       |       |           |                                            |                                    |                                     |
| two-component response regulator       | F1bD  | S23_13020 | blr7003                                    | BBta_1872                          | BRADO5903                           |
| motor switch protein, C-ring component | F1iN  | S23_13030 | blr7002                                    | BBta_1873                          | BRADO5902                           |
| assembly protein                       | F1iH  | S23_13040 | blr7001                                    | BBta_1874                          | BRADO5901                           |
| motor switch protein, C-ring component | F1iG  | S23_13050 | blr7000                                    | BBta_1875                          | BRADO5900                           |
| MS-ring protein                        | F1iF  | S23_13060 | blr6999                                    | BBta_1876                          | BRADO5899                           |
| hook cap protein                       | F1gD1 | S23_13080 | blr6997                                    | BBta_1878                          | BRADO5897                           |
| Hook-length control protein            | F1iK  | S23_13090 | blr6996                                    | BBta_1880                          | BRADO5895                           |
| Flagellar Protein Export ATPase        | F1iI  | S23_13870 | blr6885                                    | -                                  | -                                   |
| basal body rod protein                 | F1gF  | S23_13880 | blr6884                                    | -                                  | -                                   |
| motor protein                          | MotA  | S23_13900 | bl16882                                    | -                                  | -                                   |
| motor switch protein, C-ring component | F1iM  | S23_13910 | bl16881                                    | -                                  | -                                   |
| motor switch protein, C-ring component | F1iN  | S23_13930 | bl16879                                    | -                                  | -                                   |
| motor switch protein, C-ring component | F1iG  | S23_13940 | bl16878                                    | -                                  | -                                   |
| Export apparatus protein               | F1hB  | S23_13950 | bl16877                                    | -                                  | -                                   |
| basal body rod protein                 | F1gB  | S23_13960 | bl16876                                    | -                                  | -                                   |
| basal body rod protein                 | F1gC  | S23_13970 | bl16875                                    | -                                  | -                                   |
| basal body rod protein                 | F1iE  | S23_13980 | bl16874                                    | -                                  | -                                   |
| basal body rod protein                 | F1gG  | S23_13990 | bl16873                                    | -                                  | -                                   |
| P-ring biosynthesis protein            | F1gA  | S23_14000 | bl16872                                    | -                                  | -                                   |
| basal body P-ring protein              | F1gI  | S23_14010 | bl16871                                    | -                                  | -                                   |
| basal body L-ring protein              | F1gH  | S23_14030 | bl16869                                    | -                                  | -                                   |
| Unknown function                       | F1iL  | S23_14040 | bl16868                                    | -                                  | -                                   |
| Export apparatus protein               | F1iP  | S23_14050 | bl16867                                    | -                                  | -                                   |
| Flagellin                              | F1iC1 | S23_14060 | bl16866                                    | -                                  | -                                   |
| Flagellin                              | F1iC2 | S23_14070 | -                                          | -                                  | -                                   |
| Flagellin                              | F1iC3 | S23_14080 | bl16865                                    | -                                  | -                                   |
| MS-ring protein                        | F1iF  | S23_14090 | bl16864                                    | -                                  | -                                   |
| motor protein                          | MotB  | S23_14110 | bl16862                                    | -                                  | -                                   |
| motor protein                          | MotC  | S23_14120 | bl16861                                    | -                                  | -                                   |
| motor protein                          | MotD  | S23_14130 | bl16860                                    | -                                  | -                                   |
| hook protein                           | F1gE  | S23_14150 | bl16858                                    | -                                  | -                                   |
| hook-associated protein, HAP1          | F1gK  | S23_14160 | bl16857                                    | -                                  | -                                   |
| hook-associated protein, HAP3          | F1gL  | S23_14170 | bl16856                                    | -                                  | -                                   |
| Flagellar assembly protein             | F1aF  | S23_14180 | bl16855                                    | -                                  | -                                   |
| flagellar biosynthesis repressor       | F1bT  | S23_14190 | bl16854                                    | -                                  | -                                   |
| Hook cap protein                       | F1gD2 | S23_14200 | bl16853                                    | -                                  | -                                   |
| Export apparatus protein               | F1iQ  | S23_14210 | bsl6852                                    | -                                  | -                                   |
| Export apparatus protein               | F1hA  | S23_14220 | bl16851                                    | -                                  | -                                   |
| Export apparatus protein               | F1iR  | S23_14230 | bl16850                                    | -                                  | -                                   |
| Unknown function                       | CheL  | S23_14250 | bl16849                                    | -                                  | -                                   |
| flagellin                              | F1iC4 | S23_15090 | blr3695                                    | BBta_3159                          | BRADO4890                           |
| Flagella cap protein, HAP2             | F1iD  | S23_15110 | blr3696                                    | BBta_3160                          | BRADO4889                           |
| Flagellin chaperon                     | F1iS  | S23_15120 | blr3697                                    | BBta_3161                          | BRADO4888                           |
| Hook cap protein                       | F1gD  | S23_15150 | blr3699                                    | BBta_3164                          | BRADO4885                           |
| hook protein F1gE                      | F1gE  | S23_15160 | blr3700                                    | BBta_3165                          | BRADO4884                           |
| Unknown function                       | F1bY  | S23_15180 | blr3702                                    | BBta_3167                          | BRADO4882                           |
| hook-associated protein, HAP1          | F1gK  | S23_15190 | blr3703                                    | BBta_3168                          | BRADO4881                           |

|                                        |           |           |         |           |           |
|----------------------------------------|-----------|-----------|---------|-----------|-----------|
| hook-associated protein, HAP3          | FlgL      | S23_15200 | blr3704 | BBta_3169 | BRADO4880 |
| <b>Polar flagellar proteins</b>        |           |           |         |           |           |
| biosynthesis repressor                 | FliB      | S23_24010 | blr5847 | BBta_5529 | BRADO5057 |
| Flagellin, S-layer protein             | FliC5     | S23_24020 | blr5846 | BBta_5528 | BRADO5056 |
| Flagellin, S-layer protein             | FliC6     | S23_24030 | blr5845 | BBta_5527 | BRADO5055 |
| biosynthesis regulatory protein        | FliF      | S23_24040 | blI5842 | BBta_5526 | BRADO5054 |
| Unknown function                       | fliY      | S23_24070 | blr5840 | BBta_5522 | BRADO5052 |
| Unknown function                       | cheL      | S23_24080 | blr5839 | BBta_5521 | BRADO5051 |
| basal body P-ring protein              | FlgI      | S23_24090 | blr5838 | BBta_5520 | BRADO5050 |
| assembly regulator FliX                | FliX      | S23_24100 | blI5837 | BBta_5519 | BRADO5049 |
| basal body L-ring protein              | FlgH      | S23_24170 | blr5830 | BBta_5512 | BRADO5040 |
| basal body P-ring biosynthesis protein | FlgA      | S23_24180 | blr5829 | BBta_5511 | BRADO5039 |
| basal body rod protein                 | FlgG      | S23_24190 | blr5828 | BBta_5510 | BRADO5038 |
| basal body rod protein                 | FlgF      | S23_24200 | blr5827 | BBta_5509 | BRADO5037 |
| basal body-associated protein          | FliL      | S23_24210 | blI5826 | BBta_5508 | BRADO5036 |
| motor switch protein, C-ring component | FliM      | S23_24220 | blI5825 | BBta_5507 | BRADO5035 |
| biosynthesis protein                   | FliP      | S23_24270 | blr5816 | BBta_5499 | BRADO5031 |
| Flagellar protein, unknown function    | ?         | S23_24280 | blr5815 | BBta_5498 | BRADO5030 |
| basal body rod protein                 | FlgB      | S23_24290 | blI5814 | BBta_5497 | BRADO5029 |
| basal body rod protein                 | FlgC      | S23_24300 | blI5813 | BBta_5496 | BRADO5028 |
| basal body rod protein                 | FliE      | S23_24310 | blI5812 | BBta_5495 | BRADO5027 |
| Export apparatus protein               | FliQ      | S23_24320 | bsI5811 | BBta_5494 | BRADO5026 |
| Export apparatus protein               | FliR      | S23_24330 | blI5810 | BBta_5493 | BRADO5025 |
| Export apparatus protein               | FliH      | S23_24340 | blI5809 | BBta_5492 | BRADO5024 |
| motor switch protein, C-ring component | FliN/FliY | S23_30290 | bsI5256 | BBta_4891 | -         |
| Motor protein                          | MotB      | S23_44480 | blr3801 | BBta_3511 | BRADO4686 |
| Motor protein                          | MotA      | S23_44490 | blr3800 | BBta_3510 | BRADO4687 |
| basal-body rod protein                 | FlgC      | S23_48230 | blr3174 | -         | -         |
| Export apparatus protein               | FliA      | S23_58150 | blI2207 | BBta_6527 | BRADO1503 |
| Flagellar assembly protein             | FliJ      | S23_58210 | blr2202 | BBta_6531 | BRADO1499 |
| Flagellar Protein Export ATPase        | FliI      | S23_58220 | blr2201 | BBta_6532 | BRADO1498 |

-, no related gene



Table S4. Comparison of genes related to stress response in S23321 and its relatives

|                                                       | S23321    | <i>Bradyrhizobium japonicum</i> USDA110 | <i>Bradyrhizobium</i> sp. BTAi1 | <i>Bradyrhizobium</i> sp. ORS278 | <i>Rhodopseudomonas palustris</i> CGA009 |
|-------------------------------------------------------|-----------|-----------------------------------------|---------------------------------|----------------------------------|------------------------------------------|
| <b><u>Oxidative stress</u></b>                        |           |                                         |                                 |                                  |                                          |
| catalase-peroxidase ( <i>katG</i> )                   | S23_00520 | blr0778                                 | BBta_6389                       | BRADO1666                        | RPA0429                                  |
| Fe/Mn containing superoxide dismutase ( <i>sodB</i> ) | S23_68490 | bll7774                                 | BBta_1335                       | BRADO6273                        | RPA1693                                  |
| Fe/Mn containing superoxide dismutase ( <i>chrC</i> ) | -         | bll7559                                 | -                               | -                                | -                                        |
| Cu-Zn containing superoxide dismutase ( <i>sodC</i> ) | -         | -                                       | -                               | -                                | RPA0225*                                 |
| organic hydroperoxide resistance protein              | S23_01000 | bll0735                                 | BBta_0109                       | BRADO0102                        | RPA0829                                  |
| thioredoxin peroxidase                                | S23_29710 | blr5308                                 | BBta_4916                       | BRADO3235                        | RPA2443                                  |
| thioredoxin reductase                                 | S23_59830 | blr7381                                 | BBta_6803                       | BRADO1321                        | RPA4075                                  |
| thioredoxin reductase                                 | S23_65440 | blr1248                                 | BBta_0894                       | BRADO6640                        | RPA4536                                  |
| peroxiredoxin                                         | S23_64840 | bll1317                                 | BBta_0951                       | BRADO6585                        | RPA4268                                  |
| glutathione peroxidase                                | S23_15810 | bll6732                                 | BBta_6295                       | BRADO5788                        | RPA3627*                                 |
| glutathione reductase                                 | S23_44920 | blr3757                                 | BBta_3485                       | BRADO4712                        | RPA1983*                                 |
| catalase                                              | S23_39650 | -                                       | -                               | -                                | RPA3310                                  |
| <b><u>Heat shock / chaperone</u></b>                  |           |                                         |                                 |                                  |                                          |
| 60kDa chaperonin ( <i>groEL1</i> )                    | S23_49080 | blr5227                                 | BBta_3034                       | BRADO2697                        | -                                        |
| 10kDa chaperonin ( <i>groES1</i> )                    | S23_49090 | blr5226                                 | BBta_3033                       | BRADO2696                        | -                                        |



|                                       |           |         |            |            |         |
|---------------------------------------|-----------|---------|------------|------------|---------|
| 60kDa chaperonin ( <i>groEL2</i> )    | -         | blr6979 | -          | -          | -       |
| 10kDa chaperonin ( <i>groES2</i> )    | -         | blr6978 | -          | -          | -       |
| 60kDa chaperonin ( <i>groEL3</i> )    | -         | bll2059 | -          | -          | -       |
| 10kDa chaperonin ( <i>groES3</i> )    | -         | bll2060 | -          | -          | -       |
| 60kDa chaperonin ( <i>groEL4</i> )    | S23_26250 | blr5626 | BBta_5285  | BRADO2892  | RPA2164 |
| 10kDa chaperonin ( <i>groES4</i> )    | S23_26260 | blr5625 | BBta_5284  | BRADO2893  | RPA2165 |
| 60kDa chaperonin ( <i>groEL5</i> )    | S23_61650 | blr7533 | BBta_1671  | BRADO6115  | RPA1140 |
| 10kDa chaperonin ( <i>groES5</i> )    | S23_61640 | bsr7532 | BBta_1672  | BRADO6114  | RPA1141 |
| 60kDa chaperonin ( <i>groEL</i> )     | -         | blr4635 | -          | -          | -       |
| 60kDa chaperonin ( <i>groEL</i> )     | -         | blr3683 | BBta_3636  | BRADO4344  | -       |
| heat shock protein 90 ( <i>htpG</i> ) | S23_63530 | bll7789 | BBta_1326  | BRADO6296  | RPA4815 |
| heat shock protein 70 ( <i>dnaK</i> ) | S23_01580 | blr0678 | BBta_0191  | BRADO0164  | RPA0333 |
| Hsp70 family molecular chaperone      | S23_48490 | blr3152 | -          | -          | -       |
| heat shock protein 40 ( <i>dnaJ</i> ) | S23_01560 | blr0680 | BBta_0192  | BRADO0163  | RPA0334 |
| heat shock protein 40 ( <i>dnaJ</i> ) | S23_53380 | blr2626 | BBta_2465  | BRADO2148  | RPA1198 |
| heat shock protein 33 ( <i>hslO</i> ) | S23_67190 | blr1100 | BBta_0761  | BRADO6776  | PRA4771 |
| HspC2 heat shock protein              | S23_17570 | blr7961 | BBta_3527* | BRADO4666* | -       |
| heat shock protein Hsp20              | S23_49060 | -       | -          | -          | -       |
| cytoplasmic chaperone ( <i>torD</i> ) | S23_13140 | -       | -          | -          | -       |
| <b><u>Cold shock</u></b>              |           |         |            |            |         |
| cold shock protein ( <i>cspA</i> )    | S23_10090 | bsl1445 | BBta_7022  | BRADO1028  | RPA9073 |
| cold shock protein ( <i>cspA</i> )    | S23_42620 | bsl3986 | -          | -          | RPA3672 |
| cold shock protein ( <i>cspA</i> )    | S23_41350 | bsl4127 | BBta_3854  | BRADO3346  | RPA3053 |

---

|                                                  |           |         |            |            |          |
|--------------------------------------------------|-----------|---------|------------|------------|----------|
| cold shock protein ( <i>cspA</i> )               | S23_48460 | bsr3154 | BBra_7552  | BRADO0631  | RPA3399  |
| cold shock protein ( <i>cspA</i> )               | S23_58830 | bsr7259 | BBta_6679  | BRADO1429  | -        |
| cold shock protein ( <i>cspA</i> )               | S23_37850 | blr4410 | BBta_4038  | BRADO3673  | RPA2525  |
| cold shock protein ( <i>cspA</i> )               | S23_35160 | bsl4595 | BBta_7022  | BRADO1028  | -        |
| cold shock protein ( <i>cspA</i> )               | S23_60990 | bsr7468 | BBta_1730  | BRADO6053  | RPA1173  |
| cold shock dead-box protein A<br>( <i>csdA</i> ) | S23_26940 | bll5562 | BBta_4919* | BRADO3233* | RPA4001* |

---

### **Osmotic stress**

|                                                                                                                       |            |          |            |           |          |
|-----------------------------------------------------------------------------------------------------------------------|------------|----------|------------|-----------|----------|
| betaine aldehyde dehydrogenase                                                                                        | S23_62250* | blr3776* | BBta_3841* | -         | RPA0112* |
| choline dehydrogenase ( <i>cdh</i> ) /<br>choline oxidase ( <i>cox</i> )                                              | -          | -        | BBta_6705  | BRADO1398 | -        |
| glycine sarcosine methyltransferase<br>( <i>gsm</i> ) / sarcosine dimethylglycine<br>methyltransferase ( <i>sdm</i> ) | -          | -        | -          | -         | -        |

---

### **Desiccation**

|                                                      |           |         |            |            |          |
|------------------------------------------------------|-----------|---------|------------|------------|----------|
| Trehalose-6-phosphate synthetase<br>( <i>otsA</i> )  | S23_05080 | bll0322 | BBta_0578  | BRADO6952  | RPA4660  |
| Trehalose-6-phosphate phosphatase<br>( <i>otsB</i> ) | S23_05070 | bll0323 | BBta_0577  | BRADO6953  | RPA4661  |
| Trehalose synthase ( <i>treS</i> )                   | S23_15460 | blr6767 | BBta_6322* | BRADO5816* | RPA3643* |
| Maltooligosyltrehalose synthase<br>( <i>treY</i> )   | S23_15420 | blr6771 | BBta_6326* | BRADO5820* | RPA3647* |

---

**pH-adaptation**

|                                                               |   |   |   |   |         |
|---------------------------------------------------------------|---|---|---|---|---------|
| pH-adaptive potassium efflux system component ( <i>phaA</i> ) | - | - | - | - | RPA2789 |
| pH-adaptive potassium efflux system component ( <i>phaC</i> ) | - | - | - | - | RPA2790 |
| pH-adaptive potassium efflux system component ( <i>phaD</i> ) | - | - | - | - | RPA2791 |
| pH-adaptive potassium efflux system component ( <i>phaE</i> ) | - | - | - | - | RPA2792 |
| pH-adaptive potassium efflux system component ( <i>phaF</i> ) | - | - | - | - | RPA2793 |
| pH-adaptive potassium efflux system component ( <i>phaG</i> ) | - | - | - | - | RPA2794 |

---

**Organic solvents**

|                                   |            |          |            |           |          |
|-----------------------------------|------------|----------|------------|-----------|----------|
| organic solvent tolerance protein | S23_41570* | bll4105* | BBta_3829* | BRADO3325 | RPA3063* |
|-----------------------------------|------------|----------|------------|-----------|----------|

---

**Arsenic / cyanate toxicity**

|                                    |           |          |            |            |         |
|------------------------------------|-----------|----------|------------|------------|---------|
| arsenate reductase ( <i>arsC</i> ) | S23_49150 | bll3086* | BBta_5577* | BRADO5106* | RPA3555 |
| arsenite efflux pump               | S23_49160 | bll3085  | BBta_5576* | -          | RPA3553 |
| arsenate reductase ( <i>arsC</i> ) | S23_49170 | bll3084  | -          | -          | RPA3554 |
| arsenate reductase ( <i>arsC</i> ) | -         | -        | BBta_4662  | BRADO4444  | RPA2257 |
| arsenical pump membrane protein    | -         | -        | -          | -          | RPA2258 |

---

|                                                                     |           |         |            |            |          |
|---------------------------------------------------------------------|-----------|---------|------------|------------|----------|
| arsenical pump membrane protein<br>( <i>arsB</i> )                  | S23_30120 | blr5272 | Bbta_4911* | BRADO3240* | RPA3398  |
| Cyanate hydratase ( <i>cynS</i> )                                   | S23_25190 | bll5731 | Bbta_5412  | BRADO2774  | RPA2115* |
| Cyanate transporter ( <i>cynX</i> )                                 | -         | -       | -          | -          | -        |
| <b><u>Regulated degradative capacity</u></b>                        |           |         |            |            |          |
| <i>clpA</i>                                                         | S23_30570 | bll5153 | BBta_4772  | BRADO4545  | RPA3147  |
| <i>clpB</i>                                                         | S23_63890 | blr1404 | BBta_1195  | BRADO6450  | RPA4433  |
| <i>lon</i>                                                          | S23_32420 | bll4942 | BBta_4570  | BRADO4196  | RPA2959  |
| <i>lon</i>                                                          | S23_21210 | blr6174 | BBta_7794  | -          | -        |
| <b><u>DNA repair</u></b>                                            |           |         |            |            |          |
| <i>recA</i>                                                         | S23_24880 | bll5755 | BBta_5453  | BRADO4985  | RPA3851  |
| single-strand DNA binding protein<br>RecBCD nuclease ( <i>ssb</i> ) | S23_34570 | bll4698 | BBta_4373  | BRADO4002  | RPA2814  |
| <i>recG</i>                                                         | S23_35130 | blr4603 | BBta_4159  | BRADO3769  | RPA2662  |
| <i>recF</i>                                                         | S23_00030 | bll0827 | BBta_0004  | BRADO0003  | RPA0003  |
| <i>recJ</i>                                                         | S23_39020 | blr4377 | BBta_4000* | BRADO3577* | RPA2508  |
| <i>recO</i>                                                         | S23_31530 | bll5058 | BBta_4680* | BRADO4460* | RPA2700  |
| <i>recQ</i>                                                         | S23_05650 | bll0242 | BBta_6924  | BRADO1125  | RPA4826  |
| <i>ruvA</i>                                                         | S23_11140 | blr1536 | BBta_6908  | BRADO1145  | RPA1100  |
| <i>ruvB</i>                                                         | S23_11160 | blr1537 | BBta_6906  | BRADO1147  | RPA1102  |
| <i>uvrA</i>                                                         | S23_34520 | blr4702 | BBta_4379  | BRADO4010  | RPA2816  |
| <i>uvrB</i>                                                         | S23_60490 | blr7431 | BBta_1782  | BRADO5995  | RPA4343  |

|                                                |  |           |         |            |            |          |
|------------------------------------------------|--|-----------|---------|------------|------------|----------|
| <i>uvrC</i>                                    |  | S23_61010 | blr7470 | BBta_1728  | BRADO6055  | RPA1171  |
| <i>uvrD</i>                                    |  | S23_28240 | blr5493 | BBta_7513* | BRADO0671* | RPA2802* |
| <i>mutS</i>                                    |  | S23_68880 | bll0924 | BBta_7642  | BRADO0537  | RPA0512  |
| <i>mutL</i>                                    |  | S23_61250 | blr7493 | BBta_1703  | BRADO6079  | RPA4371  |
| <i>mutH</i>                                    |  | -         | -       | -          | -          | -        |
| Dps family DNA-binding stress response protein |  | S23_59760 | bll7374 | BBta_6797* | BRADO1329* | RPA1274  |

### **Storage compounds**

|                                                 |  |            |          |            |            |          |
|-------------------------------------------------|--|------------|----------|------------|------------|----------|
| poly-3-hydroxybutyrate synthase ( <i>phbC</i> ) |  | S23_39220  | bll4360  | BBta_3992  | BRADO3568  | RPA2501  |
| poly-3-hydroxybutyrate synthase ( <i>phbC</i> ) |  | S23_22030  | bll6073  | BBta_5757* | BRADO5310* | RPA4243* |
| acetoacetyl CoA reductase ( <i>phbB</i> )       |  | S23_05770  | bll0225  | BBta_7613  | BRADO0563  | RPA0532  |
| acetyl-CoA acetyltransferase                    |  | S23_05760  | bll0226  | BBta_7614  | BRADO0562  | RPA0531  |
| PHB depolymerase                                |  | S23_69010* | blr0908* | BBta_7656* | BRADO0519* | RPA0575* |
| polyphosphate kinase                            |  | S23_41400  | bll4122  | BBta_3849* | BRADO3341* | RPA3048* |
| Ppx/GppA family phosphatase                     |  | S23_41410* | bll4121* | BBta_3848* | BRADO3340* | RPA3047* |
| glucose-1-phosphate adenylyltransferase         |  | S23_18760  | blr6458  | BBta_0922  | BRADO6613  | RPA0381  |
| glycogen synthase                               |  | S23_18750  | blr6459  | BBta_0923  | BRADO6612  | RPA0382* |
| glycogen synthase                               |  | S23_52210  | bll2778  | BBta_2800  | BRADO2453  | -        |
| glycogen debranching enzyme                     |  | S23_15440  | blr6769  | BBta_6324  | BRADO5818  | RPA3645  |
| glycogen debranching enzyme                     |  | S23_50600  | -        | BBta_5568  | BRADO5096  | RPA3311  |

---

**Sigma factors**

|                          |            |          |            |            |          |
|--------------------------|------------|----------|------------|------------|----------|
| sigma 70 ( <i>rpoD</i> ) | S23_59500  | bll7349  | BBta_6775  | BRADO1354  | RPA1288  |
| sigma 54 ( <i>rpoN</i> ) | S23_01100  | blr0723  | BBta_0121  | BRADO0113  | RPA0050  |
| sigma 54 ( <i>rpoN</i> ) | -          | blr1883  | -          | -          | -        |
| sigma 32 ( <i>rpoH</i> ) | S23_59360  | blr7337  | BBta_6760  | BRADO1371  | RPA0367  |
| sigma 24 ( <i>rpoE</i> ) | S23_63580  | blr7797  | BBta_7003  | BRADO1047  | RPA4225* |
| ECF sigma                | S23_49620  | blr3038  | BBta_3007* | BRADO2666* | RPA1813* |
| ECF sigma                | S23_15080* | blr3694* | BBta_3158* | BRADO4891* | RPA0639* |
| ECF sigma                | S23_49550* | blr3042* | BBta_3011* | BRADO2670* | RPA1819* |
| ECF sigma                | S23_67780  | bll1028  | BBta_0709  | BRADO6834  | RPA4792* |
| ECF sigma                | S23_58200* | blr2203* | BBta_6530  | BRADO1500  | RPA1635* |
| ECF sigma                | S23_18500  | bll6484  | -          | -          | -        |
| ECF sigma                | S23_53360  | bll2628  | BBta_2467  | BRADO2150  | -        |
| ECF sigma                | S23_49840  | bll3014* | BBta_2977* | BRADO2637* | -        |
| ECF sigma                | -          | blr4928  | -          | -          | -        |

---

\*, gene definition is "putative".

-, no related gene

Table S5. Genes for respiratory chains in the S23321 genome.

| Complex I                                                                   | ID        | Gene name   | Product                                                             | Closest gene                                                                                | AA Identity (%) |
|-----------------------------------------------------------------------------|-----------|-------------|---------------------------------------------------------------------|---------------------------------------------------------------------------------------------|-----------------|
| NADH dehydrogenase                                                          | S23_32620 | <i>nuoA</i> | NADP ubiquinone oxidoreductase chain A                              | NADP ubiquinone oxidoreductase chain A (bli4919) of <i>B. japonicum</i> USDA110             | 92.6            |
|                                                                             | S23_32630 | <i>nuoB</i> | NADP ubiquinone oxidoreductase chain B                              | NADP ubiquinone oxidoreductase chain B (bli4918) of <i>B. japonicum</i> USDA110             | 95.4            |
|                                                                             | S23_32640 | <i>nuoC</i> | NADP ubiquinone oxidoreductase chain C                              | NADP ubiquinone oxidoreductase chain C (bli4917) of <i>B. japonicum</i> USDA110             | 88.7            |
|                                                                             | S23_32650 | <i>nuoD</i> | NADP ubiquinone oxidoreductase chain D                              | NADP ubiquinone oxidoreductase chain D (bli4916) of <i>B. japonicum</i> USDA110             | 94.5            |
|                                                                             | S23_32670 |             | NADH-ubiquinone oxidoreductase chain E                              | NADP ubiquinone oxidoreductase chain E (bli4914) of <i>B. japonicum</i> USDA110             | 95.6            |
|                                                                             | S23_32690 | <i>nuoF</i> | NADP ubiquinone oxidoreductase chain F                              | NADP ubiquinone oxidoreductase chain F (bli4912) of <i>B. japonicum</i> USDA110             | 95.5            |
|                                                                             | S23_32700 | <i>nuoG</i> | NADP ubiquinone oxidoreductase chain G                              | NADP ubiquinone oxidoreductase chain G (bli4911) of <i>B. japonicum</i> USDA110             | 92.6            |
|                                                                             | S23_32710 | <i>nuoH</i> | NADP ubiquinone oxidoreductase chain H                              | NADP ubiquinone oxidoreductase chain H (bli4910) of <i>B. japonicum</i> USDA110             | 88.7            |
|                                                                             | S23_32720 | <i>nuoI</i> | NADP ubiquinone oxidoreductase chain I                              | NADP ubiquinone oxidoreductase chain I (bli4909) of <i>B. japonicum</i> USDA110             | 96.3            |
|                                                                             | S23_32730 | <i>nuoJ</i> | NADP ubiquinone oxidoreductase chain J                              | NADP ubiquinone oxidoreductase chain J (bli4908) of <i>B. japonicum</i> USDA110             | 86.3            |
|                                                                             | S23_32740 | <i>nuoK</i> | NADP ubiquinone oxidoreductase chain K                              | NADP ubiquinone oxidoreductase chain K (bli4907) of <i>B. japonicum</i> USDA110             | 88.2            |
|                                                                             | S23_32750 | <i>nuoL</i> | NADP ubiquinone oxidoreductase chain L                              | NADP ubiquinone oxidoreductase chain L (bli4906) of <i>B. japonicum</i> USDA110             | 86.7            |
|                                                                             | S23_32760 | <i>nuoM</i> | NADP ubiquinone oxidoreductase chain M                              | NADP ubiquinone oxidoreductase chain M (bli4905) of <i>B. japonicum</i> USDA110             | 85.9            |
|                                                                             | S23_32770 | <i>nuoN</i> | NADP ubiquinone oxidoreductase chain N                              | NADP ubiquinone oxidoreductase chain N (bli4904) of <i>B. japonicum</i> USDA110             | 87.7            |
| Complex II                                                                  | ID        | Gene name   | Product                                                             | Closest gene                                                                                | AA Identity (%) |
| Succinate dehydrogenase                                                     | S23_03230 | <i>sdhB</i> | succinate dehydrogenase iron-sulfur subunit                         | succinate dehydrogenase iron-sulfur protein subunit (blr0515) of <i>B. japonicum</i> USC    | 96.2            |
|                                                                             | S23_03240 | <i>sdhA</i> | succinate dehydrogenase flaboprotein subunit                        | succinate dehydrogenase flaboprotein subunit (blr0514) of <i>B. japonicum</i> USDA110       | 94.6            |
|                                                                             | S23_03250 | <i>sdhD</i> | succinate dehydrogenase hydrophobic membrane anchor protein subunit | succinate dehydrogenase hydrophobic membrane anchor protein subunit (blr0513)               | 85.8            |
|                                                                             | S23_03260 | <i>sdhC</i> | succinate dehydrogenase cytochrome B-556 subunit                    | succinate dehydrogenase hydrophobic membrane anchor protein subunit (blr0512)               | 81.7            |
| Complex III                                                                 | ID        | Gene name   | Product                                                             | Closest gene                                                                                | AA Identity (%) |
| cytochrome <i>bc<sub>1</sub></i> complex                                    | S23_55010 | <i>fbcH</i> | cytochrome b/c1 precursor                                           | cytochrome b/c1 precursor (blr2486) of <i>B. japonicum</i> USDA110                          | 89.5            |
|                                                                             | S23_55020 | <i>fbcF</i> | ubiquinol-cytochrome c reductase iron-sulfur subunit                | rieske iron-sulfur protein (blr2485) of <i>B. japonicum</i> USDA110                         | 96.4            |
| Complex IV                                                                  | ID        | Gene name   | Product                                                             | Closest gene                                                                                | AA Identity (%) |
| heme-copper quinol oxidase                                                  | S23_06500 | <i>cyoD</i> | cytochrome O ubiquinol oxidase subunit IV                           | <i>cyoD</i> -like (blr0152) of <i>B. japonicum</i> USDA110                                  | 88.1            |
|                                                                             | S23_06510 | <i>cyoC</i> | cytochrome O ubiquinol oxidase subunit III                          | <i>cyoC</i> -like (blr0151) of <i>B. japonicum</i> USDA110                                  | 88.0            |
|                                                                             | S23_06520 | <i>cyoB</i> | cytochrome O ubiquinol oxidase subunit I                            | <i>cyoB</i> -like (blr0150) of <i>B. japonicum</i> USDA110                                  | 92.3            |
|                                                                             | S23_06530 | <i>cyoA</i> | cytochrome O ubiquinol oxidase subunit II                           | <i>cyoA</i> -like (blr0149) of <i>B. japonicum</i> USDA110                                  | 91.2            |
| aa <sub>3</sub> -type heme-copper cytochrome c oxidase (Bott et al. 1990)   | S23_07910 | <i>coxA</i> | cytochrome <i>C</i> oxidase subunit I                               | <i>coxA</i> (blr1171) of <i>B. japonicum</i> USDA110                                        | 92.1            |
|                                                                             | S23_07900 | <i>coxB</i> | cytochrome <i>c</i> oxidase subunit II                              | <i>coxB</i> (blr1170) of <i>B. japonicum</i> USDA110                                        | 89.1            |
|                                                                             | S23_07950 | <i>coxC</i> | cytochrome <i>C</i> oxidase subunit III                             | <i>coxC</i> (blr1175) of <i>B. japonicum</i> USDA110                                        | 93.9            |
|                                                                             | S23_07930 | <i>coxF</i> | CoxF protein                                                        | <i>coxF</i> (bsr1173) of <i>B. japonicum</i> USDA110                                        | 89.7            |
| <i>bd</i> -type quinol oxidase (Arslan 2001)                                | S23_13360 |             | putative quinol oxidase subunit I transmembrane protein             | putative quinol oxidase subunit I transmembrane protein (bli0283)                           | 90.0            |
|                                                                             | S23_13370 |             | putative quinol oxidase subunit II transmembrane protein            | putative quinol oxidase subunit II transmembrane protein (bli0282)                          | 77.7            |
| heme-copper cytochrome oxidase (Gottfert et al. 2005)                       | S23_37010 |             | putative cytochrome- <i>c</i> oxidase subunit II                    | hypothetical protein (bli4481) of <i>B. japonicum</i> USDA110                               | 87.2            |
|                                                                             | S23_37020 |             | putative cytochrome- <i>c</i> oxidase subunit I                     | probable cytochrome <i>c</i> oxidase polypeptide I (bli4480) of <i>B. japonicum</i> USDA110 | 88.7            |
|                                                                             | S23_37030 |             | cytochrome C4                                                       | probable cytochrome c4 (bli4479) of <i>B. japonicum</i> USDA110                             | 87.8            |
|                                                                             | S23_36980 |             | putative cytochrome C4                                              | putative cytochrome c4 (bli4483) of <i>B. japonicum</i> USDA110                             | 93.1            |
|                                                                             | S23_36990 |             | putative alcohol dehydrogenase cytochrome C subunit precursor       | putative alcohol dehydrogenase cytochrome C subunit precursor (bli4482)                     | 91.8            |
| cbb <sub>3</sub> -type heme-copper cytochrome oxidase (Preisig et al. 1993) | S23_52360 | <i>fixN</i> | cytochrome- <i>c</i> oxidase                                        | <i>fixN</i> (blr2763) of <i>B. japonicum</i> USDA110                                        | 90.0            |
|                                                                             | S23_52350 | <i>fixO</i> | cytochrome- <i>c</i> oxidase                                        | <i>fixO</i> (blr2764) of <i>B. japonicum</i> USDA110                                        | 91.0            |
|                                                                             | S23_52340 | <i>fixQ</i> | cbb3 oxidase subunit IV                                             | <i>fixQ</i> (blr2765) of <i>B. japonicum</i> USDA110                                        | 95.0            |
|                                                                             | S23_52330 | <i>fixP</i> | cytochrome- <i>c</i> oxidase FixP chain                             | <i>fixP</i> (blr2766) of <i>B. japonicum</i> USDA110                                        | 91.4            |
| bb <sub>3</sub> -type heme-copper quinol oxidase (Surpin et al. 1996)       | S23_52770 | <i>coxZ</i> | cytochrome o ubiquinol oxidase subunit IV                           | <i>coxZ</i> (blr2717) of <i>B. japonicum</i> USDA110                                        | 77.5            |
|                                                                             | S23_52780 | <i>coxY</i> | cytochrome o ubiquinol oxidase subunit III                          | <i>coxY</i> (blr2716) of <i>B. japonicum</i> USDA110                                        | 89.7            |
|                                                                             | S23_52790 | <i>coxX</i> | putative cytochrome o ubiquinol oxidase chain I protein             | <i>coxX</i> (blr2715) of <i>B. japonicum</i> USDA110                                        | 89.8            |
|                                                                             | S23_52800 | <i>coxW</i> | cytochrome o ubiquinol oxidase subunit II                           | <i>coxW</i> (blr2714) of <i>B. japonicum</i> USDA110                                        | 90.6            |
| Complex V                                                                   | ID        | Gene name   | Product                                                             | Closest gene                                                                                | AA Identity (%) |
| FoF1 ATP synthase                                                           | S23_04000 | <i>atpH</i> | ATP synthase subunit delta                                          | ATP synthase delta chain (bli0443) of <i>B. japonicum</i> USDA110                           | 89.2            |
|                                                                             | S23_04010 | <i>atpA</i> | ATP synthase subunit alpha                                          | ATP synthase alpha chain (bli0442) of <i>B. japonicum</i> USDA110                           | 91.7            |
|                                                                             | S23_04020 | <i>atpG</i> | ATP synthase gamma chain                                            | ATP synthase gamma chain (bli0441) of <i>B. japonicum</i> USDA110                           | 85.6            |
|                                                                             | S23_04030 |             | ATP synthase beta chain                                             | ATP synthase beta chain (bli0440) of <i>B. japonicum</i> USDA110                            | 93.3            |
|                                                                             | S23_04050 | <i>atpC</i> | ATP synthase epsilon chain                                          | ATP synthase epsilon chain (bli0439) of <i>B. japonicum</i> USDA110                         | 88.1            |
|                                                                             | S23_08050 |             | FoF1 ATP synthase subunit b                                         | FoF1 ATP synthase B chain (bli1185) of <i>B. japonicum</i> USDA110                          | 89.4            |
|                                                                             | S23_08060 |             | ATP synthase subunit b/b'                                           | FoF1 ATP synthase B' chain (bli1186) of <i>B. japonicum</i> USDA110                         | 88.3            |
|                                                                             | S23_08070 | <i>atpC</i> | FoF1 ATP synthase subunit C                                         | FoF1 ATP synthase C chain (bli1187) of <i>B. japonicum</i> USDA110                          | 90.8            |
|                                                                             | S23_08080 |             | ATP synthase subunit a                                              | FoF1 ATP synthase A chain (bli1188) of <i>B. japonicum</i> USDA110                          | 89.2            |
|                                                                             | S23_08090 |             | ATP synthase subunit A'                                             | FoF1 ATP synthase subunit I (bsl1189) of <i>B. japonicum</i> USDA110                        | 95.4            |

Table S6. Genes for ABC (ATP-binding cassette) proteins and their interacting partners in the *Bradyrhizobium* sp. S23321 genome.

|   | Family* | Function     | Component                                                                           | Gene name | Missed component | Predicted transport substrate | Orthologues** in                                                          |                    |                                                       |  |
|---|---------|--------------|-------------------------------------------------------------------------------------|-----------|------------------|-------------------------------|---------------------------------------------------------------------------|--------------------|-------------------------------------------------------|--|
|   |         |              |                                                                                     |           |                  |                               | <i>Bradyrhizobium japonicum</i> USDA110                                   | other Rhizobiaceae | other bacteria                                        |  |
| 1 | MOS     | importer     | BP(S23_00190)                                                                       |           | IM, ABC          | ribose                        | -                                                                         | mlr5740            | <i>Mesorhizobium loti</i> MAFF303099                  |  |
| 2 |         | excinuclease | subunit C(S23_00980)                                                                |           | subunit A, B     | -                             | -                                                                         | RL0110             | <i>Rhizobium leguminosarum</i> bv. <i>visiae</i> 3841 |  |
| 3 | OSP     | importer     | BP(S23_01020)<br>IM(S23_01030)<br>IM(S23_01040)<br>ABC(S23_01050)                   |           |                  | glycerol-3 phosphate          | BP(bll0733)<br>IM(bll0732)<br>IM(bll0731)<br>ABC(bll0730)                 |                    |                                                       |  |
| 4 | o228    | exporter     | OMR(S23_03790)<br>IM(S23_03800)<br>ABC(S23_03810)                                   |           |                  |                               | IM(bll0462)<br>IM(bll0461)<br>ABC(bll0460)                                |                    |                                                       |  |
| 5 | OTCN    | importer     | BP(S23_04540)<br>IM(S23_04560)<br>ABC(S23_04550)                                    |           |                  |                               | BP(bll0381)<br>IM(bll0379)<br>ABC(bll0380)                                |                    |                                                       |  |
| 6 | HAA     | importer     | BP(S23_06050)<br>IM(S23_06040)<br>IM(S23_06060)<br>ABC(S23_06070)<br>ABC(S23_06080) |           |                  |                               | BP(bll0196)<br>IM(bll0197)<br>IM(bll0195)<br>ABC(bll0194)<br>ABC(bll0193) |                    |                                                       |  |
| 7 | OTCN    | importer     | BP(S23_06990)<br>IM(S23_07010)<br>ABC(S23_0700)                                     |           |                  |                               | BP(bll0113)<br>IM(bll0111)<br>ABC(bll0112)                                |                    |                                                       |  |



|    |      |          |                                                                                                      |                          |    |            |                                                                                    |  |  |  |
|----|------|----------|------------------------------------------------------------------------------------------------------|--------------------------|----|------------|------------------------------------------------------------------------------------|--|--|--|
| 8  | OTCN | importer | BP(S23_07240)<br>IM(S23_07260)<br>ABC(S23_07250)                                                     |                          |    |            | BP(bl10091)<br>IM(bl10089)<br>ABC(bl10090)                                         |  |  |  |
| 9  | MOI  | importer | BP(S23_07340)<br>IM(S23_07350)<br>ABC(S23_07360)                                                     | <i>modA</i><br><i>BC</i> |    | molybdenum | BP(bl18162)<br>IM(bl18161)<br>ABC(bl18160)                                         |  |  |  |
| 10 | OPN  | importer | BP(S23_08330)<br>IM(S23_08310)<br>IM(S23_08320)<br>ABC(S23_08300)                                    |                          |    |            | BP(bl1212)<br>IM(bl1210)<br>IM(bl1211)<br>ABC(bl1209)                              |  |  |  |
| 11 | DRI  | unknown  | ABC(S23_08510)                                                                                       |                          | IM |            | ABC(bl7933)                                                                        |  |  |  |
| 12 | HAA  | importer | IM(S23_08520)<br>IM(S23_08530)<br>ABC(S23_08540)<br>ABC(S23_08550)                                   |                          | BP |            | IM(bl7932)<br>IM(bl7931)<br>ABC(bl7930)<br>ABC(bl7929)                             |  |  |  |
| 13 | OPN  | importer | BP(S23_08630)<br>BP(S23_08640)<br>IM(S23_08650)<br>IM(S23_08660)<br>ABC(S23_08670)<br>ABC(S23_08700) |                          |    |            | BP(bl7922)<br>BP(bl7921)<br>IM(bl7920)<br>IM(bl7919)<br>ABC(bl7918)<br>ABC(bl7916) |  |  |  |
| 14 | DPL  | exporter | IM+ABC(S23_08720)                                                                                    |                          |    |            | IM+ABC(bl7914)                                                                     |  |  |  |
| 15 | DRI  | exporter | IM(S23_09110)<br>IM+ABC+ABC(S23_09120)                                                               |                          |    |            | IM(bl7874)<br>IM+ABC+ABC(bl7873)                                                   |  |  |  |
| 16 | MOS  | importer | BP(S23_09170)<br>IM(S23_09160)<br>IM(S23_09180)<br>ABC(S23_09140)                                    |                          |    |            | BP(bl7868)<br>IM(bl7869)<br>IM(bl7867)<br>ABC(bl7871)                              |  |  |  |

|    |     |          |                                                                                      |  |    |         |                                                                      |   |   |                                                      |
|----|-----|----------|--------------------------------------------------------------------------------------|--|----|---------|----------------------------------------------------------------------|---|---|------------------------------------------------------|
| 17 | HAA | importer | IM(S23_09550)<br>IM+ABC(S23_09540)<br>ABC(S23_09530)                                 |  | BP |         | IM(bl7832)<br>IM+ABC(bl7833)<br>ABC(bl7834)                          |   |   |                                                      |
| 18 | HAA | importer | BP(S23_09610)<br>IM(S23_09620)<br>IM(S23_09630)<br>ABC(S23_09640)<br>ABC(S23_09650)  |  |    |         | BP(bl7827)<br>IM(bl7826)<br>IM(bl7825)<br>ABC(bl7824)<br>ABC(bl7823) |   |   |                                                      |
| 19 | OPN | importer | BP1(S23_09860)<br>BP2(S23_09870)<br>IM(S23_09880)<br>IM(S23_09890)<br>ABC(S23_09900) |  |    |         | BP1(bl1424)<br>BP2(-)<br>IM(bl1426)<br>IM(bl1427)<br>ABC(bl1428)     |   |   |                                                      |
| 20 | HAA | importer | BP(S23_10120)<br>IM(S23_10130)<br>IM(S23_10140)<br>ABC(S23_10150)<br>ABC(S23_10160)  |  |    |         | BP(bl1448)<br>IM(bl1449)<br>IM(bl1450)<br>ABC(bl1451)<br>ABC(bl1452) |   |   |                                                      |
| 21 | MOI | importer | BP(S23_10460)<br>IM(S23_10470)<br>IM(S23_10480)<br>ABC(S23_10490)                    |  |    | sulfate | BP(bl1482)<br>IM(bl1483)<br>IM(bl1484)<br>ABC(bl1485)                |   |   |                                                      |
| 22 | HAA | importer | BP(S23_10540)<br>IM(S23_10560)<br>IM+ABC(S23_10550)<br>ABC(S23_10570)                |  |    |         | -                                                                    | - | - | <i>Rhodopseudo<br/>monas<br/>palustris</i><br>BisB18 |
| 23 | DPL | exporter | IM+ABC(S23_10780)                                                                    |  |    |         | IM+ABC(bl1508)                                                       |   |   |                                                      |

|    |      |          |                                                                    |                          |     |                        |                                                            |  |  |  |
|----|------|----------|--------------------------------------------------------------------|--------------------------|-----|------------------------|------------------------------------------------------------|--|--|--|
| 24 | PAO  | importer | BP1(S23_11240)<br>BP2(S23_11270)<br>IM(S23_11250)<br>IM(S23_11260) |                          | ABC |                        | BP1(bl17206)<br>BP2(bl17203)<br>IM(bl17204)<br>IM(bl17205) |  |  |  |
| 25 | MOI  | importer | BP(S23_11330)<br>IM(S23_11350)<br>IM(S23_11360)<br>ABC(S23_11340)  |                          |     |                        | BP(bl17197)<br>IM(bl17194)<br>IM(bl17195)<br>ABC(bl17196)  |  |  |  |
| 26 | MOI  | importer | IM(S23_12230)<br>IM(S23_12240)<br>ABC(S23_12220)                   |                          | BP  |                        | IM(bl17103)<br>IM(bl17104)<br>ABC(bl17105)                 |  |  |  |
| 27 | OSP  | importer | BP(S23_12270)<br>IM(S23_12250)<br>IM(S23_12260)                    |                          | ABC |                        | BP(bl17099)<br>IM(bl17101)<br>IM(bl17100)                  |  |  |  |
| 28 | ISVH | importer | BP(S23_11430)<br>IM(S23_11420)<br>ABC(S23_11410)                   | <i>hmuT</i><br><i>UV</i> |     | hemin                  | BP(bl17077)<br>IM(bl17078)<br>ABC(bl17079)                 |  |  |  |
| 29 | OSP  | importer | BP(S23_12570)<br>IM(S23_12550)<br>IM(S23_12560)                    |                          | ABC |                        | BP(bl17064)<br>IM(bl17066)<br>IM(bl17065)                  |  |  |  |
| 30 | OTCN | importer | BP(S23_12920)<br>IM(S23_12950)<br>ABC(S23_12960)                   |                          |     | aliphatic<br>sulfonate | BP(bl17011)<br>IM(bl17009)<br>ABC(bl17008)                 |  |  |  |
| 31 | HAA  | importer | BP(S23_13730)<br>IM(S23_13740)<br>ABC(S23_13750)<br>ABC(S23_13760) |                          |     |                        | BP(bl16899)<br>IM(bl16898)<br>ABC(bl16897)<br>ABC(bl16896) |  |  |  |

|    |     |                     |                                                                   |  |            |  |                                                           |                                               |                                    |                                                        |
|----|-----|---------------------|-------------------------------------------------------------------|--|------------|--|-----------------------------------------------------------|-----------------------------------------------|------------------------------------|--------------------------------------------------------|
| 32 | MOI | importer            | BP(S23_14470)<br>IM(S23_14480)<br>IM(S23_14490)<br>ABC(S23_14440) |  |            |  | BP(bll6825)<br>IM(bll6824)<br>IM(bll6823)<br>ABC(bll6828) |                                               |                                    |                                                        |
| 33 | PAO | importer            | IM(S23_14580)<br>ABC(S23_14570)                                   |  | BP         |  | -                                                         | -                                             | -                                  | <i>Rhodopseudo<br/>monas<br/>palustris</i><br>BisB18   |
| 34 | OSP | importer            | BP(S23_14740)<br>IM(S23_14720)<br>IM(S23_14730)                   |  | ABC        |  | -                                                         | -                                             | -                                  | IMs<br>( <i>Oceanicola<br/>granulosus</i><br>HTCC2516) |
| 35 | HAA | importer            | BP(S23_14800)                                                     |  | IM,<br>ABC |  | BP(bl6804)                                                |                                               |                                    |                                                        |
| 36 | MOI | importer            | BP(S23_14820)<br>IM(S23_14830)<br>IM(S23_14840)<br>ABC(S23_14850) |  |            |  | -                                                         | BP(1905)<br>IM(1906)<br>IM(1907)<br>ABC(1908) | <i>Bradyrhizobium</i><br>sp. BTAi1 |                                                        |
| 37 | OPN | importer            | BP(S23_15960)<br>IM(S23_15970)<br>IM(S23_15980)                   |  | ABC        |  | BP(bll6714)<br>IM(bll6713)<br>IM(bll6712)                 |                                               |                                    |                                                        |
| 38 | ART | cellular<br>process | ABC+ABC(S23_1<br>6210)                                            |  |            |  | ABC+ABC(bll6685)                                          |                                               |                                    |                                                        |
| 39 | HAA | importer            | BP(S23_16620)                                                     |  | IM,<br>ABC |  | BP(bl6648)                                                |                                               |                                    |                                                        |
| 40 | MOI | importer            | BP(S23_16650)<br>IM(S23_16630)<br>IM(S23_16640)<br>ABC(S23_16660) |  |            |  | BP(bl6645)<br>IM(bl6647)<br>IM(bl6646)<br>ABC(bl6644)     |                                               |                                    |                                                        |
| 41 | DPL | exporter            | IM+ABC(S23_169<br>80)                                             |  |            |  | IM+ABC(bll6620)                                           |                                               |                                    |                                                        |

|    |      |                                           |                                                                                                      |             |                 |           |                                                                                          |   |   |   |
|----|------|-------------------------------------------|------------------------------------------------------------------------------------------------------|-------------|-----------------|-----------|------------------------------------------------------------------------------------------|---|---|---|
| 42 | DRA  | exporter                                  | IM(S23_17420)<br>ABC(S23_17430)                                                                      | <i>nodJ</i> |                 |           | IM(blr6578)<br>ABC(blr6579)                                                              |   |   |   |
| 43 | OTCN | importer                                  | BP(S23_17880)<br>IM(S23_17860)<br>ABC(S23_17870)                                                     |             |                 | sulfonate | -                                                                                        | - | - | - |
| 44 | HAA  | importer                                  | BP(S23_18040)<br>IM(S23_18050)<br>IM(S23_18060)<br>ABC(S23_18070)<br>ABC(S23_18080)                  |             |                 |           | -                                                                                        | - | - | - |
| 45 | OTCN | importer                                  | BP+IM(S23_18440)<br>)<br>IM(S23_18470)<br>ABC(S23_18450)<br>ABC(S23_18460)                           |             |                 |           | BP+IM(blr6490)<br>IM(bll6487)<br>ABC(blr6489)<br>ABC(bll6488)                            |   |   |   |
| 46 | OTCN | importer                                  | BP(S23_18530)<br>BP(S23_18550)<br>IM(S23_18580)<br>IM(S23_18590)<br>ABC(S23_18560)<br>ABC(S23_18570) |             |                 |           | BP(bll6481)<br>BP(bll6479)<br>IM(bll6475)<br>IM(bll6476)<br>ABC(bll6477)<br>ABC(bll6478) |   |   |   |
| 47 | HAA  | importer                                  | ABC(S23_18840)                                                                                       |             | BP, IM          |           | ABC(blr6447)                                                                             |   |   |   |
| 48 | UVR  | cellular<br>process<br>(excinucleas<br>e) | subunit<br>A(S23_18850)                                                                              | <i>uvrA</i> | subunit<br>B, C |           | subunit A(blr8051)                                                                       |   |   |   |
| 49 | HAA  | importer                                  | BP(S23_18860)<br>IM(S23_18880)<br>IM(S23_18890)<br>ABC(S23_18870)                                    |             |                 |           | BP(blr6446)<br>IM(blr6443)<br>IM(blr6444)<br>ABC(blr6445)                                |   |   |   |

|    |      |          |                                                                                        |  |            |           |                                                                      |   |   |                                    |
|----|------|----------|----------------------------------------------------------------------------------------|--|------------|-----------|----------------------------------------------------------------------|---|---|------------------------------------|
| 50 | HAA  | importer | BP(S23_19900)<br>BP(S23_19910)<br>IM(S23_19940)<br>IM+ABC(S23_19930)<br>ABC(S23_19920) |  |            |           | -                                                                    | - | - | <i>Bordetella petrii</i> DSM 12804 |
| 51 | OTCN | importer | BP(S23_20010)<br>IM(S23_20020)<br>IM(S23_20040)<br>ABC(S23_20030)                      |  |            |           | -                                                                    | - | - | -                                  |
| 52 | OTCN | importer | BP(S23_20430)<br>IM(S23_20420)<br>ABC(S23_20410)                                       |  |            |           | BP(bl6246)<br>IM(bl6247)<br>ABC(bl6248)                              |   |   |                                    |
| 53 | HAA  | importer | BP(S23_20530)<br>IM(S23_20540)<br>IM(S23_20550)<br>ABC(S23_20560)<br>ABC(S23_20570)    |  |            |           | BP(bl6236)<br>IM(bl6235)<br>IM(bl6234)<br>ABC(bl6233)<br>ABC(bl6232) |   |   |                                    |
| 54 | MOI  | importer | BP(S23_20630)<br>IM(S23_20640)                                                         |  | ABC        | tungstate | BP(bl6227)<br>IM(bl6226)                                             |   |   |                                    |
| 55 | PAO  | importer | BP(S23_20860)                                                                          |  | IM,<br>ABC |           | BP(bl6209)                                                           |   |   |                                    |
| 56 | OTCN | importer | BP(S23_20950)<br>IM(S23_20940)<br>ABC(S23_20930)                                       |  |            |           | BP(bl6199)<br>IM(bl6200)<br>ABC(bl6201)                              |   |   |                                    |
| 57 | DRI  | exporter | IM(S23_21030)<br>ABC(S23_21040)                                                        |  |            |           | IM(bl6191)<br>ABC(bl6190)                                            |   |   |                                    |
| 58 | MOS  | importer | BP(S23_21360)<br>IM(S23_21370)<br>IM(S23_21380)<br>ABC(S23_21390)                      |  |            |           | BP(bl6158)<br>IM(bl6156)<br>IM(bl6157)<br>ABC(bl6155)                |   |   |                                    |

|    |      |          |                                                                                      |                          |  |         |                                                                       |  |  |  |
|----|------|----------|--------------------------------------------------------------------------------------|--------------------------|--|---------|-----------------------------------------------------------------------|--|--|--|
| 59 | MOS  | importer | BP(S23_21460)<br>IM(S23_21440)<br>IM(S23_21450)<br>ABC(S23_21420)                    |                          |  |         | BP(bl6148)<br>IM(bl6149)<br>IM(bl6150)<br>ABC(bl6152)                 |  |  |  |
| 60 | OTCN | importer | BP(S23_21820)<br>IM(S23_21850)<br>IM(S23_21860)<br>ABC(S23_21840)                    |                          |  |         | BP(bl6093)<br>IM(bl6089)<br>IM(bl6090)<br>ABC(bl6091)                 |  |  |  |
| 61 | MKL  | importer | BP(S23_22130)<br>IM(S23_22110)<br>ABC(S23_22120)                                     |                          |  |         | BP(bl6065)<br>IM(bl6064)<br>ABC(bl6063)                               |  |  |  |
| 62 | HAA  | importer | BP1(S23_22770)<br>BP2(S23_22780)<br>IM(S23_22790)<br>IM(S23_22800)<br>ABC(S23_22830) |                          |  |         | BP1(bl5967)<br>BP2(bl5966)<br>IM(bl5964)<br>IM(bl5965)<br>ABC(bl5962) |  |  |  |
| 63 | HAA  | importer | BP(S23_22910)<br>IM(S23_22920)<br>IM(S23_22930)<br>ABC(S23_22940)<br>ABC(S23_22950)  |                          |  |         | BP(bl5953)<br>IM(bl5951)<br>IM(bl5952)<br>ABC(bl5949)<br>ABC(bl5950)  |  |  |  |
| 64 | DPL  | exporter | IM+ABC(S23_2310)                                                                     |                          |  |         | IM+ABC(bl5932)                                                        |  |  |  |
| 65 | MKL  | importer | SS(S23_23650)<br>IM(S23_23630)<br>ABC(S23_23640)                                     |                          |  |         | SS(bl5892)<br>IM(bl5894)<br>ABC(bl5893)                               |  |  |  |
| 66 | OTCN | importer | BP(S23_25160)<br>IM(S23_25170)<br>ABC(S23_25180)                                     | <i>nrtAB</i><br><i>C</i> |  | nitrate | BP(bl5734)<br>IM(bl5733)<br>ABC(bl5732)                               |  |  |  |

|    |      |          |                                                                                      |  |            |         |                                                                       |   |   |                                                      |
|----|------|----------|--------------------------------------------------------------------------------------|--|------------|---------|-----------------------------------------------------------------------|---|---|------------------------------------------------------|
| 67 | HAA  | importer | BP(S23_25540)<br>IM(S23_25520)<br>IM(S23_25530)<br>ABC(S23_25500)<br>ABC(S23_25510)  |  |            |         | -                                                                     | - | - | <i>Rhodopseudo<br/>monas<br/>palustris</i><br>BisB18 |
| 68 | HAA  | importer | BP(S23_25780)<br>IM(S23_25810)<br>IM(S23_25820)<br>ABC(S23_25790)<br>ABC(S23_25800)  |  |            |         | BP(bl5675)<br>IM(bl5671)<br>IM(bl5672)<br>ABC(bl5673)<br>ABC(bl5674)  |   |   |                                                      |
| 69 | DRI  | exporter | ABC(S23_26050)<br>IM(S23_26060)                                                      |  |            | nitrate | ABC(bl5649)<br>IM(bl5648)                                             |   |   |                                                      |
| 70 | OPN  | importer | BP1(S23_26540)<br>BP2(S23_26550)<br>IM(S23_26500)<br>IM(S23_26510)<br>ABC(S23_26490) |  |            |         | BP1(bl5596)<br>BP1(bl5596)<br>IM(bl5598)<br>IM(bl5599)<br>ABC(bl5600) |   |   |                                                      |
| 71 | MOI  | importer | BP(S23_26830)<br>IM(S23_26810)<br>IM(S23_26820)<br>ABC(S23_26840)                    |  |            |         | BP(bl5574)<br>IM(bl5575)<br>IM(bl5576)<br>ABC(bl5573)                 |   |   |                                                      |
| 72 | DPL  | exporter | IM+ABC(S23_287<br>30)                                                                |  |            |         | IM+ABC(bl5407)                                                        |   |   |                                                      |
| 73 | o228 | exporter | IM(S23_29750)<br>ABC(S23_29760)                                                      |  |            |         | IM(bl5304)<br>ABC(bl5303)                                             |   |   |                                                      |
| 74 | HAA  | importer | BP(S23_29950)                                                                        |  | IM,<br>ABC |         | BP(bl5286)                                                            |   |   |                                                      |
| 75 | HAA  | importer | BP(S23_29980)                                                                        |  | IM,<br>ABC |         | -                                                                     | - | - | -                                                    |
| 76 | OPN  | importer | BP(S23_31560)                                                                        |  | IM,        |         | BP(bl5056)                                                            |   |   |                                                      |



|    |      |                  |                                                                                     |             |            |            |                                                                      |                                   |                                    |   |
|----|------|------------------|-------------------------------------------------------------------------------------|-------------|------------|------------|----------------------------------------------------------------------|-----------------------------------|------------------------------------|---|
|    |      |                  |                                                                                     |             | ABC        |            |                                                                      |                                   |                                    |   |
| 77 | OTCN | importer         | BP(S23_32910)<br>IM(S23_32870)<br>IM(S23_32880)<br>ABC(S23_32890)                   |             |            |            | -                                                                    | -                                 | -                                  | - |
| 78 | MOS  | importer         | BP(S23_32970)<br>IM(S23_32950)<br>ABC+ABC(S23_32960)                                |             |            |            | BP(bl4884)<br>IM(bl4886)<br>ABC+ABC(bl4885)                          |                                   |                                    |   |
| 79 | MOI  | importer         | BP(S23_33750)                                                                       |             | IM,<br>ABC |            | BP(bl4797)                                                           |                                   |                                    |   |
| 80 | UVR  | cellular process | ABC+ABC subunitA (S23_34520)                                                        | <i>uvrA</i> |            |            | ABC+ABC(bl4702)                                                      |                                   |                                    |   |
| 81 | OPN  | importer         | BP(S23_35210)                                                                       |             | IM,<br>ABC |            | BP(bl4590)                                                           |                                   |                                    |   |
| 82 | OSP  | importer         | BP(S23_35580)<br>IM(S23_35560)<br>IM(S23_35570)<br>ABC(S23_35550)                   |             |            |            | BP(bl4553)<br>IM(bl4554)<br>IM(bl4556)<br>ABC(bl4557)                |                                   |                                    |   |
| 83 | OPN  | importer         | BP(S23_35670)<br>IM(S23_35700)<br>IM(S23_35710)<br>ABC(S23_35680)<br>ABC(S23_35690) |             |            |            | BP(bl4544)<br>IM(bl4540)<br>IM(bl4541)<br>ABC(bl4542)<br>ABC(bl4543) |                                   |                                    |   |
| 84 | FAE  | exporter         | IM+ABC(S23_36480)                                                                   |             |            |            | IM+ABC(bl4660)                                                       |                                   |                                    |   |
| 85 | DLM  | importer         | BP(S23_36720)<br>IM(S23_36730)<br>ABC(S23_36740)                                    |             |            | methionine | BP(-)<br>IM(bl4502)<br>ABC(bl4501)                                   | BP(3285)<br>IM(3282)<br>ABC(3281) | <i>Bradyrhizobium</i><br>sp. BTAi1 |   |

|    |      |                  |                                                                   |                            |            |                  |                                                       |   |   |                                               |
|----|------|------------------|-------------------------------------------------------------------|----------------------------|------------|------------------|-------------------------------------------------------|---|---|-----------------------------------------------|
| 86 | ISVH | importer         | BP(S23_36830)<br>IM(S23_36840)<br>ABC(S23_36850)                  |                            |            | iron siderophore | -                                                     | - | - | <i>Rhodopseudo monas palustris</i><br>TIE-1   |
| 87 | PAO  | importer         | BP(S23_37210)<br>ABC(S23_37200)                                   |                            | IM         |                  | BP(bl4464)<br>ABC(bl4463)                             |   |   |                                               |
| 88 | PAO  | importer         | BP(S23_37370)<br>IM(S23_37350)<br>IM(S23_37360)<br>ABC(S23_37340) | <i>aapP</i><br>(S23_37340) |            | amino acid       | BP(bl4446)<br>IM(bl4447)<br>IM(bl4448)<br>ABC(bl4449) |   |   |                                               |
| 89 | CLS  | exporter         | ABC(S23_39690)                                                    |                            | IM         |                  | ABC(bl4315)                                           |   |   |                                               |
| 90 | HAA  | importer         | BP(S23_39720)                                                     |                            | IM,<br>ABC |                  | BP(bl4312)                                            |   |   |                                               |
| 91 | OTCN | importer         | IM(S23_40560)                                                     |                            | BP,<br>ABC |                  | IM(bl4208)                                            |   |   |                                               |
| 92 | OTCN | importer         | ABC(S23_40600)                                                    |                            | BP, IM     |                  | ABC(bl4204)                                           |   |   |                                               |
| 93 | ART  | cellular process | ABC+ABC(S23_40760)                                                |                            |            |                  | ABC+ABC)bl4184                                        |   |   |                                               |
| 94 | HAA  | importer         | BP(S23_40810)                                                     |                            | IM,<br>ABC |                  | -                                                     | - | - | <i>Methylobacter ium nodulans</i><br>ORS 2060 |
| 95 | MOI  | importer         | BP(S23_40850)                                                     |                            | IM,<br>ABC |                  | BP(bl4171)                                            |   |   |                                               |
| 96 | OSP  | importer         | BP(S23_41250)<br>IM(S23_41230)<br>IM(S23_41240)                   |                            | ABC        |                  | BP(bl4139)<br>IM(bl4140)<br>IM(bl4138)                |   |   |                                               |
| 97 | PAO  | importer         | BP(S23_41980)<br>IM(S23_41950)<br>IM(S23_41960)<br>ABC(S23_41970) |                            |            |                  | -                                                     | - | - | <i>Methylobacter ium</i> sp. 4-46             |

|     |      |          |                                                                                     |  |        |  |                                                                           |   |   |                                                  |
|-----|------|----------|-------------------------------------------------------------------------------------|--|--------|--|---------------------------------------------------------------------------|---|---|--------------------------------------------------|
| 98  | HAA  | importer | BP(S23_42210)<br>IM(S23_42190)<br>IM(S23_42200)<br>ABC(S23_42220)<br>ABC(S23_42230) |  |        |  | BP(blr4039)<br>IM(blr4040)<br>IM(blr4041)<br>ABC(blr4037)<br>ABC(blr4038) |   |   |                                                  |
| 99  | OSP  | importer | BP(S23_43160)<br>IM1(S23_43140)<br>IM2(S23_43150)<br>ABC(S23_43170)                 |  |        |  | ABC(blr3917)                                                              | - | - | BP and IM1<br>( <i>Polaromonas</i><br>sp. JS666) |
| 100 | HAA  | importer | BP(S23_43430)<br>IM(S23_43410)<br>IM(S23_43420)<br>ABC(S23_43390)<br>ABC(S23_43400) |  |        |  | -                                                                         | - | - | -                                                |
| 101 | OTCN | importer | BP(S23_43910)<br>IM(S23_43920)<br>ABC(S23_43930)                                    |  |        |  | -                                                                         | - | - | <i>Methylobacterium</i> sp. 4-46                 |
| 102 | HAA  | importer | BP(S23_44170)<br>IM(S23_44160)<br>ABC(S23_44140)<br>ABC(S23_44150)                  |  |        |  | BP(blr3825)<br>IM(blr3826)<br>ABC(blr3827)<br>ABC(blr3828)                |   |   |                                                  |
| 103 | PHN  | importer | ABC(S23_44270)                                                                      |  | BP, IM |  | -                                                                         | - | - | -                                                |
| 104 | DPL  | exporter | IM+ABC(S23_44530)                                                                   |  |        |  | IM+ABC(blr3795)                                                           |   |   |                                                  |
| 105 | HAA  | importer | IM(S23_45180)<br>IM(S23_45190)<br>ABC(S23_45200)<br>ABC(S23_45210)                  |  | BP     |  | IM(bll3384)<br>IM(bll3385)<br>ABC(bll3382)<br>ABC(bll3383)                |   |   |                                                  |
| 106 | HAA  | importer | IM+ABC(S23_45370)                                                                   |  | BP     |  | -                                                                         | - | - | <i>Bordetella avium</i> 197N                     |

|     |     |          |                                                                                                        |                          |            |              |                                                           |                                                                          |                                    |   |
|-----|-----|----------|--------------------------------------------------------------------------------------------------------|--------------------------|------------|--------------|-----------------------------------------------------------|--------------------------------------------------------------------------|------------------------------------|---|
|     |     |          | ABC(S23_45360)                                                                                         |                          |            |              |                                                           |                                                                          |                                    |   |
| 107 | OSP | importer | BP(S23_45460)<br>IM(S23_45440)<br>IM(S23_45450)<br>ABC(S23_45420)                                      |                          |            |              | BP(bl16356)<br>IM(bl16354)<br>IM(bl16355)<br>ABC(bl16352) |                                                                          |                                    |   |
| 108 | HAA | importer | BP1(S23_45610)<br>BP2(S23_45620)<br>IM(S23_45630)<br>IM(S23_45640)<br>ABC(S23_45650)<br>ABC(S23_45660) |                          |            |              | -                                                         | BP1(4448)<br>BP2(4449)<br>IM(4450)<br>IM(4451)<br>ABC(4452)<br>ABC(4453) | <i>Bradyrhizobium</i><br>sp. BTai1 |   |
| 109 | OPN | importer | BP(S23_45830)<br>IM(S23_45810)<br>IM(S23_45820)<br>ABC+ABC(S23_45800)                                  |                          |            |              | -                                                         | -                                                                        | -                                  | - |
| 110 | MOI | importer | BP(S23_45870)<br>IM(S23_45880)<br>ABC(S23_45890)                                                       | <i>modA</i><br><i>BC</i> |            | molybdenum   | BP(bl6951)<br>IM(bl6952)<br>ABC(bl6953)                   |                                                                          |                                    |   |
| 111 | DLM | importer | BP(S23_46600)                                                                                          |                          | IM,<br>ABC | D-methionine | -                                                         | BP(3291)                                                                 | <i>Bradyrhizobium</i><br>sp. BTai1 |   |
| 112 | HAA | importer | BP(S23_46740)<br>IM(S23_46720)<br>IM(S23_46730)<br>ABC(S23_46700)<br>ABC(S23_46710)                    |                          |            |              | -                                                         | BP(3206)<br>IM(3203)<br>IM(3204)<br>ABC(3205)<br>ABC(3206)               | <i>Bradyrhizobium</i><br>sp. BTai1 |   |

|     |      |          |                                                                                     |  |  |  |                                                                      |  |  |  |
|-----|------|----------|-------------------------------------------------------------------------------------|--|--|--|----------------------------------------------------------------------|--|--|--|
| 113 | MOS  | importer | BP(S23_46870)<br>IM(S23_46850)<br>IM(S23_46860)<br>ABC+ABC(S23_46840)               |  |  |  | BP(bl12674)<br>IM(bl12675)<br>IM(bl12676)<br>ABC+ABC(bl12677)        |  |  |  |
| 114 | OPN  | importer | BP(S23_46930)<br>IM(S23_46910)<br>IM(S23_46920)<br>ABC(S23_46890)<br>ABC(S23_46900) |  |  |  | BP(bl3341)<br>IM(bl3342)<br>IM(bl3343)<br>ABC(bl3344)<br>ABC(bl3345) |  |  |  |
| 115 | OPN  | importer | BP(S23_46970)<br>IM(S23_46950)<br>IM(S23_46960)<br>ABC+ABC(S23_46940)               |  |  |  | BP(bl3337)<br>IM(bl3338)<br>IM(bl3339)<br>ABC+ABC(bl3340)            |  |  |  |
| 116 | OTCN | importer | BP(S23_46140)<br>IM(S23_46130)<br>ABC(S23_46120)                                    |  |  |  | BP(bl3291)<br>IM(bl3292)<br>ABC(bl3293)                              |  |  |  |
| 117 | MOI  | importer | BP(S23_46190)<br>IM(S23_46200)<br>IM(S23_46210)<br>ABC(S23_46180)                   |  |  |  | BP(bl3284)<br>IM(bl3285)<br>IM(bl3286)<br>ABC(bl3287)                |  |  |  |
| 118 | OPN  | importer | BP(S23_47650)<br>IM(S23_47680)<br>IM(S23_47690)<br>ABC(S23_47660)<br>ABC(S23_47670) |  |  |  | BP(bl3234)<br>IM(bl3230)<br>IM(bl3231)<br>ABC(bl3232)<br>ABC(bl3233) |  |  |  |
| 119 | OSP  | importer | BP(S23_47770)<br>IM(S23_47750)<br>IM(S23_47760)<br>ABC(S23_47740)                   |  |  |  | BP(bl3221)<br>IM(bl3222)<br>IM(bl3223)<br>ABC(bl3224)                |  |  |  |

|     |      |          |                                                                                      |                            |            |                    |                                                                       |   |   |                                   |
|-----|------|----------|--------------------------------------------------------------------------------------|----------------------------|------------|--------------------|-----------------------------------------------------------------------|---|---|-----------------------------------|
| 120 | MOS  | importer | BP(S23_47890)<br>IM(S23_47870)<br>ABC(S23_47880)                                     | <i>chvE</i><br>(S23_47890) |            | multiple<br>sugars | BP(bl3208)<br>IM(bl3210)<br>ABC(bl3209)                               |   |   |                                   |
| 121 | MOS  | importer | BP(S23_47970)<br>IM(S23_47940)<br>IM(S23_47950)<br>ABC+ABC(S23_47960)                |                            |            |                    | BP(bl3200)<br>IM(bl3202)<br>IM(bl3203)<br>ABC+ABC(bl3201)             |   |   |                                   |
| 122 | OTCN | importer | BP(S23_48050)<br>IM(S23_48060)<br>ABC(S23_48070)                                     |                            |            |                    | BP(bl3192)<br>IM(bl3191)<br>ABC(bl3190)                               |   |   |                                   |
| 123 | HAA  | importer | BP(S23_48140)<br>IM(S23_48120)<br>IM(S23_48130)<br>ABC(S23_48100)<br>ABC(S23_48110)  |                            |            |                    | BP(bl3183)<br>IM(bl3184)<br>IM(bl3185)<br>ABC(bl3186)<br>ABC(bl3187)  |   |   |                                   |
| 124 | OSP  | importer | BP(S23_48270)<br>IM(S23_48250)<br>IM(S23_48260)<br>ABC(S23_48240)                    |                            |            |                    | -                                                                     | - | - | <i>Rhodopseudomonas palustris</i> |
| 125 | HAA  | importer | BP1(S23_50890)<br>BP2(S23_50930)<br>IM(S23_50910)<br>IM(S23_50920)<br>ABC(S23_50900) |                            |            |                    | BP2(bl2922)<br>BP1(bl2926)<br>IM(bl2923)<br>IM(bl2924)<br>ABC(bl2925) |   |   |                                   |
| 126 | PAO  | importer | IM(S23_51020)<br>IM(S23_51030)                                                       |                            | BP,<br>ABC |                    | IM(bl2913)<br>IM(bl2912)                                              |   |   |                                   |

|     |      |          |                                                                                     |               |  |         |                                                                           |   |   |                                                                                  |
|-----|------|----------|-------------------------------------------------------------------------------------|---------------|--|---------|---------------------------------------------------------------------------|---|---|----------------------------------------------------------------------------------|
| 127 | OPN  | importer | BP(S23_51390)<br>IM(S23_51400)<br>IM(S23_51410)<br>ABC(S23_51420)<br>ABC(S23_51430) |               |  |         | BP(bl12877)<br>IM(bl12875)<br>IM(bl12876)<br>ABC(bl12873)<br>ABC(bl12874) |   |   |                                                                                  |
| 128 | OPN  | importer | BP(S23_51470)<br>IM(S23_51480)<br>IM(S23_51490)<br>ABC(S23_51450)<br>ABC(S23_51460) |               |  |         | BP(bl12868)<br>IM(bl12866)<br>IM(bl12867)<br>ABC(bl12869)<br>ABC(bl12870) |   |   |                                                                                  |
| 129 | OTCN | importer | BP(S23_51620)<br>IM(S23_51630)<br>ABC(S23_51610)                                    |               |  |         | BP(bl2837)<br>IM(bl2836)<br>ABC(bl2838)                                   |   |   |                                                                                  |
| 130 | OTCN | importer | BP(S23_51940)<br>IM(S23_51930)<br>ABC(S23_51920)                                    | <i>nrtABC</i> |  | nitrate | BP(bl2803)<br>IM(bl2804)<br>ABC(bl2805)                                   |   |   |                                                                                  |
| 131 | OPN  | importer | BP(S23_52190)<br>IM(S23_52170)<br>IM(S23_52180)<br>ABC(S23_52150)<br>ABC(S23_52160) |               |  |         | -                                                                         | - | - | <i>Geobacter uraniireducens</i> Rf4                                              |
| 132 | DPL  | exporter | IM+ABC(S23_52470)                                                                   |               |  |         | IM+ABC(bl2753)                                                            |   |   |                                                                                  |
| 133 | DPL  | exporter | IM+ABC(S23_53070)<br>IM+ABC(S23_53080)                                              |               |  |         | -                                                                         | - | - | <i>Methylobacterium</i> sp. 4-46<br><i>Methylobacterium nodulans</i><br>ORS 2060 |

|     |     |              |                                                                                     |             |            |  |                                                                      |                                               |                                    |                                                     |
|-----|-----|--------------|-------------------------------------------------------------------------------------|-------------|------------|--|----------------------------------------------------------------------|-----------------------------------------------|------------------------------------|-----------------------------------------------------|
| 134 | OSP | importer     | BP(S23_55680)<br>IM(S23_55700)<br>IM(S23_55710)<br>ABC(S23_55720)<br>ABC(S23_55730) |             |            |  | BP(bl2442)<br>IM(bl2439)<br>IM(bl2440)<br>ABC(bl2437)<br>ABC(bl2438) |                                               |                                    |                                                     |
| 135 | HAA | importer     | BP(S23_56290)                                                                       |             | IM,<br>ABC |  | BP(bl7829)                                                           |                                               |                                    |                                                     |
| 136 | HAA | importer     | BP(S23_57120)                                                                       |             | IM,<br>ABC |  | -                                                                    | -                                             | -                                  | <i>Rhodopseudo<br/>monas<br/>palustris</i><br>BisB5 |
| 137 | HAA | importer     | BP(S23_57300)                                                                       |             | IM,<br>ABC |  | BP(bl12304)                                                          |                                               |                                    |                                                     |
| 138 | HAA | importer     | BP(S23_57690)<br>IM(S23_57670)<br>IM(S23_57680)<br>ABC(S23_57650)<br>ABC(S23_57660) |             |            |  | -                                                                    | -                                             | -                                  | <i>Rhodopseudo<br/>monas<br/>palustris</i>          |
| 139 | PAO | importer     | BP(S23_57970)<br>IM(S23_57960)<br>ABC(S23_57950)                                    |             |            |  | BP(bl2224)<br>IM(bl2225)<br>ABC(bl2226)                              |                                               |                                    |                                                     |
| 140 | MOI | importer     | BP(S23_59210)<br>IM(S23_59220)<br>IM(S23_59230)<br>ABC(S23_59200)                   |             |            |  | -                                                                    | BP(3187)<br>IM(3185)<br>IM(3186)<br>ABC(3188) | <i>Bradyrhizobium</i><br>sp. BTAi1 |                                                     |
| 141 |     | excinuclease | component<br>B(S23_60490)                                                           | <i>uvrB</i> |            |  | component<br>B(bl7431)                                               |                                               |                                    |                                                     |
| 142 |     | excinuclease | component<br>C(S23_61010)                                                           | <i>uvrC</i> |            |  | component<br>C(bl7470)                                               |                                               |                                    |                                                     |
| 143 | FAE | exporter     | IM+ABC(S23_616<br>90)                                                               |             |            |  | IM+ABC(bl7537)                                                       |                                               |                                    |                                                     |



|     |      |          |                                                                                     |                     |            |                         |                                                                      |                                   |                                     |                                                    |
|-----|------|----------|-------------------------------------------------------------------------------------|---------------------|------------|-------------------------|----------------------------------------------------------------------|-----------------------------------|-------------------------------------|----------------------------------------------------|
| 144 | PAO  | importer | BP(S23_62180)<br>IM(S23_62160)<br>IM(S23_62170)<br>ABC(S23_62150)                   | <i>gltLJK<br/>L</i> |            | glutamate/<br>aspartate | BP(bl17600)<br>IM(bl17598)<br>IM(bl17599)<br>ABC(bl17597)            |                                   |                                     |                                                    |
| 145 | OPN  | importer | BP(S23_62310)                                                                       |                     | IM,<br>ABC |                         | BP(bl7616)                                                           |                                   |                                     |                                                    |
| 146 | DPL  | exporter | IM+ABC(S23_625<br>70)                                                               |                     |            |                         | IM+ABC(bl6293)                                                       |                                   |                                     |                                                    |
| 147 | MET  | importer | BP(S23_63330)<br>IM(S23_63340)<br>ABC(S23_63350)                                    |                     |            |                         | BP(bl17769)<br>IM(bl17770)<br>ABC(bl17771)                           |                                   |                                     |                                                    |
| 148 | OPN  | importer | BP(S23_64360)<br>IM(S23_64340)<br>IM(S23_64350)<br>ABC(S23_64320)<br>ABC(S23_64330) |                     |            |                         | BP(bl1353)<br>IM(bl1354)<br>IM(bl1355)<br>ABC(bl1356)<br>ABC(bl1357) |                                   |                                     |                                                    |
| 149 | OTCN | importer | BP(S23_65210)<br>IM(S23_65220)<br>ABC(S23_65230)                                    |                     |            |                         | -                                                                    | -                                 | -                                   | <i>Achromobacte<br/>r piechaudii</i><br>ATCC 43553 |
| 150 | OTCN | importer | BP(S23_65630)                                                                       |                     | IM,<br>ABC |                         | BP(bl1233)                                                           |                                   |                                     |                                                    |
| 151 | NO   | unknown  | ABC(S23_65700)<br>ABC(S23_65710)                                                    | <i>phnKL</i>        |            | phosphonate             | ABC(bl1226)<br>ABC(bl1225)                                           |                                   |                                     |                                                    |
| 152 | PHN  | importer | BP(S23_65790)<br>IM(S23_65770)<br>IM(S23_65780)<br>ABC(S23_65800)                   | <i>phoCD<br/>ET</i> |            | phosphonate             | BP(bl17946)<br>IM(bl17944)<br>IM(bl17945)<br>ABC(bl17947)            |                                   |                                     |                                                    |
| 153 | OTCN | importer | BP(S23_66030)<br>IM(S23_66010)<br>ABC(S23_66020)                                    |                     |            |                         | -                                                                    | BP(5375)<br>IM(5373)<br>ABC(5374) | <i>Bradyrhizobium</i><br>sp. ORS278 |                                                    |

|     |      |          |                                                                                     |                           |            |           |                                                                           |  |  |  |
|-----|------|----------|-------------------------------------------------------------------------------------|---------------------------|------------|-----------|---------------------------------------------------------------------------|--|--|--|
| 154 | PAO  | importer | BP(S23_66470)<br>IM(S23_66480)<br>ABC(S23_66490)                                    |                           |            |           | BP(bl8117)<br>IM(bl8118)<br>ABC(bl8119)                                   |  |  |  |
| 155 | HAA  | importer | BP(S23_66760)                                                                       |                           | IM,<br>ABC |           | BP(bl1147)                                                                |  |  |  |
| 156 | MOS  | importer | BP(S23_66960)<br>IM(S23_66970)<br>ABC(S23_66980)                                    |                           |            |           | BP(bl1123)<br>IM(bl1122)<br>ABC(bl1121)                                   |  |  |  |
| 157 | MOI  | importer | BP(S23_67280)<br>IM(S23_67260)<br>IM(S23_67270)<br>ABC(S23_67250)                   | <i>pstAB</i><br><i>CS</i> |            | phosphate | BP(bl1091)<br>IM(bl1092)<br>IM(bl1093)<br>ABC(bl1094)                     |  |  |  |
| 158 | HAA  | importer | BP(S23_67550)<br>IM(S23_67480)<br>IM(S23_67490)<br>ABC(S23_67460)<br>ABC(S23_67470) |                           |            |           | BP(bl1052)<br>IM(bl1064)<br>IM(bl1065)<br>ABC(bl1066)<br>ABC(bl1067)      |  |  |  |
| 159 | OPN  | importer | BP(S23_67710)<br>IM(S23_67680)<br>IM(S23_67690)<br>ABC+ABC(S23_67670)               |                           |            |           | BP(bl1036)<br>IM(bl1037)<br>IM(bl1038)<br>ABC+ABC(bl1039)                 |  |  |  |
| 160 | o228 | exporter | IM+IM(S23_68050)<br>)<br>ABC(S23_68060)                                             |                           |            |           | IM+IM(bl1001)<br>ABC(bl1002)                                              |  |  |  |
| 161 | OPN  | importer | BP(S23_68140)<br>IM(S23_68150)<br>IM(S23_68160)<br>ABC(S23_68170)<br>ABC(S23_68180) |                           |            |           | BP(bl10993)<br>IM(bl10992)<br>IM(bl10991)<br>ABC(bl10990)<br>ABC(bl10989) |  |  |  |

|     |     |          |                                                                                     |  |  |  |                                                                      |  |  |  |
|-----|-----|----------|-------------------------------------------------------------------------------------|--|--|--|----------------------------------------------------------------------|--|--|--|
| 162 | HAA | importer | BP(S23_68450)<br>IM(S23_68430)<br>IM(S23_68440)<br>ABC(S23_68410)<br>ABC(S23_68420) |  |  |  | BP(bl0967)<br>IM(bl0968)<br>IM(bl0969)<br>ABC(bl0970)<br>ABC(bl0971) |  |  |  |
| 163 | HAA | importer | BP(S23_69170)<br>IM(S23_69180)<br>IM(S23_69190)<br>ABC(S23_69200)<br>ABC(S23_69210) |  |  |  | BP(bl0887)<br>IM(bl0885)<br>IM(bl0886)<br>ABC(bl0883)<br>ABC(bl0884) |  |  |  |

BP, solute-binding protein component; IM, integral membrane protein component; ABC, ATP-binding cassette component; SS, protein with a signal sequence.

\*To classify the systems, at least two components of each ABC system were used in a BLAST search of the ABCISSE database (<http://www.pasteur.fr/recherche/unites/pmtg/abc/index.html>), unless a system was composed of only one component.

\*\*Orthologues were defined as genes whose encoded proteins show more than 70%, 60%, and 50% identities in amino acid sequence when compared with *B. japonicum* USDA110, other *Rhizobiaceae*, and other bacteria, respectively. Orthologues classified as “other *Rhizobiaceae*” were not found in *B. japonicum* USDA110, while those classified as “other bacteria” were not found in either *B. japonicum* USDA110 or *Rhizobiaceae*.

Table S7. Compositions of ABC systems in the genomes of *Bradyrhizobium* sp. S23321 and related species.

| Family* | <i>Bradyrhizobium</i><br>sp. S23321 | <i>Bradyrhizobium</i><br><i>japonicum</i><br>USDA110** | <i>Mesorhizobium</i><br><i>loti</i><br>MAFF303099** | <i>Pseudomonas</i><br><i>putida</i><br>KT2440** | <i>Streptomyces</i><br><i>coelicolor</i><br>A3(2)** | Family definition*                                             | Functions*         |
|---------|-------------------------------------|--------------------------------------------------------|-----------------------------------------------------|-------------------------------------------------|-----------------------------------------------------|----------------------------------------------------------------|--------------------|
| ART     | 2                                   | 5                                                      | 5                                                   | 4                                               | 8                                                   | Antibiotic resistance and translation regulation               | Cellular processes |
| CBY     | 0                                   | 0                                                      | 0                                                   | 0                                               | 3                                                   | Cobalt uptake, unknown                                         | Import             |
| CCM     | 0                                   | 1                                                      | 1                                                   | 1                                               | 0                                                   | Cytochrome C biogenesis                                        | Export             |
| CDI     | 0                                   | 1                                                      | 1                                                   | 1                                               | 1                                                   | Cell division                                                  | Unknown            |
| CLS     | 1                                   | 2                                                      | 1                                                   | 1                                               | 2                                                   | Capsular polysaccharide, lipopolysaccharide and teichoic acids | Export             |
| DLM     | 2                                   | 1                                                      | 1                                                   | 2                                               | 1                                                   | D- L-Methionine and derivatives                                | Import             |
| DPL     | 9                                   | 14                                                     | 15                                                  | 13                                              | 18                                                  | Drugs, Peptides, Lipids                                        | Export             |
| DRA     | 1                                   | 2                                                      | 2                                                   | 1                                               | 16                                                  | Drug and Antibiotic resistance                                 | Unknown            |
| DRI     | 4                                   | 6                                                      | 2                                                   | 2                                               | 14                                                  | Drug resistance, bacteriocin and lantibiotic immunity          | Unknown            |
| EPD     | 0                                   | 0                                                      | 0                                                   | 0                                               | 1                                                   | Eye pigment precursors and drugs                               | Export             |
| FAE     | 2                                   | 3                                                      | 2                                                   | 1                                               | 0                                                   | Very long chain fatty acids                                    | Export             |
| HAA     | 39                                  | 34                                                     | 12                                                  | 6                                               | 3                                                   | Hydrophobic amino acids and amides                             | Import             |
| ISB     | 0                                   | 1                                                      | 1                                                   | 0                                               | 0                                                   | Iron-sulfur centre biogenesis                                  | Cellular processes |
| ISVH    | 2                                   | 12                                                     | 2                                                   | 28                                              | 6                                                   | Iron-Siderophores, Vitamin B-12 and Hemin                      | Import             |
| MET     | 1                                   | 1                                                      | 1                                                   | 2                                               | 2                                                   | Metals                                                         | Import             |
| MKL     | 2                                   | 2                                                      | 1                                                   | 2                                               | 1                                                   |                                                                | Import             |
| MOI     | 15                                  | 16                                                     | 28                                                  | 13                                              | 7                                                   | Mineral and Organic                                            | Import             |
| MOS     | 9                                   | 11                                                     | 37                                                  | 2                                               | 8                                                   | Monosaccharides                                                | Import             |
| NO      | 1                                   | 2                                                      | 7                                                   | 0                                               | 2                                                   | Unclassified systems                                           | Unknown            |
| OPN     | 19                                  | 22                                                     | 30                                                  | 6                                               | 10                                                  | Oligopeptides and Nickel                                       | Import             |
| OSP     | 11                                  | 15                                                     | 26                                                  | 2                                               | 37                                                  | Oligosaccharides and polyols                                   | Import             |

|       |     |     |     |     |     |                                             |                    |
|-------|-----|-----|-----|-----|-----|---------------------------------------------|--------------------|
| OTCN  | 23  | 22  | 16  | 10  | 7   | Osmoprotectants Taurine Cyanate and Nitrate | Import             |
| PAO   | 10  | 17  | 14  | 10  | 4   | Polar amino acid and opines                 | Import             |
| PHN   | 2   | 1   | 2   | 1   | 0   | Phosphonates and phosphites                 | Import             |
| Total | 160 | 201 | 213 | 116 | 171 |                                             |                    |
| UVR   | 2   | 2   | 1   | 2   | 4   | DNA repair and drug resistance              | Cellular processes |
| YHBG  | 0   | 1   | 1   | 1   | 0   |                                             |                    |
| YLU   | 0   | 0   |     | 0   | 2   |                                             | Unknown            |
| o228  | 3   | 7   | 4   | 5   | 14  |                                             | Unknown            |

\*Names and definitions of the families are cited from the ABCISSE database.

\*\*Data were obtained from the ABCISSE database (<http://www.pasteur.fr/recherche/unites/pmtg/abc/index.html>).

**Table S8. Genes for major carbon metabolism pathways in the genome of *Bradyrhizobium* sp. S23321.**

| Pathways                   | Locus tag | KO number | Gene symbol       | Function                                                                                       |
|----------------------------|-----------|-----------|-------------------|------------------------------------------------------------------------------------------------|
| Glycolysis/gluconeogenesis | S23_01500 | K01834    | <i>gpm</i>        | phosphoglycerate mutase [EC:5.4.2.1]                                                           |
| Glycolysis/gluconeogenesis | S23_02590 | K01895    | <i>acs</i>        | acetyl-CoA synthetase [EC:6.2.1.1]                                                             |
| Glycolysis/gluconeogenesis | S23_03930 | K00382    | <i>lpd, pdhD</i>  | dihydrolipoamide dehydrogenase [EC:1.8.1.4]                                                    |
| Glycolysis/gluconeogenesis | S23_06870 | K00128    |                   | aldehyde dehydrogenase (NAD+) [EC:1.2.1.3]                                                     |
| Glycolysis/gluconeogenesis | S23_07050 | K01895    |                   | coenzyme A ligase [EC:6.2.1.1]                                                                 |
| Glycolysis/gluconeogenesis | S23_07640 | K01610    | <i>pckA</i>       | phosphoenolpyruvate carboxykinase (ATP) [EC:4.1.1.49]                                          |
| Glycolysis/gluconeogenesis | S23_08870 | K00121    | <i>adhC</i>       | S-(hydroxymethyl)glutathione dehydrogenase / alcohol dehydrogenase [EC:1.1.1.284 1.1.1.1]      |
| Glycolysis/gluconeogenesis | S23_10960 | K01623    | <i>fbaB</i>       | fructose-bisphosphate aldolase, class I [EC:4.1.2.13]                                          |
| Glycolysis/gluconeogenesis | S23_10970 | K01624    | <i>fbaA</i>       | fructose-bisphosphate aldolase, class II [EC:4.1.2.13]                                         |
| Glycolysis/gluconeogenesis | S23_10980 | K00927    | <i>pgk</i>        | phosphoglycerate kinase [EC:2.7.2.3]                                                           |
| Glycolysis/gluconeogenesis | S23_10990 | K00134    | <i>gapdh</i>      | glyceraldehyde 3-phosphate dehydrogenase [EC:1.2.1.12]                                         |
| Glycolysis/gluconeogenesis | S23_11900 | K00873    | <i>pyk</i>        | pyruvate kinase [EC:2.7.1.40]                                                                  |
| Glycolysis/gluconeogenesis | S23_15550 | K13810    | <i>tal-pgi</i>    | transaldolase / glucose-6-phosphate isomerase [EC:2.2.1.2 5.3.1.9]                             |
| Glycolysis/gluconeogenesis | S23_20800 | K00121    | <i>adhC</i>       | S-(hydroxymethyl)glutathione dehydrogenase / alcohol dehydrogenase [EC:1.1.1.284 1.1.1.1]      |
| Glycolysis/gluconeogenesis | S23_20820 | K00114    |                   | methanol dehydrogenase large subunit-like protein [EC:1.1.99.8]                                |
| Glycolysis/gluconeogenesis | S23_20880 | K00114    |                   | quinoprotein ethanol dehydrogenase precursor [EC:1.1.99.8]                                     |
| Glycolysis/gluconeogenesis | S23_22000 | K01895    | <i>acs</i>        | acetyl-CoA synthetase [EC:6.2.1.1]                                                             |
| Glycolysis/gluconeogenesis | S23_22060 | K00001    | <i>adh</i>        | alcohol dehydrogenase [EC:1.1.1.1]                                                             |
| Glycolysis/gluconeogenesis | S23_23760 | K00128    |                   | aldehyde dehydrogenase (NAD+) [EC:1.2.1.3]                                                     |
| Glycolysis/gluconeogenesis | S23_25980 | K00001    | <i>adh</i>        | alcohol dehydrogenase [EC:1.1.1.1]                                                             |
| Glycolysis/gluconeogenesis | S23_32850 | K00001    | <i>adh</i>        | Iron-containing alcohol dehydrogenase [EC:1.1.1.1]                                             |
| Glycolysis/gluconeogenesis | S23_33100 | K00001    | <i>adh</i>        | alcohol dehydrogenase [EC:1.1.1.1]                                                             |
| Glycolysis/gluconeogenesis | S23_33640 | K01803    | <i>tpiA</i>       | triosephosphate isomerase (TIM) [EC:5.3.1.1]                                                   |
| Glycolysis/gluconeogenesis | S23_33770 | K01689    | <i>eno</i>        | enolase [EC:4.2.1.11]                                                                          |
| Glycolysis/gluconeogenesis | S23_33840 | K00161    | <i>pdhA</i>       | pyruvate dehydrogenase E1 component subunit alpha [EC:1.2.4.1]                                 |
| Glycolysis/gluconeogenesis | S23_33850 | K00162    | <i>pdhB</i>       | pyruvate dehydrogenase E1 component subunit beta [EC:1.2.4.1]                                  |
| Glycolysis/gluconeogenesis | S23_33880 | K00627    | <i>aceF, pdhC</i> | pyruvate dehydrogenase E2 component (dihydrolipoamide acetyltransferase) [EC:2.3.1.12]         |
| Glycolysis/gluconeogenesis | S23_33900 | K00382    | <i>lpd, pdhD</i>  | dihydrolipoamide dehydrogenase [EC:1.8.1.4]                                                    |
| Glycolysis/gluconeogenesis | S23_35620 | K00845    | <i>glk</i>        | glucokinase [EC:2.7.1.2]                                                                       |
| Glycolysis/gluconeogenesis | S23_36470 | K00850    | <i>pfk</i>        | 6-phosphofructokinase [EC:2.7.1.11]                                                            |
| Glycolysis/gluconeogenesis | S23_39180 | K02446    | <i>glpX</i>       | fructose-1,6-bisphosphatase II [EC:3.1.3.11]                                                   |
| Glycolysis/gluconeogenesis | S23_41610 | K00001    | <i>adh</i>        | putative NAD-dependent alcohol dehydrogenase [EC:1.1.1.1]                                      |
| Glycolysis/gluconeogenesis | S23_42810 | K01895    | <i>acs</i>        | acetyl-CoA synthetase [EC:6.2.1.1]                                                             |
| Glycolysis/gluconeogenesis | S23_44870 | K00001    | <i>adh</i>        | Alcohol dehydrogenase GroES domain protein [EC:1.1.1.1]                                        |
| Glycolysis/gluconeogenesis | S23_47910 | K01785    | <i>galM</i>       | aldose 1-epimerase [EC:5.1.3.3]                                                                |
| Glycolysis/gluconeogenesis | S23_51700 | K01834    | <i>gpm</i>        | phosphoglycerate mutase [EC:5.4.2.1]                                                           |
| Glycolysis/gluconeogenesis | S23_51810 | K00128    |                   | aldehyde dehydrogenase (NAD+) [EC:1.2.1.3]                                                     |
| Glycolysis/gluconeogenesis | S23_51820 | K00163    | <i>aceE</i>       | pyruvate dehydrogenase E1 component [EC:1.2.4.1]                                               |
| Glycolysis/gluconeogenesis | S23_52140 | K00001    | <i>adh</i>        | NAD-dependent alcohol dehydrogenase [EC:1.1.1.1]                                               |
| Glycolysis/gluconeogenesis | S23_53980 | K01624    | <i>fbaA</i>       | fructose-bisphosphate aldolase, class II [EC:4.1.2.13]                                         |
| Glycolysis/gluconeogenesis | S23_54010 | K03841    | <i>fbp</i>        | fructose-1,6-bisphosphatase I [EC:3.1.3.11]                                                    |
| Glycolysis/gluconeogenesis | S23_56190 | K01835    | <i>pgm</i>        | phosphoglucomutase [EC:5.4.2.2]                                                                |
| Glycolysis/gluconeogenesis | S23_59680 | K01895    | <i>acs</i>        | acetyl-CoA synthetase [EC:6.2.1.1]                                                             |
| Glycolysis/gluconeogenesis | S23_61840 | K00001    | <i>adh</i>        | alcohol dehydrogenase [EC:1.1.1.1]                                                             |
| Glycolysis/gluconeogenesis | S23_62250 | K00128    |                   | aldehyde dehydrogenase (NAD+) [EC:1.2.1.3]                                                     |
| Glycolysis/gluconeogenesis | S23_66610 | K01835    | <i>pgm</i>        | phosphoglucomutase [EC:5.4.2.2]                                                                |
| Glycolysis/gluconeogenesis | S23_67390 | K01895    | <i>acs</i>        | acetyl-CoA synthetase [EC:6.2.1.1]                                                             |
| Glycolysis/gluconeogenesis | S23_68350 | K01895    | <i>acs</i>        | acetyl-CoA synthetase [EC:6.2.1.1]                                                             |
| Citrate cycle              | S23_03230 | K00240    | <i>sdhB</i>       | succinate dehydrogenase iron-sulfur protein [EC:1.3.99.1]                                      |
| Citrate cycle              | S23_03240 | K00239    | <i>sdhA</i>       | succinate dehydrogenase flavoprotein subunit [EC:1.3.99.1]                                     |
| Citrate cycle              | S23_03250 | K00242    | <i>sdhD</i>       | succinate dehydrogenase hydrophobic membrane anchor protein [EC:1.3.99.1]                      |
| Citrate cycle              | S23_03260 | K00241    | <i>sdhC</i>       | succinate dehydrogenase cytochrome b-556 subunit [EC:1.3.99.1]                                 |
| Citrate cycle              | S23_03410 | K01644    | <i>citE</i>       | citrate lyase subunit beta / citryl-CoA lyase [EC:4.1.3.6 4.1.3.34]                            |
| Citrate cycle              | S23_03750 | K01681    | <i>acnA</i>       | aconitate hydratase 1 [EC:4.2.1.3]                                                             |
| Citrate cycle              | S23_03860 | K00024    | <i>mdh</i>        | malate dehydrogenase [EC:1.1.1.37]                                                             |
| Citrate cycle              | S23_03870 | K01903    | <i>sucC</i>       | succinyl-CoA synthetase beta subunit [EC:6.2.1.5]                                              |
| Citrate cycle              | S23_03890 | K01902    | <i>sucD</i>       | succinyl-CoA synthetase alpha subunit [EC:6.2.1.5]                                             |
| Citrate cycle              | S23_03900 | K00164    | <i>sucA</i>       | 2-oxoglutarate dehydrogenase E1 component [EC:1.2.4.2]                                         |
| Citrate cycle              | S23_03910 | K00658    | <i>sucB</i>       | 2-oxoglutarate dehydrogenase E2 component (dihydrolipoamide succinyltransferase) [EC:2.3.1.61] |
| Citrate cycle              | S23_03930 | K00382    | <i>lpd, pdhD</i>  | dihydrolipoamide dehydrogenase [EC:1.8.1.4]                                                    |
| Citrate cycle              | S23_06190 | K01647    | <i>glfA</i>       | citrate synthase [EC:2.3.3.1]                                                                  |
| Citrate cycle              | S23_06200 | K01647    | <i>glfA</i>       | citrate synthase [EC:2.3.3.1]                                                                  |
| Citrate cycle              | S23_07640 | K01610    | <i>pckA</i>       | phosphoenolpyruvate carboxykinase (ATP) [EC:4.1.1.49]                                          |
| Citrate cycle              | S23_14960 | K01644    | <i>citE</i>       | citrate lyase subunit beta / citryl-CoA lyase [EC:4.1.3.6 4.1.3.34]                            |
| Citrate cycle              | S23_15690 | K00175    | <i>korB</i>       | 2-oxoglutarate ferredoxin oxidoreductase subunit beta [EC:1.2.7.3]                             |
| Citrate cycle              | S23_15700 | K00174    | <i>korA</i>       | 2-oxoglutarate ferredoxin oxidoreductase subunit alpha [EC:1.2.7.3]                            |
| Citrate cycle              | S23_18170 | K01679    | <i>fumC</i>       | fumarate hydratase, class II [EC:4.2.1.2]                                                      |
| Citrate cycle              | S23_24400 | K01676    |                   | fumarate hydratase, class I [EC:4.2.1.2]                                                       |
| Citrate cycle              | S23_24990 | K00031    | <i>icd</i>        | isocitrate dehydrogenase [EC:1.1.1.42]                                                         |
| Citrate cycle              | S23_33420 | K01647    |                   | type II citrate synthase                                                                       |
| Citrate cycle              | S23_33840 | K00161    | <i>pdhA</i>       | pyruvate dehydrogenase E1 component subunit alpha [EC:1.2.4.1]                                 |
| Citrate cycle              | S23_33850 | K00162    | <i>pdhB</i>       | pyruvate dehydrogenase E1 component subunit beta [EC:1.2.4.1]                                  |
| Citrate cycle              | S23_33880 | K00627    | <i>aceF, pdhC</i> | pyruvate dehydrogenase E2 component (dihydrolipoamide acetyltransferase) [EC:2.3.1.12]         |
| Citrate cycle              | S23_33900 | K00382    | <i>lpd, pdhD</i>  | dihydrolipoamide dehydrogenase [EC:1.8.1.4]                                                    |
| Citrate cycle              | S23_51820 | K00163    | <i>aceE</i>       | pyruvate dehydrogenase E1 component [EC:1.2.4.1]                                               |
| Pentose phosphate pathway  | S23_04680 | K07404    | <i>pgl</i>        | 6-phosphogluconolactonase [EC:3.1.1.31]                                                        |
| Pentose phosphate pathway  | S23_10960 | K01623    | <i>fbaB</i>       | fructose-bisphosphate aldolase, class I [EC:4.1.2.13]                                          |
| Pentose phosphate pathway  | S23_10970 | K01624    | <i>fbaA</i>       | fructose-1,6-bisphosphate aldolase, class II [EC:4.1.2.13]                                     |
| Pentose phosphate pathway  | S23_11000 | K00615    |                   | transketolase [EC:2.2.1.1]                                                                     |

|                           |           |        |                   |                                                                                                                             |
|---------------------------|-----------|--------|-------------------|-----------------------------------------------------------------------------------------------------------------------------|
| Pentose phosphate pathway | S23_11440 | K00034 | <i>gdh</i>        | glucose 1-dehydrogenase [EC:1.1.1.47]                                                                                       |
| Pentose phosphate pathway | S23_12580 | K00090 |                   | gluconate 2-dehydrogenase [EC:1.1.1.215]                                                                                    |
| Pentose phosphate pathway | S23_14520 | K00115 |                   | glucose dehydrogenase (acceptor) [EC:1.1.99.10]                                                                             |
| Pentose phosphate pathway | S23_15510 | K00851 | <i>gntK, idnK</i> | gluconokinase [EC:2.7.1.12]                                                                                                 |
| Pentose phosphate pathway | S23_15520 | K01057 | <i>pgl, devB</i>  | 6-phosphogluconolactonase [EC:3.1.1.31]                                                                                     |
| Pentose phosphate pathway | S23_15530 | K00036 | <i>G6PD, zwf</i>  | glucose-6-phosphate 1-dehydrogenase [EC:1.1.1.49]                                                                           |
| Pentose phosphate pathway | S23_15540 | K00033 | <i>gnd</i>        | 6-phosphogluconate dehydrogenase [EC:1.1.1.44]                                                                              |
| Pentose phosphate pathway | S23_15550 | K13810 | <i>tal-pgi</i>    | transaldolase / glucose-6-phosphate isomerase [EC:2.2.1.2<br>5.3.1.9]                                                       |
| Pentose phosphate pathway | S23_18910 | K01053 |                   | gluconolactonase [EC:3.1.1.17]                                                                                              |
| Pentose phosphate pathway | S23_22510 | K00615 | <i>tktA</i>       | transketolase subunit A                                                                                                     |
| Pentose phosphate pathway | S23_22520 | K00615 |                   | transketolase domain-containing protein                                                                                     |
| Pentose phosphate pathway | S23_24770 | K00117 | <i>gcd</i>        | quinoprotein glucose dehydrogenase [EC:1.1.5.2]                                                                             |
| Pentose phosphate pathway | S23_25720 | K01783 | <i>rpe</i>        | ribulose-phosphate 3-epimerase [EC:5.1.3.1]                                                                                 |
| Pentose phosphate pathway | S23_36470 | K00850 | <i>pfk</i>        | 6-phosphofructokinase [EC:2.7.1.11]                                                                                         |
| Pentose phosphate pathway | S23_39180 | K02446 | <i>glpX</i>       | fructose-1,6-bisphosphatase II [EC:3.1.3.11]                                                                                |
| Pentose phosphate pathway | S23_41990 | K01808 | <i>rpiB</i>       | ribose 5-phosphate isomerase B [EC:5.3.1.6]                                                                                 |
| Pentose phosphate pathway | S23_43110 | K01625 | <i>eda</i>        | 2-dehydro-3-deoxyphosphogluconate aldolase / 4-hydroxy-<br>2-oxoglutarate aldolase [EC:4.1.2.14 4.1.3.16]                   |
| Pentose phosphate pathway | S23_43120 | K00874 | <i>kdgK</i>       | 2-dehydro-3-deoxygluconokinase [EC:2.7.1.45]                                                                                |
| Pentose phosphate pathway | S23_44940 | K01807 | <i>rpiA</i>       | ribose 5-phosphate isomerase A [EC:5.3.1.6]                                                                                 |
| Pentose phosphate pathway | S23_48880 | K00948 |                   | phosphoribosylpyrophosphate synthetase                                                                                      |
| Pentose phosphate pathway | S23_50560 | K01053 |                   | gluconolactonase [EC:3.1.1.17]                                                                                              |
| Pentose phosphate pathway | S23_51670 | K00852 | <i>rbsK</i>       | ribokinase [EC:2.7.1.15]                                                                                                    |
| Pentose phosphate pathway | S23_51800 | K01053 |                   | gluconolactonase [EC:3.1.1.17]                                                                                              |
| Pentose phosphate pathway | S23_53940 | K01783 | <i>rpe</i>        | ribulose-phosphate 3-epimerase [EC:5.1.3.1]                                                                                 |
| Pentose phosphate pathway | S23_53980 | K01624 | <i>fbaA</i>       | fructose-1,6-bisphosphate aldolase, class II [EC:4.1.2.13]                                                                  |
| Pentose phosphate pathway | S23_53990 | K00615 |                   | transketolase [EC:2.2.1.1]                                                                                                  |
| Pentose phosphate pathway | S23_54010 | K03841 | <i>fbp</i>        | fructose-1,6-bisphosphatase I [EC:3.1.3.11]                                                                                 |
| Pentose phosphate pathway | S23_56190 | K01835 | <i>pgm</i>        | phosphoglucomutase [EC:5.4.2.2]                                                                                             |
| Pentose phosphate pathway | S23_60720 | K00948 | <i>prsA</i>       | ribose-phosphate pyrophosphokinase [EC:2.7.6.1]                                                                             |
| Pentose phosphate pathway | S23_65680 | K05774 | <i>phnN</i>       | ribose 1,5-bisphosphokinase [EC:2.7.4.23]                                                                                   |
| Pentose phosphate pathway | S23_66610 | K01835 |                   | phosphoglucomutase phosphomannomutase protein<br>[EC:5.4.2.2]                                                               |
| Glyoxylate cycle          | S23_03750 | K01681 | <i>acnA</i>       | aconitate hydratase [EC:4.2.1.3]                                                                                            |
| Glyoxylate cycle          | S23_03860 | K00024 | <i>mdh</i>        | malate dehydrogenase [EC:1.1.1.37]                                                                                          |
| Glyoxylate cycle          | S23_06190 | K01647 | <i>glfA</i>       | citrate synthase [EC:2.3.3.1]                                                                                               |
| Glyoxylate cycle          | S23_06200 | K01647 | <i>glfA</i>       | citrate synthase [EC:2.3.3.1]                                                                                               |
| Glyoxylate cycle          | S23_10380 | K01638 | <i>aceB</i>       | malate synthase [EC:2.3.3.9]                                                                                                |
| Glyoxylate cycle          | S23_33420 | K01647 |                   | type II citrate synthase                                                                                                    |
| Glyoxylate cycle          | S23_55560 | K01637 | <i>aceA</i>       | isocitrate lyase [EC:4.1.3.1]                                                                                               |
| Fatty acid biosynthesis   | S23_00580 | K00208 | <i>fabI</i>       | enoyl-[acyl-carrier protein] reductase I [EC:1.3.1.9]                                                                       |
| Fatty acid biosynthesis   | S23_00590 | K00647 | <i>fabB</i>       | 3-oxoacyl-[acyl-carrier-protein] synthase I [EC:2.3.1.41]                                                                   |
| Fatty acid biosynthesis   | S23_00600 | K01716 | <i>fabA</i>       | 3-hydroxydecanoyl-[acyl-carrier-protein] dehydratase<br>[EC:4.2.1.60]                                                       |
| Fatty acid biosynthesis   | S23_00860 | K01963 | <i>accD</i>       | acetyl-CoA carboxylase carboxyl transferase subunit beta<br>[EC:6.4.1.2]                                                    |
| Fatty acid biosynthesis   | S23_06100 | K01962 | <i>accA</i>       | acetyl-CoA carboxylase carboxyl transferase subunit alpha<br>[EC:6.4.1.2]                                                   |
| Fatty acid biosynthesis   | S23_08970 | K00059 |                   | putative 3-oxoacyl-[acyl-carrier-protein] reductase                                                                         |
| Fatty acid biosynthesis   | S23_08990 | K00059 | <i>fabG</i>       | 3-oxoacyl-[acyl-carrier protein] reductase [EC:1.1.1.100]                                                                   |
| Fatty acid biosynthesis   | S23_09040 | K00059 |                   | putative oxidoreductase protein                                                                                             |
| Fatty acid biosynthesis   | S23_10650 | K00059 |                   | oxidoreductase                                                                                                              |
| Fatty acid biosynthesis   | S23_13540 | K00645 | <i>fabD</i>       | [acyl-carrier-protein] S-malonyltransferase [EC:2.3.1.39]                                                                   |
| Fatty acid biosynthesis   | S23_14920 | K00059 |                   | short-chain dehydrogenase/reductase SDR                                                                                     |
| Fatty acid biosynthesis   | S23_26180 | K00059 |                   | putative 3-oxoacyl-[acyl-carrier-protein] reductase                                                                         |
| Fatty acid biosynthesis   | S23_28390 | K00059 |                   | short chain dehydrogenase                                                                                                   |
| Fatty acid biosynthesis   | S23_31900 | K00648 | <i>fabH</i>       | 3-oxoacyl-[acyl-carrier-protein] synthase III [EC:2.3.1.180]                                                                |
| Fatty acid biosynthesis   | S23_33370 | K02372 | <i>fabZ</i>       | 3R-hydroxymyristoyl ACP dehydrase [EC:4.2.1.-]                                                                              |
| Fatty acid biosynthesis   | S23_39410 | K01716 | <i>fabA</i>       | 3-hydroxydecanoyl-[acyl-carrier-protein] dehydratase<br>[EC:4.2.1.60]                                                       |
| Fatty acid biosynthesis   | S23_39920 | K02160 | <i>accB, bccP</i> | acetyl-CoA carboxylase biotin carboxyl carrier protein                                                                      |
| Fatty acid biosynthesis   | S23_39930 | K01961 | <i>accC</i>       | acetyl-CoA carboxylase, biotin carboxylase subunit<br>[EC:6.4.1.2 6.3.4.14]                                                 |
| Fatty acid biosynthesis   | S23_41730 | K09458 | <i>fabF</i>       | 3-oxoacyl-[acyl-carrier-protein] synthase II [EC:2.3.1.179]                                                                 |
| Fatty acid biosynthesis   | S23_41750 | K00059 | <i>fabG</i>       | 3-oxoacyl-[acyl-carrier protein] reductase [EC:1.1.1.100]                                                                   |
| Fatty acid biosynthesis   | S23_41760 | K00645 | <i>fabD</i>       | [acyl-carrier-protein] S-malonyltransferase [EC:2.3.1.39]                                                                   |
| Fatty acid biosynthesis   | S23_42340 | K00059 |                   | short chain dehydrogenase                                                                                                   |
| Fatty acid biosynthesis   | S23_43210 | K00059 | <i>fabG</i>       | 3-oxoacyl-[acyl-carrier protein] reductase [EC:1.1.1.100]                                                                   |
| Fatty acid biosynthesis   | S23_44390 | K02372 |                   | hydroxymyristoyl-acyl carrier protein dehydratase                                                                           |
| Fatty acid biosynthesis   | S23_44400 | K09458 | <i>fabF</i>       | 3-oxoacyl-[acyl-carrier-protein] synthase II [EC:2.3.1.179]                                                                 |
| Fatty acid biosynthesis   | S23_44410 | K09458 | <i>fabF</i>       | 3-oxoacyl-[acyl-carrier-protein] synthase II [EC:2.3.1.179]                                                                 |
| Fatty acid biosynthesis   | S23_49720 | K00059 |                   | putative oxidoreductase                                                                                                     |
| Fatty acid biosynthesis   | S23_52530 | K00059 | <i>fabG</i>       | 3-oxoacyl-[acyl-carrier protein] reductase [EC:1.1.1.100]                                                                   |
| Fatty acid biosynthesis   | S23_53350 | K00208 | <i>fabI</i>       | enoyl-[acyl-carrier protein] reductase I [EC:1.3.1.9]                                                                       |
| Fatty acid biosynthesis   | S23_54560 | K09458 | <i>fabF</i>       | 3-oxoacyl-[acyl-carrier-protein] synthase II [EC:2.3.1.179]                                                                 |
| Fatty acid biosynthesis   | S23_63450 | K00059 |                   | putative 3-oxoacyl-acyl-carrier-protein reductase                                                                           |
| Fatty acid biosynthesis   | S23_65650 | K00059 | <i>fabG</i>       | 3-oxoacyl-[acyl-carrier protein] reductase [EC:1.1.1.100]                                                                   |
| Fatty acid metabolism     | S23_02800 | K01692 | <i>paaG</i>       | enoyl-CoA hydratase [EC:4.2.1.17]                                                                                           |
| Fatty acid metabolism     | S23_05760 | K00626 | <i>atoB</i>       | acetyl-CoA acetyltransferase [EC:2.3.1.9]                                                                                   |
| Fatty acid metabolism     | S23_06590 | K01692 | <i>paaG</i>       | enoyl-CoA hydratase [EC:4.2.1.17]                                                                                           |
| Fatty acid metabolism     | S23_06610 | K01692 | <i>paaG</i>       | enoyl-CoA hydratase [EC:4.2.1.17]                                                                                           |
| Fatty acid metabolism     | S23_06630 | K00249 |                   | putative acyl-CoA dehydrogenase                                                                                             |
| Fatty acid metabolism     | S23_06870 | K00128 |                   | aldehyde dehydrogenase (NAD+) [EC:1.2.1.3]                                                                                  |
| Fatty acid metabolism     | S23_06880 | K00249 |                   | putative acyl-CoA dehydrogenase                                                                                             |
| Fatty acid metabolism     | S23_07750 | K01782 | <i>fadJ</i>       | 3-hydroxyacyl-CoA dehydrogenase / enoyl-CoA hydratase /<br>3-hydroxybutyryl-CoA epimerase [EC:1.1.1.35 4.2.1.17<br>5.1.2.3] |
| Fatty acid metabolism     | S23_07760 | K00626 | <i>atoB</i>       | acetyl-CoA acetyltransferase [EC:2.3.1.9]                                                                                   |
| Fatty acid metabolism     | S23_08560 | K01897 |                   | putative fatty acid-CoA ligase                                                                                              |
| Fatty acid metabolism     | S23_08840 | K01692 | <i>paaG</i>       | enoyl-CoA hydratase [EC:4.2.1.17]                                                                                           |
| Fatty acid metabolism     | S23_08870 | K00121 | <i>adhC</i>       | S-(hydroxymethyl)glutathione dehydrogenase / alcohol<br>dehydrogenase [EC:1.1.1.284 1.1.1.1]                                |
| Fatty acid metabolism     | S23_09440 | K01692 | <i>paaG</i>       | enoyl-CoA hydratase [EC:4.2.1.17]                                                                                           |
| Fatty acid metabolism     | S23_09670 | K07516 | <i>fadN</i>       | 3-hydroxyacyl-CoA dehydrogenase [EC:1.1.1.35]                                                                               |
| Fatty acid metabolism     | S23_09680 | K01897 | <i>fadD</i>       | long-chain acyl-CoA synthetase [EC:6.2.1.3]                                                                                 |
| Fatty acid metabolism     | S23_15020 | K00249 |                   | putative acyl-CoA dehydrogenase                                                                                             |
| Fatty acid metabolism     | S23_15230 | K01692 | <i>paaG</i>       | enoyl-CoA hydratase [EC:4.2.1.17]                                                                                           |
| Fatty acid metabolism     | S23_20220 | K01692 | <i>paaG</i>       | enoyl-CoA hydratase [EC:4.2.1.17]                                                                                           |

|                       |           |        |             |                                                                                                                                         |
|-----------------------|-----------|--------|-------------|-----------------------------------------------------------------------------------------------------------------------------------------|
| Fatty acid metabolism | S23_20800 | K00121 | <i>adhC</i> | S-(hydroxymethyl)glutathione dehydrogenase / alcohol dehydrogenase [EC:1.1.1.284 1.1.1.1]                                               |
| Fatty acid metabolism | S23_21190 | K00626 | <i>atoB</i> | acetyl-CoA acetyltransferase [EC:2.3.1.9]                                                                                               |
| Fatty acid metabolism | S23_21940 | K01692 | <i>paaG</i> | enoyl-CoA hydratase [EC:4.2.1.17]                                                                                                       |
| Fatty acid metabolism | S23_22060 | K00001 | <i>adh</i>  | alcohol dehydrogenase [EC:1.1.1.1]                                                                                                      |
| Fatty acid metabolism | S23_22280 | K01692 | <i>paaG</i> | enoyl-CoA hydratase [EC:4.2.1.17]                                                                                                       |
| Fatty acid metabolism | S23_22320 | K01692 | <i>paaG</i> | enoyl-CoA hydratase [EC:4.2.1.17]                                                                                                       |
| Fatty acid metabolism | S23_22820 | K01897 | <i>fadD</i> | long-chain acyl-CoA synthetase [EC:6.2.1.3]                                                                                             |
| Fatty acid metabolism | S23_23760 | K00128 |             | aldehyde dehydrogenase (NAD+) [EC:1.2.1.3]                                                                                              |
| Fatty acid metabolism | S23_25980 | K00001 | <i>adh</i>  | alcohol dehydrogenase [EC:1.1.1.1]                                                                                                      |
| Fatty acid metabolism | S23_26450 | K01692 | <i>paaG</i> | enoyl-CoA hydratase [EC:4.2.1.17]                                                                                                       |
| Fatty acid metabolism | S23_26590 | K01692 |             | 3-hydroxybutyryl-CoA dehydratase                                                                                                        |
| Fatty acid metabolism | S23_28520 | K00248 | <i>bcd</i>  | butyryl-CoA dehydrogenase [EC:1.3.99.2]                                                                                                 |
| Fatty acid metabolism | S23_29420 | K00626 | <i>atoB</i> | acetyl-CoA acetyltransferase [EC:2.3.1.9]                                                                                               |
| Fatty acid metabolism | S23_32210 | K01692 | <i>paaG</i> | enoyl-CoA hydratase [EC:4.2.1.17]                                                                                                       |
| Fatty acid metabolism | S23_32850 | K00001 | <i>adh</i>  | Iron-containing alcohol dehydrogenase [EC:1.1.1.1]                                                                                      |
| Fatty acid metabolism | S23_33100 | K00001 | <i>adh</i>  | alcohol dehydrogenase [EC:1.1.1.1]                                                                                                      |
| Fatty acid metabolism | S23_41610 | K00001 | <i>adh</i>  | putative NAD-dependent alcohol dehydrogenase [EC:1.1.1.1]                                                                               |
| Fatty acid metabolism | S23_42830 | K01692 | <i>paaG</i> | enoyl-CoA hydratase [EC:4.2.1.17]                                                                                                       |
| Fatty acid metabolism | S23_42840 | K00248 | <i>bcd</i>  | butyryl-CoA dehydrogenase [EC:1.3.99.2]                                                                                                 |
| Fatty acid metabolism | S23_42890 | K01692 | <i>paaG</i> | enoyl-CoA hydratase [EC:4.2.1.17]                                                                                                       |
| Fatty acid metabolism | S23_42900 | K00626 | <i>atoB</i> | acetyl-CoA acetyltransferase [EC:2.3.1.9]                                                                                               |
| Fatty acid metabolism | S23_43100 | K00626 | <i>atoB</i> | acetyl-CoA acetyltransferase [EC:2.3.1.9]                                                                                               |
| Fatty acid metabolism | S23_43840 | K00248 | <i>bcd</i>  | butyryl-CoA dehydrogenase [EC:1.3.99.2]                                                                                                 |
| Fatty acid metabolism | S23_44870 | K00001 | <i>adh</i>  | Alcohol dehydrogenase GroES domain protein [EC:1.1.1.1]                                                                                 |
| Fatty acid metabolism | S23_49640 | K01692 | <i>paaG</i> | enoyl-CoA hydratase [EC:4.2.1.17]                                                                                                       |
| Fatty acid metabolism | S23_50120 | K00249 |             | putative acyl-CoA dehydrogenase                                                                                                         |
| Fatty acid metabolism | S23_50610 | K01692 | <i>paaG</i> | enoyl-CoA hydratase [EC:4.2.1.17]                                                                                                       |
| Fatty acid metabolism | S23_50620 | K01897 |             | acyl-CoA synthetase                                                                                                                     |
| Fatty acid metabolism | S23_50630 | K01692 | <i>paaG</i> | enoyl-CoA hydratase [EC:4.2.1.17]                                                                                                       |
| Fatty acid metabolism | S23_50660 | K00249 |             | acyl-CoA dehydrogenase [EC:1.3.99.3]                                                                                                    |
| Fatty acid metabolism | S23_50700 | K01692 | <i>paaG</i> | enoyl-CoA hydratase [EC:4.2.1.17]                                                                                                       |
| Fatty acid metabolism | S23_50730 | K00249 |             | acyl-CoA dehydrogenase [EC:1.3.99.3]                                                                                                    |
| Fatty acid metabolism | S23_50770 | K00626 | <i>atoB</i> | acetyl-CoA acetyltransferase [EC:2.3.1.9]                                                                                               |
| Fatty acid metabolism | S23_51680 | K00529 | <i>hcaD</i> | ferredoxin--NAD+ reductase [EC:1.18.1.3]                                                                                                |
| Fatty acid metabolism | S23_51690 | K01692 | <i>paaG</i> | enoyl-CoA hydratase [EC:4.2.1.17]                                                                                                       |
| Fatty acid metabolism | S23_51810 | K00128 |             | aldehyde dehydrogenase (NAD+) [EC:1.2.1.3]                                                                                              |
| Fatty acid metabolism | S23_52100 | K01692 | <i>paaG</i> | enoyl-CoA hydratase [EC:4.2.1.17]                                                                                                       |
| Fatty acid metabolism | S23_52140 | K00001 | <i>adh</i>  | NAD-dependent alcohol dehydrogenase [EC:1.1.1.1]                                                                                        |
| Fatty acid metabolism | S23_53170 | K01692 |             | putative enoyl-CoA hydratase protein                                                                                                    |
| Fatty acid metabolism | S23_53480 | K00252 | <i>gcdH</i> | glutaryl-CoA dehydrogenase [EC:1.3.99.7]                                                                                                |
| Fatty acid metabolism | S23_55820 | K01782 |             | putative fatty acid oxidation complex alpha subunit                                                                                     |
| Fatty acid metabolism | S23_55830 | K00626 | <i>atoB</i> | acetyl-CoA acetyltransferase [EC:2.3.1.9]                                                                                               |
| Fatty acid metabolism | S23_55840 | K06445 | <i>fadE</i> | acyl-CoA dehydrogenase [EC:1.3.99.-]                                                                                                    |
| Fatty acid metabolism | S23_57030 | K05939 | <i>aas</i>  | acyl-[acyl-carrier-protein]-phospholipid O-acyltransferase / long-chain-fatty-acid-[acyl-carrier-protein] ligase [EC:2.3.1.40 6.2.1.20] |
| Fatty acid metabolism | S23_57920 | K01692 | <i>paaG</i> | enoyl-CoA hydratase [EC:4.2.1.17]                                                                                                       |
| Fatty acid metabolism | S23_58960 | K01692 | <i>paaG</i> | enoyl-CoA hydratase [EC:4.2.1.17]                                                                                                       |
| Fatty acid metabolism | S23_58980 | K00249 |             | acyl-CoA dehydrogenase [EC:1.3.99.3]                                                                                                    |
| Fatty acid metabolism | S23_60100 | K00626 | <i>atoB</i> | acetyl-CoA acetyltransferase [EC:2.3.1.9]                                                                                               |
| Fatty acid metabolism | S23_61840 | K00001 | <i>adh</i>  | alcohol dehydrogenase [EC:1.1.1.1]                                                                                                      |
| Fatty acid metabolism | S23_62250 | K00128 |             | aldehyde dehydrogenase (NAD+) [EC:1.2.1.3]                                                                                              |
| Fatty acid metabolism | S23_63640 | K01692 |             | putative enoyl-CoA hydratase                                                                                                            |
| Fatty acid metabolism | S23_63670 | K00626 | <i>atoB</i> | acetyl-CoA acetyltransferase [EC:2.3.1.9]                                                                                               |
| Fatty acid metabolism | S23_63680 | K01897 |             | acyl-CoA synthetase                                                                                                                     |
| Fatty acid metabolism | S23_64820 | K01897 |             | acyl-CoA synthetase                                                                                                                     |
| Fatty acid metabolism | S23_65090 | K01897 | <i>fadD</i> | long-chain acyl-CoA synthetase [EC:6.2.1.3]                                                                                             |
| Fatty acid metabolism | S23_65860 | K01692 |             | enoyl-CoA hydratase/isomerase                                                                                                           |
| Fatty acid metabolism | S23_66190 | K01692 |             | Enoyl-CoA hydratase/isomerase                                                                                                           |
| Fatty acid metabolism | S23_67360 | K01692 | <i>paaG</i> | enoyl-CoA hydratase [EC:4.2.1.17]                                                                                                       |
| Fatty acid metabolism | S23_68130 | K01897 |             | acyl-CoA synthetase                                                                                                                     |
| Fatty acid metabolism | S23_68250 | K00249 |             | acyl-CoA dehydrogenase [EC:1.3.99.3]                                                                                                    |
| Fatty acid metabolism | S23_68550 | K00249 |             | acyl-CoA dehydrogenase [EC:1.3.99.3]                                                                                                    |



Table S9. Comparison of the genes for nitrogen metabolism between *Bradyrhizobium* sp. S23321 and its close relatives.

| Strains                                 | Genes       |             |                |                                    |            |            |             |
|-----------------------------------------|-------------|-------------|----------------|------------------------------------|------------|------------|-------------|
|                                         | <i>nosZ</i> | <i>aspA</i> | L-asparaginase | asparagine synthase                | <i>gdh</i> | <i>nit</i> | <i>nadE</i> |
| <i>Bradyrhizobium</i> sp. S23321        | -           | S23_64740   | -              | -                                  | -          | -          | S23_44610   |
| <i>Bradyrhizobium japonicum</i> USDA110 | blr0315     | blr1326     | bll4950        | bll6010, blr6298                   | blr7995    | blr3397    | blr3780     |
| <i>Bradyrhizobium</i> sp. BTAi1         | BBta_6008   | -           | -              | BBta_3705, BBta_5624, BBta_7206    | BBta_2839  | -          | BBta_3495   |
| <i>Bradyrhizobium</i> sp. ORS278        | -           | -           | -              | BRADO0860, BRADO4822,<br>BRADO5156 | BRADO2494  | -          | -           |

Note: *nosZ*, nitrous oxide (N<sub>2</sub>O) reductase (EC:1.7.99.6); *aspA*, aspartate ammonia lyase (EC:4.3.1.1); L-asparaginase, EC:3.5.1.1; asparagine synthase, EC:6.3.5.4; *gdh*, glutamate dehydrogenase (EC:1.4.1.2) or (EC:1.4.1.3); *nit*, nitrilase (EC:3.5.5.1); *nadE*, NAD<sup>+</sup> synthase (EC:6.3.1.5).

Table S10. Comparison of genes for L-Asn-tRNA biosynthesis of S23321 and its close relatives.

| Strains                                 | Genes       |             |             |             |
|-----------------------------------------|-------------|-------------|-------------|-------------|
|                                         | <i>asnS</i> | <i>gatA</i> | <i>gatB</i> | <i>gatC</i> |
| <i>Bradyrhizobium</i> sp. S23321        | -           | S23_31310   | S23_31330   | S23_31290   |
| <i>Bradyrhizobium japonicum</i> USDA110 | -           | bll5089     | bll5087     | bsl5090     |
| <i>Bradyrhizobium</i> sp. BTai1         | -           | BBta_4711   | BBta_4709   | BBta_4713   |
| <i>Bradyrhizobium</i> sp. ORS278        | -           | BRADO4489   | BRADO4486   | BRADO4491   |

Note: *asnS*, asparaginyl-tRNA synthetase (EC:6.1.1.22); *gatA*, aspartyl/glutamyl-tRNA amidotransferase subunit A (EC:6.3.5.6; EC:6.3.5.7); *gatB*, aspartyl/glutamyl-tRNA amidotransferase subunit B (EC:6.3.5.6; EC:6.3.5.7); *gatC*, aspartyl/glutamyl-tRNA amidotransferase subunit C (EC:6.3.5.6; EC:6.3.5.7).

Table S11. Comparison of genes for degradation of vanillin and related compounds between *Bradyrhizobium* sp. S23321 and *B. japonicum* USDA110.

| Genes of <i>Bradyrhizobium japonicum</i> USDA 110                 | Gene ID of <i>Bradyrhizobium</i> sp. S23321 | Start and end position (bp) in S23321 genome |           | Amino acid identity (%)* |
|-------------------------------------------------------------------|---------------------------------------------|----------------------------------------------|-----------|--------------------------|
| <i>hcaB1</i> ; periplasmic nitrate reductase protein              | S23_00210                                   | 27,435                                       | 28,928    | 33                       |
| <i>hcaB2</i> ; vanillin: NAD oxidoreductase                       | S23_00210                                   | 27,435                                       | 28,928    | 35                       |
| <i>vanA1</i> ; vanillate O-demethylase oxygenase subunit          | S23_56180                                   | 5,788,215                                    | 5,789,264 | 94                       |
| <i>vanB1</i> ; putative dioxygenase subunit                       | S23_56160                                   | 5,786,474                                    | 5,787,454 | 87                       |
| <i>vanA2</i> ; probable dioxygenase                               | S23_67440                                   | 6,993,093                                    | 6,994,451 | 92                       |
| <i>pobA1</i> ; 4-hydroxybenzoate hydroxylase                      | S23_56910                                   | 5,887,496                                    | 5,888,668 | 87                       |
| <i>pobA2</i> ; 4-hydroxybenzoate hydroxylase                      | S23_09490                                   | 1,002,452                                    | 1,003,621 | 48                       |
| <i>pcaG1</i> ; protocatechuate 3,4-dioxygenase alpha chain        | S23_56960                                   | 5,891,930                                    | 5,892,553 | 87                       |
| <i>pcaH1</i> ; protocatechuate 3,4-dioxygenase beta chain         | S23_56970                                   | 5,892,559                                    | 5,893,347 | 94                       |
| <i>pcaG2</i> ; protocatechuate 3,4-dioxygenase alpha chain        | S23_68850                                   | 7,155,946                                    | 7,156,548 | 86                       |
| <i>pcaH2</i> ; catechol 1,2-dioxygenase                           | S23_46820                                   | 4,757,823                                    | 4,758,707 | 37                       |
| <i>pcaH3</i> ; protocatechuate 3,4-dioxygenase beta chain         | S23_68860                                   | 7,156,550                                    | 7,157,251 | 93                       |
| <i>pcaB</i> ; 3-carboxy-cis,cis-muconate cycloisomerase           | S23_25870                                   | 2,716,341                                    | 2,717,696 | 87                       |
| <i>pcaC</i> ; gamma-carboxymuconolactone decarboxylase            | S23_25850                                   | 2,715,036                                    | 2,715,428 | 89                       |
| <i>pcaD</i> ; B-ketoadipate enol-lactone hydrolase                | S23_25860                                   | 2,715,530                                    | 2,716,312 | 91                       |
| <i>pcaI1</i> ; 3-oxoadipate CoA-transferase subunit A             | S23_12290                                   | 1,303,808                                    | 1,304,545 | 94                       |
| <i>pcaJ1</i> ; 3-oxoadipate CoA-transferase subunit B             | S23_12300                                   | 1,304,545                                    | 1,305,195 | 94                       |
| <i>pcaI2</i> ; 3-oxoadipate CoA-transferase subunit A             | S23_12290                                   | 1,303,808                                    | 1,304,545 | 42                       |
| <i>pcaJ2</i> ; 3-oxoadipate CoA-transferase subunit B             | S23_12300                                   | 1,304,545                                    | 1,305,195 | 52                       |
| <i>pcaF</i> ; beta-ketoadipyl CoA thiolase                        | S23_68870                                   | 7,157,386                                    | 7,158,594 | 95                       |
| <i>mxoF</i> ; methanol dehydrogenase large subunit-like protein   | S23_20820                                   | 2,195,784                                    | 2,197,592 | 89                       |
| <i>gfa</i> ; glutathione-dependent formaldehyde-activating enzyme | S23_20790                                   | 2,193,415                                    | 2,193,978 | 94                       |
| <i>flhA</i> ; alcohol dehydrogenase class III                     | S23_20800                                   | 2,194,012                                    | 2,195,121 | 96                       |
| <i>fgH</i> ; esterase D (S-formylglutathione hydrolase)           | S23_21090                                   | 2,218,425                                    | 2,219,270 | 91                       |
| <i>fdhF</i> ; formate dehydrogenase alpha subunit                 | S23_48660                                   | 4,972,045                                    | 4,974,918 | 93                       |
| <i>fdhD</i> ; formate dehydrogenase                               | S23_48670                                   | 4,974,923                                    | 4,975,753 | 84                       |

\* Amino acid sequence identity as compared with those of *B. japonicum* USDA110.

Table S12. Non-coding RNA in *Bradyrhizobium* sp. S23321

| Feature  | start   | End     | Strand | /db_xref= | /gene=      | /locus_tag= | /product=       | /note=                                                                                                   | Sequence                                                                                                                                                                                                                                                                                                                                                                                                                                                                                                 | Analysis of fRNAdb                                 |                             |                      |
|----------|---------|---------|--------|-----------|-------------|-------------|-----------------|----------------------------------------------------------------------------------------------------------|----------------------------------------------------------------------------------------------------------------------------------------------------------------------------------------------------------------------------------------------------------------------------------------------------------------------------------------------------------------------------------------------------------------------------------------------------------------------------------------------------------|----------------------------------------------------|-----------------------------|----------------------|
|          |         |         |        |           |             |             |                 |                                                                                                          |                                                                                                                                                                                                                                                                                                                                                                                                                                                                                                          | Homologous strain (accession number)               | Identity                    | fRNAdb ID (ver. 3.4) |
| ncRNA    | 1170982 | 1171142 | +      |           |             | CGA1_M002   | 6S RNA          | 6S RNA as predicted by Rfam v8.1 (RF00013), score 78.27                                                  | GCGAGGCTGCGACGCGCTCCG GAGCCATATATCCCAGGGCCCT TATCGATCCTTATAGGAACTGTC CCTGTTCCGGCCCGTGGGCCCG AGCATATGTTGCCACCTACTTT CGTAGGGAACCTCCGGATCGAG TGCTTCAACGGCGTTCCGGGCT TCGCA                                                                                                                                                                                                                                                                                                                                   | <i>Bradyrhizobium japonicum</i> USDA 110 (BA00040) | 156/161 (96%)               | FR188766             |
| misc_fea | 1741550 | 1741694 | -      |           |             | CGA1_M003   |                 | TPP riboswitch (THI element) as predicted by Rfam v8.1 (RF00059), score 65.23                            | AGCCGTTCCGAGGGGTGCTCCG AGGAGGAGCTGAGATACCCGTA AATGGCAAAGCTTGCAAATCG GCAGGCTTCCAGGACCCCGG TGACCTTTGAACTGATCCGG GTCATGCCGGCGAAGGGACAGG GATGTTGCAGACG                                                                                                                                                                                                                                                                                                                                                       |                                                    |                             |                      |
| ncRNA    | 1791001 | 1791481 | -      |           | <i>rnpB</i> | CGA1_M004   | RNase P class A |                                                                                                          | TCAGTCGGCCGGACGGCCGCTC CGGCAACGGTCGAAAGGCCGCC GGGGAGGAAAGTCCGGGCTCC TTAGCATACGGTGCCGGATAAC GTCCGGCGGGGCGACCCAGG GAAAGTGCCACAGAGAAGCAAC CGCCGCGCTGCGCCCTTCGGG GCTATGGCGGACAAAGCCGCA AGGCTCGCCGCGCCGAAGCTGC GCAAGCAGCGTAGGCGGTAAG GGTGAAAAGGTGCGGTAAGAGC GCACCCGCGCTCCGGCAACGGG GCGCGCATGGTAAACCCACCG GGAGCAAACCGAATAGGGACG GCATAGCGGGCTGTTCCGCGAA GCATAACGCGCGGGGCGATG TCAGGCCCGCCGTCGGGTAGG TTGCTCGAGGCCATGTGCAAA ATGGTCCAGAGGAATGGCCGT CACGTATCGTGCCGCAAGCGG ACGGTGCCTTACAGAACC CGGCTTACAGGCCGGCTGATATT |                                                    |                             |                      |
| misc_fea | 1847699 | 1847796 | -      |           |             | CGA1_M005   |                 | repression of heat shock gene expression (ROSE) element as predicted by Rfam v8.1 (RF00435), score 63.34 | CCCGGCCCTGACGGGTGCGGA AAGATTGAGACGGCACCGGTC GTGTCCGGTCCCGCTCGTATCC ATTTTGCTCCTTGAGGATCTGG CTATGCGCA                                                                                                                                                                                                                                                                                                                                                                                                      | <i>Bradyrhizobium japonicum</i> (AJ010144)         | 92/98 (93%)                 | FR283704             |
| misc_fea | 2622890 | 2622985 | -      |           |             | CGA1_M006   |                 | glycine riboswitch as predicted by Rfam v8.1 (RF00504), score 33.96                                      | TTGACGACATCTGAAAGAGGC ACTGGGGGTTTAAAGACCCGGA CAGCGTCCGCGACGGGATAAT ACTCTCAGGCACAGCGACAGAT GGGGCTTC                                                                                                                                                                                                                                                                                                                                                                                                       | <i>Bradyrhizobium japonicum</i> USDA 110 (BA00040) | 81/89 (91%)                 | FR303517             |
| misc_fea | 2622983 | 2623075 | -      |           |             | CGA1_M007   |                 | glycine riboswitch as predicted by Rfam v8.1 (RF00504), score 62.24                                      | TACGGCCACGTCCGGGAGAGCC GCCTTTGGTACGCCGCCCGCA ATGGCAACCCCGCGGAAACT CTCAGGCAAAAGGACCGCGTGG CTTTG                                                                                                                                                                                                                                                                                                                                                                                                           | <i>Bradyrhizobium japonicum</i> USDA 110 (BA00040) | 91/93 (97%)                 | FR235387             |
| misc_fea | 2781058 | 2781162 | -      |           |             | CGA1_M008   |                 | glycine riboswitch as predicted by Rfam v8.1 (RF00504), score 58.79                                      | CGCGACGATGCGGGAGAGATCG CAACGAAGGCTTCCAGCCTTCC TTGCGCGCCGACGGGCAACCG GCCCGGAAACTCTCAGGCAAA AGGACTGTATCGTCAGG                                                                                                                                                                                                                                                                                                                                                                                              |                                                    |                             |                      |
| misc_fea | 3487676 | 3487892 | +      |           |             | CGA1_M009   |                 | cobalamin riboswitch as predicted by Rfam v8.1 (RF00174), score 138.74                                   | CGTAGATTGCTACGTGACGGTT CTCTCACGGAGATCAAAGGG AACGTGGTCCGGGAATGTCCCA ACTTTCCGGATGCTCAATGC CATGGCTGCCCGCGCAACTGTA AGCGGTGAATCTCTCGTATAT GCGACTGGGAATCTCGGTCCCG GGAAGGCGACGACAGGTAACG ACCCGGAGCCAGGAGACCTGC CGTCAGCCGTGGTCACACG                                                                                                                                                                                                                                                                              | <i>Bradyrhizobium japonicum</i> USDA 110 (BA00040) | 200/217 (92%), Gaps = 2/217 | FR042467             |
| misc_fea | 3941182 | 3941276 | -      |           |             | CGA1_M010   |                 | subB as predicted by Rfam v8.1 (RF00519), score 26.46                                                    | CACCGCAACCCTCCTTGGCGGT TTCTCCCTAGACTTGGGCCGC TTGTGACGTGCCCTCCGACTGC AAAGAGACTACCACTTACTG ATTGTTG                                                                                                                                                                                                                                                                                                                                                                                                         |                                                    |                             |                      |
| misc_fea | 4810365 | 4810567 | -      |           |             | CGA1_M011   |                 | cobalamin riboswitch as predicted by Rfam v8.1 (RF00174), score 139.18                                   | ATCCTAGATGGCCGTGACGGTT TCCCGAGAGGGGATGAAAAGG GAATGCGGTGCGGGACGTTGT CCCCATGCGGTGGCTGCCGCC GCAACTGTAAGCGCGAATCTT GCGTCACGAGCCACTGGGTATC TCGGTCCCGGGAAGGCGACGCA AGGTGACGACCCCGGAGCCAGG AGACCTGCCGTACGCCGTGGTC ACACG                                                                                                                                                                                                                                                                                         | <i>Bradyrhizobium japonicum</i> USDA 110 (BA00040) | 187/205 (91%)               | FR398290             |
| misc_fea | 4813797 | 4814016 | -      |           |             | CGA1_M012   |                 | cobalamin riboswitch as predicted by Rfam v8.1 (RF00174), score 102.51                                   | GGCACACAGGAGATGCATGGTG CTGAGCGCGCGCAAAGCGCCG GAGCATAATCGGGAATGGGGAT GGGCGGACCCAGTTGCGGGCCG CCAAACCCAGCCGCCCGCGG ACTGTAAGCGGTAAGGGACTCC GAACCGCACTGGCCGCAAGG CTGGGAAGGCGGAGAACCCA GTGAGCCCGAGCCAGGAGACC GGCGGTGCGTGTGTTGAGGCCA                                                                                                                                                                                                                                                                            | <i>Bradyrhizobium japonicum</i> USDA 110 (BA00040) | 208/221 (94%)               | FR089286             |

|          |         |         |   |     |  |           |                                                                                                               |                                                                                                                                                                                                                                                                                                                                                                                                                                                                                                                                                |                                                |                                    |          |
|----------|---------|---------|---|-----|--|-----------|---------------------------------------------------------------------------------------------------------------|------------------------------------------------------------------------------------------------------------------------------------------------------------------------------------------------------------------------------------------------------------------------------------------------------------------------------------------------------------------------------------------------------------------------------------------------------------------------------------------------------------------------------------------------|------------------------------------------------|------------------------------------|----------|
| misc_fea | 4827149 | 4827371 | - |     |  | CGA1_M013 | cobalamin riboswitch as predicted by Rfam v8.1 (RF00174), score 93.25                                         | AAATGGTGACCCGGCGTTGGTT<br>CCTGTCTATGACAGGCGAAGA<br>GGGAATGCGATAGGGTCCGAAT<br>CTGCAAGATTCCGGTTCAAAC<br>GCAGCCGCCCGCGACCGTGA<br>CCGGAGAGATGTCCGAAGCCAC<br>TGATCCCCAGGGGATCGGGAA<br>GGCGGGGATCGAAGGGCCAAAA<br>GCCCTGCTCCGCAAGCCGGGAG<br>ACCTGCCAGCGCGGACGATTTT<br>TGG                                                                                                                                                                                                                                                                             | Bradyrhizobium japonicum<br>USDA 110 (BA00040) | 207/220 (94%)<br>Gaps = 2/220 (0%) | FR226034 |
| misc_fea | 5435974 | 5436051 | + |     |  | CGA1_M014 | suhB as predicted by Rfam v8.1 (RF00519), score 50.5                                                          | TCGATTGCTTTGCTGGGGCGT<br>TTCTCCCTAGACTTGGCCCGC<br>TTGTCAAAACAAGCGGCTCTT<br>CTTTTTGTACA                                                                                                                                                                                                                                                                                                                                                                                                                                                         | Bradyrhizobium japonicum<br>USDA 110 (BA00040) | 72/77 (94%)                        | FR328619 |
| misc_fea | 6215884 | 6215936 | - |     |  | CGA1_M015 | serC leader as predicted by Rfam v8.1 (RF00517), score 65.51                                                  | CGGCGGGACACCTCCCCCAAC<br>GGGAGGCTTACTATCTGGAAGG<br>GTAGAATAT                                                                                                                                                                                                                                                                                                                                                                                                                                                                                   |                                                |                                    |          |
| misc_fea | 6279391 | 6279550 | - |     |  | CGA1_M016 | flavin mononucleotide (FMN) riboswitch (FMN element) as predicted by Rfam v8.1 (RF00050), score 110.43        | CGATGTTCTCAGGGCGGGTGA<br>AAGTCCCCACCGCGGTAAAGG<br>CCGAAAGGCTAAGCCCGGAG<br>CGCCTTCCCAAGGTTTCTTGC<br>CAAGGGGAGGGTTCAGCAGATT<br>CGGTGCGACTCCGAAGCCGACG<br>GTTAAAGTCCGGATGAAAGAGA<br>ACGGTC                                                                                                                                                                                                                                                                                                                                                        |                                                |                                    |          |
| misc_fea | 6536167 | 6536244 | - |     |  | CGA1_M017 | suhB as predicted by Rfam v8.1 (RF00519), score 67.45                                                         | TACCGCTGCCCTCCTTGGGCGT<br>TTCTCCCTAGACTTGGCCCGC<br>TTCTTCATCAGAAGCGGCCCTT<br>TTTTATTG                                                                                                                                                                                                                                                                                                                                                                                                                                                          |                                                |                                    |          |
| misc_fea | 6569748 | 6570208 | + |     |  | CGA1_M018 | speF leader as predicted by Rfam v8.1 (RF00518), score 188.88                                                 | CTTGCCCAATTTGCGACGTGCC<br>TGTGGTCTGTGTCACTCGGTA<br>GGTATCCGGACAAGAGCCGGA<br>CAGCGCCAAGGGTGAAGAAG<br>CCGAGGGGCTCTCGGAAGTGC<br>GGAAGTCGAAAGACCCTGAAGT<br>CTGAAGACTGAAAGCAAACCCG<br>GAGCGTCCAGCATCTCTCTCAA<br>AGAGATGCCTTGTGCAAGGTGA<br>CTTCACTTTTTGCAACCGTGACT<br>GGCAGCCGGAGCGAACCAGCGC<br>CACCCCGCTCTCAACGGGGGAC<br>GCGACTTAAAGCAACGACGGAT<br>CGGGCTTTTTGGTCTCTACCG<br>GCACTCAAACGCGGGCGGGGC<br>TACTGAAAAGGCTTGTCTTCAT<br>TGCCAGGTGTGCGGGCGGAAA<br>TTCCAACCAATCCACGGCAGC<br>ACAGTCTGATTTGAGTCTTTGGC<br>TCGTGCGCTCCATCGGTGA<br>TCTGGCGGGCGCTTAT | Bradyrhizobium japonicum<br>USDA 110 (BA00040) | 425/460 (92%)                      | FR081351 |
| misc_fea | 6638444 | 6638523 | - |     |  | CGA1_M019 | S-adenosylmethionine (SAM) riboswitch (alpha-proteobacteria) as predicted by Rfam v8.1 (RF00521), score 79.68 | TGCCTGTTCCGTGGTCATTTGAG<br>CCGCGCGCTTGCAGCCAGTT<br>AAAAAAGTCTGCTAAACAGGCCG<br>GGGACGCTCCGA                                                                                                                                                                                                                                                                                                                                                                                                                                                     | Bradyrhizobium japonicum<br>USDA 110 (BA00040) | 80 /80 (100%)                      | FR000750 |
| ncRNA    | 6893107 | 6893204 | - | ffs |  | CGA1_M020 | RNA component of signal recognition particle (SRP)                                                            | GGAGATTGGCGGTGGACGAGCC<br>ACTCGCAACCGGTCAGGTCC<br>GGAAGGAAGCAGCCCTAACGAG<br>GTCCGGATCGGGTCTGCTGTC<br>GTCTCTACT                                                                                                                                                                                                                                                                                                                                                                                                                                 | Bradyrhizobium japonicum<br>USDA 110 (BA00040) | 97/97 (100%)                       | FR385819 |
| misc_fea | 6959302 | 6959381 | + |     |  | CGA1_M021 | S-adenosylmethionine (SAM) riboswitch (alpha-proteobacteria) as predicted by Rfam v8.1 (RF00521), score 84.97 | GACTTATCCCGTGGTATTTGAG<br>CCGGCCGGCTTGCAGCCAGTT<br>AAATAAGTCTGCTAAACAGGCCG<br>GGGACCTCTGTGA                                                                                                                                                                                                                                                                                                                                                                                                                                                    | Bradyrhizobium japonicum<br>USDA 110 (BA00040) | 79/80 (99%)                        | FR014451 |
